# Supplementary material for: LRRK2 Mutations and Asian Disease-Associated Variants in the First Parkinson's Disease Cohort from Kazakhstan
Source: Parkinsons Dis. 2020 Feb 19;2020:2763838. doi: 10.1155/2020/2763838 (PMC7049866; doi:10.1155/2020/2763838)
Supplement: Supplementary Materials — S1: the 8 LRRK2 SNPs and surrounding 50 base-pairs annotated in Ensembl genome browser S2: calculations of allelic and genotypic frequencies, odds ratios, and Hardy–Weinberg equilibrium S3: chromatogram for Ala419Val homozygous variant with family segregation S4: the results of KASP analysis. [file 2763838.f1.zip]

Archive with 6 entries (5 files):
- 2763838.f1/Supplement 1.xlsx
- 2763838.f1/Supplementary 2.docx
- 2763838.f1/Supplementary 3.docx
- 2763838.f1/Supplementary 4/
- 2763838.f1/Supplementary 4/Genotyping-2221.006-11 Grid.csv
- 2763838.f1/Supplementary 4/Genotyping-2221.006-11.csv
