# Supplementary material for: LRRK2 Mutations and Asian Disease-Associated Variants in the First Parkinson's Disease Cohort from Kazakhstan
Source: Parkinsons Dis. 2020 Feb 19;2020:2763838. doi: 10.1155/2020/2763838 (PMC7049866; doi:10.1155/2020/2763838)
Supplement: Supplementary Materials — S1: the 8 LRRK2 SNPs and surrounding 50 base-pairs annotated in Ensembl genome browser S2: calculations of allelic and genotypic frequencies, odds ratios, and Hardy–Weinberg equilibrium S3: chromatogram for Ala419Val homozygous variant with family segregation S4: the results of KASP analysis. [file 2763838.f1.zip › 2763838.f1/Supplement 1.xlsx]

## Sheet: Details
	For US orders LGC Genomics LLC Suite 420H 100 Cummings Center Beverly, MA 01915 USA Tel: +1 (978) 232 9430 Fax: +1 (978) 232 9435	For Europe and Rest of World LGC Genomics Ltd. Unit 1-2, Trident Industrial Estate Pindar Road Hoddesdon, Herts EN11 0WZ UK Tel +44 (0)1992 470 757 Fax +44 (0)1438 900 670
SNP Validation setup order	Please email this spreadsheet to Sales.US@lgcgroup.com	Please email this spreadsheet to orders.uk@lgcgroup.com
Organisation
Department
Contact name
Contact email address
Contact phone number
Order number			(Issued by your purchasing dept)
Quote number			(If known)
Organism
Enter SNP information	After receipt of this form, LGC will design primers and carry out a validation set up of your SNPs. LGC will contact you when the validation is complete.
Please do not change the formatting of this document as it is fed directly into the LGC Genomics laboratory information management system. Any changes made to the formatting will result in a delay to your order.

## Sheet: SNPs
Unique identifier no longer than 20 Letters long. Alpanumeric and underscore characters only.	Please use upper case letters (AGCT) for the surrounding sequence. If the surrounding sequence is less certain then use lower case (agct) letters. A combination of both Upper case and Lower case is acceptable. Replace sequence letters with letter N to mark sequence area be completly avoided. Use IUPAC ambiguity codes (R,M,S etc),or a forward slash (/) to mark the SNP to be genotyped and surround …	Chromosal location (Optional)
SNP ID	Sequence	Position
rs34594498	TTTAATTAATTCGAGTCTTAAAAAATGAACTATAATTCACTCTTGTAAGTGGAGGTGGCATGAAATATTGTTTATATGCTCTTAATTGTTGTTAGAGATATTTGATAATGGCAAGTGAGAATTTGAGATAGTTATTTAAAAGATTACTACTAACATTTTGTTTGAATTTTTGAAAGTTTCCCAGCTCATAGGGAAGTGATGCTCTCCATGCTGATGCATTCTTCATCAAAGGAAGTTTTCCAGGCATCTG[C/T]GAATGCATTGTCAACTCTCTTAGAACAAAATGGTAAGCAGTGGGCCATGTTTTCAAATAAAGGGAAACACATTTTTGTGGTATTTTTAATTATAGAAGCTATATACTGTGAAAAATTTACATAATTTATAAAGCTATATATTGT…
rs33949390	TTTTTTTTTTGAGAGTGAATGCCCCTCTGGGCTTCTAGGCCACATGGTTGCTAGAGAAATTAGGTACTGTGTTGCACTTGAAAACACTAAAATCTTTCTGACTACTTTCACTGAGCAAAGAGACATAAAATGCTTTAAATTTGCAACATTTCAGAAAATAAATTTTAGTGATTATTTATGACTCGAATCTTTCAGATTTTGACAGTGAAAGTGGAAGGTTGTCCAAAACACCCTAAGGGCATTATTTCGC[A/C]TAGAGATGTGGAAAAATTTCTTTCAAAAAAAAGGAAATTTCCAAAGAACTACATGTCACAGTATTTTAAGCTCCTAGAAAAATTCCAGATTGCTTTGCCAATAGGAGAAGAATATTTGCTGGTTCCAAGCAGGTAAAGAAAACC…
rs34778348	TAGTCTAGCTTGTTTAGTTTTCAAAATAGTGTTTTTACATTAAGAACTAATATAAGGTTGTATTACACGTAGAAATTTTAAGAAGAAAACAAATAGTGATGACTTTCTATTTTTTTTTCTCTGTAGGTTTTCTTATGCAGCTTTCAGTGATTCCAACATCATAACAGTGGTGGTAGACACTGCTCTCTATATTGCTAAGCAAAATAGCCCTGTTGTGGAAGTGTGGGATAAGAAAACTGAAAAACTCTGT[A/G]GACTAATAGACTGCGTGCACTTTTTAAGGTAAATTCTGTGGTTTTTAATTTTATTCCCAAAAGAATTATCTTTGCACTTCATGTGTCACAGAGGAAGGATTTTTCTTCCTTTCTGCCTCTGAATAGAGAATTTTTTTAAAATGC…
rs74163686	GGATTCTTGCCTGTCGTTTGAAAGATTAAAAAAATTTGTCTCTAATCTTTATTTAGGTCGTGAGGAATTCTATAGTACTCATCCCCATTTTATGACGCAGCGAGCATTGTACCTTGCTGTCTATGACCTCAGCAAGGGACAGGCTGAAGTTGATGCCATGAAGCCTTGGCTCTTC[A/C]ATATAAAGGTGATTTGTTCTGATCATTTGAAAATAGAAAATAATTCATGTGTCTGTGTGCGTGTGTGTGTGTGTGTGTAAGTTAATTTATTTTGGGCAAACAATTGCTTCAGTCTCTTTAAATACTTTCTTAAAAGAAGCACTAAAATTTTGAATTGGGAAACTTTCCGAGTAATGAAGTCATAACATGAAAATTGTATGTTCCATGTTGGTGAATG
rs35801418	TTGACCACTGAATTTTTGGTGTAGGAAAAATATGTAGTGAAACAATGTTACAAAAAGATTACAATTGTTTGGAATGATTACCTTCATTGACTTTAAGCAGTAAAATCATTTGCTCAACAAGGTTGGGTGTTTTGTGAGGCTGTATAACCATAGTGTCCTTTTGCCTTTAGTTTGTCTGACCACAGGCCTGTGATAGAGCTTCCCCATTGTGAGAACTCTGAAATTATCATCCGACTATATGAAATGCCTT[A/G]TTTTCCAATGGGATTTTGGTCAAGATTAATCAATCGATTACTTGAGATTTCACCTTACATGCTTTCAGGGAGAGGTAAGTATCTAATGAAGACTTATTAGATTTTTAGAGACTATTAATTTAGACTTATTAATTTTTAGAGAAA…
rs34637584	CAATATCTCTTAACTTTAAGGGACAAAGTGAGCACAGAATTTTTGATGCTTGACATAGTGGACATTTATATTTAAGGAAATTAGGACAAAAATTATTATAATGTAATCACATTTGAATAAGATTTCCTGTGCATTTTCTGGCAGATACCTCCACTCAGCCATGATTATATACCGAGACCTGAAACCCCACAATGTGCTGCTTTTCACACTGTATCCCAATGCTGCCATCATTGCAAAGATTGCTGACTAC[A/G]GCATTGCTCAGTACTGCTGTAGAATGGGGATAAAAACATCAGAGGGCACACCAGGTAGGTGATCAGGTCTGTCTCATAATTCTATCTTCAGGATGGATAACCACTGACCTCAGATGTGAGTTCAGAAGAGTCAAAAGGAAAACA…
rs35870237	ATCTCTTAACTTTAAGGGACAAAGTGAGCACAGAATTTTTGATGCTTGACATAGTGGACATTTATATTTAAGGAAATTAGGACAAAAATTATTATAATGTAATCACATTTGAATAAGATTTCCTGTGCATTTTCTGGCAGATACCTCCACTCAGCCATGATTATATACCGAGACCTGAAACCCCACAATGTGCTGCTTTTCACACTGTATCCCAATGCTGCCATCATTGCAAAGATTGCTGACTACGGCA[C/T]TGCTCAGTACTGCTGTAGAATGGGGATAAAAACATCAGAGGGCACACCAGGTAGGTGATCAGGTCTGTCTCATAATTCTATCTTCAGGATGGATAACCACTGACCTCAGATGTGAGTTCAGAAGAGTCAAAAGGAAAACAGAGT…
rs34995376	TATATGCCACCTAAAAGGGTGAAGAATTGGGTTAAGAAAGGCCAAAAATGACTTTTTAAAATGTCGTAAGGTTACATTTTTTTCTTAGGTTTAAGGAAAAAAGGACAGTTGTTCTTTTCTTCTTCTGAAGTCTGCTAGTTTCTCTTTTCCATTCAAGTGAATGTCACGGAAAGCAAATATCAACAGGAATGTGAGCAGGCCCAGTTTGAAAGCAAACACAAGAGGGTTTTGTGTCTTTCCCTCCAGGCTC[A/G]CGCTTCTTCTTCCCCTGTGATTCTCGTTGGCACACATTTGGATGTTTCTGATGAGAAGCAACGCAAAGCCTGCATGAGTAAAATCACCAAGGAACTCCTGAATAAGCGAGGGTTCCCTGCCATACGAGATTACCACTTTGTGAA…

## Sheet: Examples
SNP ID	Sequence
MARKER_SLASH	ATAACTACTTTTAAAGGCACATTATTCAACCTCACTGTGCATTTCATCCTC[A/T]TGCATAATGACAGTTATTCTCTCCCAAGTCTCCTTCTGGCTCAACAGAGA
MARKER_IUPAC	ATAACTACTTTTAAAGGCACATTATTCAACCTCACTGTGCATTTCATCCTC[W]TGCATAATGACAGTTATTCTCTCCCAAGTCTCCTTCTGGCTCAACAGAGA
AVOID_BASES	ATAACTACTTTTAAAGGCACAMTATTCAACCTCACTGTGCATTTNATCCNN[W]TGCATAATGACAGTTATTCTCTCCCAAGTCTCCTTCTGGCTCAACAGAGA
SUSPICIOUS_BASES	ATAACTACTTTTAAAGGCACATTATTCAACCTCActgtgcatttcatcctC[W]TGCATAATGACAGTTATTCTCTCCCAAGTCTCCTTCTGGCTCAACAGAGA
ALSO_OK_1	ATAACTACTTTTAAAGGCACATTATSCAAACCTCAYYTGCATTTCATCCTC[W]TGCATAATGACAGTTRTTCTCTCCCAAGTCTCCWWCTGGCTCAACAGAGA
ALSO_OK_2	ATAACTACTTTTAAAGGCACATTATTCAACCTCACTGTGCATTTCATCCTCA/TTGCATAATGACAGTTATTCTCTCCCAAGTCTCCTTCTGGCTCAACAGAGA
NOT_OK	ATAACTACTTTTAAAGGCACATTATSCAAACCTCAYYTGCATTTCATCCTCWTGCATAATGACAGTTRTTCTCTCCCAAGTCTCCWWCTGGCTCAACAGAGA
BAD SNP/ID	ATAACTACTTTTAAAGGCACATTATTCAACCTCACTGTGCATTTCATCCTC[A/T]TGCATAATGACAGTTATTCTCTCCCAAGTCTCCTTCTGGCTCAACAGAGA
INDEL_1	ATAACTACTTTTAAAGGCACATTATTCAACCTCACTGTGCATTTCATCCTC[A/-]TGCATAATGACAGTTATTCTCTCCCAAGTCTCCTTCTGGCTCAACAGAGA
INDEL_2	ATAACTACTTTTAAAGGCACATTATTCAACCTCACTGTGCATTTCATCCTC[A/]TGCATAATGACAGTTATTCTCTCCCAAGTCTCCTTCTGGCTCAACAGAGA
INDEL_3	ATAACTACTTTTAAAGGCACATTATTCAACCTCACTGTGCATTTCATCCTC[TATTCAACCTCACTGTGCAT/-]TGCATAATGACAGTTATTCTCTCCCAAGTCTCCTTCTGGCTCAACAGAGA
INDEL_4	ATAACTACTTTTAAAGGCACATTATTCAACCTCACTGTGCATTTCATCCTC[TATTCAACCTCACTGTGCAT/]TGCATAATGACAGTTATTCTCTCCCAAGTCTCCTTCTGGCTCAACAGAGA
INDEL_5	ATAACTACTTTTAAAGGCACATTATTCAACCTCACTGTGCATTTCATCCTC[TATTCAACCTCACTGTGCATTAAAGGCACATTATTCAACCTCACTGTGCATTTCANTATTCAACCTCACTGTGCATTAAAGGCACATTATTCAACCTCACTGTGCATTTCA/]TGCATAATGACAGTTATTCTCTCCCAAGTCTCCTTCTGGCTCAACAGAGA
SNP ID	Explanation
MARKER_SLASH	The slash character "/" is used to mark the SNP
MARKER_IUPAC	A IUPAC character "W" is used to mark the SNP
AVOID_BASES	The N characters are used to completely avoid bases.
SUSPICIOUS_BASES	The lower case characters "ctgtgcatttcatcct" are used bias the primer design algorithm to favour the uppercase bases.
ALSO_OK_1	Although other SNPs are marked, only the SNP in square brackets will be targeted.
ALSO_OK_2	Although SNP is not in brackets, it is the only one and will be targeted.
NOT_OK	Even though the W SNP in the middle is coloured red, the design algorithm does not know which SNP to design to. This sequence will be rejected.
BAD SNP/ID	The sequence is OK but the ID has spaces and a slash character. Non alphanumeric letters will be removed from the ID.
INDEL_1	Single base insertion or deletion, the inserted base is before the slash '/' and the deleted base is identified by the hyphen character '-'.
INDEL_2	Single base insertion or deletion, the inserted base is before the slash '/' and no base or symbol is identified after the slash '/'.
INDEL_3	Multiple base insertion or deletion, the inserted sequence is before the slash '/' and the deletion sequence is identified by the hyphen character '-'.
INDEL_4	Multiple base insertion or deletion, the inserted sequence is before the slash '/' and no base or symbol is identified after the slash '/'.
INDEL_5	Large insertion or deletion, within the square brackets include 50 bp at the start and end of the indel, and an N to represent the rest of the sequence. You do not need to include the full inserted or deleted sequence in cases where this is very large.
IUPAC Code	Meaning
A	A
C	C
G	G
T/U	T
M	A/C
R	A/G
W	A/T
S	C/G
Y	C/T
K	G/T
