# Supplementary material for: LRRK2 Mutations and Asian Disease-Associated Variants in the First Parkinson's Disease Cohort from Kazakhstan
Source: Parkinsons Dis. 2020 Feb 19;2020:2763838. doi: 10.1155/2020/2763838 (PMC7049866; doi:10.1155/2020/2763838)
Supplement: Supplementary Materials — S1: the 8 LRRK2 SNPs and surrounding 50 base-pairs annotated in Ensembl genome browser S2: calculations of allelic and genotypic frequencies, odds ratios, and Hardy–Weinberg equilibrium S3: chromatogram for Ala419Val homozygous variant with family segregation S4: the results of KASP analysis. [file 2763838.f1.zip › 2763838.f1/Supplementary 4/Genotyping-2221.006-11 Grid.csv]

KBiosciences grid report
Grid version 1.03
More information is available in the Genotyping-2221.006-11.csv file. This file lists only the calls for each SNP on each well with a subject ID. When a subject ID is duplicated and the calls don't match the keyword DUPE is used.
Project number	2221.006
Order number	K10040906
Plates	PD_Controls 1_KZ_102336-102435	PD_Controls 2_KZ_102438-102533	PD_Controls 3_KZ_102354-102535	Plate 1 PD_98647-98740	Plate 2 PD_102271-98764	Plate 3 PD_102271-98766
DNA \ Assay	rs35801418	rs35870237	rs34637584	rs34778348	rs33949390	rs74163686	rs34995376	rs34594498
98647	A:A	T:T	G:G	?	G:G	A:A	?	C:C
98648	?	?	G:G	?	G:G	?	?	C:C
98649	?	?	?	G:G	G:G	?	?	C:C
98650	A:A	T:T	?	G:G	G:G	A:A	?	C:C
98651	A:A	T:T	G:G	G:G	?	A:A	?	C:C
98652	A:A	T:T	G:G	G:G	G:G	A:A	?	C:C
98653	A:A	T:T	G:G	G:G	G:G	A:A	G:G	C:C
98654	A:A	T:T	G:G	G:G	?	A:A	?	C:C
98655	?	?	G:G	?	?	?	?	C:C
98656	A:A	T:T	G:G	G:G	?	A:A	?	C:C
98657	A:A	T:T	G:G	G:G	?	A:A	G:G	C:C
98658	A:A	T:T	G:G	G:G	G:G	A:A	G:G	C:C
98659	A:A	T:T	G:G	G:G	G:G	A:A	G:G	C:C
98660	A:A	T:T	G:G	?	G:G	A:A	?	C:C
98661	A:A	T:T	G:G	G:G	G:G	A:A	G:G	C:C
98662	A:A	T:T	G:G	G:G	G:G	A:A	G:G	C:C
98663	A:A	T:T	G:G	G:G	G:G	A:A	G:G	C:C
98664	A:A	T:T	G:G	G:G	G:G	A:A	G:G	C:C
98665	A:A	T:T	G:G	G:G	G:G	A:A	G:G	C:C
98666	A:A	T:T	G:G	G:G	G:G	A:A	G:G	C:C
98667	A:A	T:T	G:G	G:G	G:G	A:A	G:G	C:C
98668	A:A	T:T	G:G	G:G	G:G	A:A	G:G	C:C
98669	A:A	T:T	G:G	G:G	?	A:A	G:G	C:C
98670	A:A	T:T	G:G	G:G	G:G	A:A	G:G	C:C
98671	A:A	T:T	G:G	G:G	G:G	A:A	G:G	T:C
98672	A:A	T:T	G:G	G:G	G:G	A:A	G:G	C:C
98673	?	?	?	?	?	?	?	?
98674	A:A	T:T	G:G	G:G	G:G	A:A	G:G	C:C
98675	?	?	?	?	?	?	?	C:C
98676	?	?	?	?	?	?	?	?
98677	?	?	?	?	?	?	?	?
98678	?	?	?	?	?	?	?	?
98679	A:A	T:T	G:G	G:G	G:G	A:A	G:G	C:C
98680	A:A	T:T	G:G	G:G	G:G	A:A	G:G	C:C
98681	A:A	T:T	G:G	G:G	G:G	A:A	G:G	C:C
98682	A:A	T:T	G:G	G:G	G:G	A:A	G:G	C:C
98683	A:A	T:T	G:G	G:G	G:G	A:A	G:G	C:C
98684	A:A	T:T	G:G	G:G	G:G	A:A	G:G	C:C
98685	A:A	T:T	G:G	G:G	G:G	A:A	G:G	C:C
98686	A:A	T:T	G:G	G:G	G:G	A:A	G:G	C:C
98687	A:A	T:T	G:G	G:G	G:G	A:A	G:G	C:C
98688	A:A	T:T	G:G	G:G	G:G	A:A	G:G	C:C
98689	A:A	T:T	G:G	G:G	G:G	A:A	G:G	C:C
98690	A:A	?	G:G	G:G	G:G	A:A	G:G	C:C
98691	A:A	T:T	G:G	G:G	G:G	A:A	G:G	C:C
98692	A:A	T:T	G:G	G:G	G:G	A:A	G:G	C:C
98693	A:A	T:T	G:G	G:G	G:G	A:A	G:G	C:C
98694	A:A	T:T	G:G	G:G	G:G	A:A	G:G	C:C
98695	A:A	T:T	G:G	G:G	G:G	A:A	G:G	C:C
98696	A:A	T:T	G:G	G:G	G:G	A:A	G:G	C:C
98697	A:A	T:T	G:G	G:G	G:G	A:A	G:G	C:C
98698	A:A	T:T	G:G	G:G	G:G	A:A	G:G	C:C
98699	A:A	T:T	G:G	G:G	G:G	A:A	G:G	C:C
98700	A:A	T:T	G:G	G:G	G:G	A:A	G:G	C:C
98701	A:A	T:T	G:G	G:G	G:G	A:A	G:G	C:C
98702	A:A	T:T	G:G	G:G	G:G	A:A	?	C:C
98703	A:A	T:T	G:G	G:G	G:G	A:A	G:G	C:C
98704	A:A	T:T	G:G	G:G	G:G	A:A	G:G	C:C
98705	A:A	T:T	G:G	G:G	G:G	A:A	G:G	C:C
98706	A:A	T:T	G:G	G:G	G:G	A:A	G:G	C:C
98707	A:A	T:T	G:G	G:G	G:G	A:A	G:G	C:C
98708	A:A	T:T	G:G	G:G	G:G	A:A	G:G	C:C
98709	A:A	T:T	G:G	G:G	G:G	A:A	G:G	C:C
98710	A:A	T:T	G:G	G:G	G:G	A:A	G:G	C:C
98711	A:A	T:T	G:G	G:G	G:G	A:A	G:G	C:C
98712	A:A	T:T	G:G	G:G	G:G	A:A	G:G	C:C
98713	A:A	T:T	G:G	G:G	G:G	A:A	G:G	T:C
98714	A:A	T:T	G:G	G:G	G:G	A:A	G:G	C:C
98715	A:A	T:T	G:G	G:G	G:G	A:A	G:G	C:C
98716	A:A	T:T	G:G	G:G	G:G	A:A	G:G	C:C
98717	A:A	T:T	G:G	G:G	G:G	A:A	?	C:C
98718	A:A	T:T	G:G	G:G	G:G	A:A	G:G	C:C
98719	A:A	T:T	G:G	G:G	G:G	A:A	G:G	C:C
98720	A:A	T:T	G:G	G:G	G:G	A:A	G:G	C:C
98721	A:A	T:T	G:G	G:G	G:G	A:A	G:G	C:C
98722	A:A	T:T	G:G	G:G	G:G	A:A	G:G	T:C
98723	A:A	T:T	G:G	G:G	G:G	A:A	G:G	C:C
98724	A:A	T:T	G:G	G:G	G:G	A:A	G:G	C:C
98725	A:A	T:T	G:G	G:G	G:G	A:A	G:G	C:C
98726	A:A	T:T	G:G	G:G	G:G	A:A	G:G	C:C
98727	A:A	T:T	G:G	G:G	G:G	A:A	G:G	C:C
98728	A:A	T:T	G:G	G:G	G:G	A:A	G:G	C:C
98729	A:A	T:T	G:G	G:G	G:G	A:A	G:G	C:C
98730	A:A	T:T	G:G	G:G	G:G	A:A	G:G	C:C
98731	A:A	T:T	G:G	G:G	G:G	A:A	G:G	C:C
98732	A:A	T:T	G:G	G:G	G:G	A:A	G:G	C:C
98733	A:A	T:T	G:G	G:G	G:G	A:A	G:G	C:C
98734	A:A	T:T	G:G	G:G	G:G	A:A	G:G	C:C
98735	A:A	T:T	G:G	G:G	G:G	A:A	G:G	C:C
98736	A:A	T:T	G:G	G:G	G:G	A:A	G:G	C:C
98737	A:A	T:T	G:G	G:G	G:G	A:A	G:G	C:C
98738	A:A	T:T	G:G	G:G	G:G	A:A	G:G	C:C
98739	A:A	T:T	G:G	G:G	G:G	A:A	G:G	C:C
98740	A:A	T:T	G:G	G:G	G:G	A:A	G:G	C:C
98760	A:A	T:T	G:G	G:G	G:G	A:A	G:G	C:C
98761	A:A	T:T	G:G	G:G	G:G	A:A	G:G	C:C
98762	A:A	T:T	G:G	G:G	G:G	A:A	G:G	C:C
98763	A:A	T:T	G:G	G:G	G:G	A:A	G:G	C:C
98764	A:A	T:T	G:G	G:G	G:G	A:A	G:G	C:C
98765	A:A	T:T	G:G	G:G	G:G	A:A	G:G	C:C
98766	A:A	T:T	G:G	G:G	G:G	A:A	G:G	C:C
102171	A:A	T:T	G:G	G:G	G:G	A:A	G:G	C:C
102172	A:A	T:T	G:G	G:G	G:G	A:A	G:G	C:C
102173	A:A	T:T	G:G	G:G	G:G	A:A	G:G	C:C
102174	A:A	T:T	G:G	G:G	G:G	A:A	G:G	T:C
102175	A:A	T:T	G:G	G:G	G:G	A:A	G:G	C:C
102176	A:A	T:T	G:G	G:G	G:G	A:A	G:G	C:C
102177	A:A	T:T	G:G	G:G	G:G	A:A	G:G	C:C
102178	A:A	T:T	G:G	G:G	G:G	A:A	G:G	C:C
102179	A:A	T:T	G:G	G:G	G:G	A:A	G:G	C:C
102180	A:A	T:T	G:G	G:G	G:G	A:A	G:G	C:C
102181	A:A	T:T	G:G	G:G	G:G	A:A	G:G	C:C
102182	A:A	T:T	G:G	G:G	G:G	A:A	G:G	C:C
102183	A:A	T:T	G:G	G:G	G:G	A:A	G:G	C:C
102184	A:A	T:T	G:G	G:G	G:G	A:A	G:G	C:C
102185	A:A	T:T	G:G	G:G	G:G	A:A	G:G	C:C
102186	A:A	T:T	G:G	G:G	G:G	A:A	G:G	C:C
102187	A:A	?	G:G	G:G	G:G	A:A	G:G	C:C
102188	A:A	T:T	G:G	G:G	G:G	A:A	G:G	C:C
102189	A:A	T:T	G:G	G:G	G:G	A:A	G:G	C:C
102190	A:A	T:T	G:G	G:G	G:G	A:A	G:G	C:C
102191	A:A	T:T	G:G	G:G	G:G	A:A	G:G	C:C
102192	A:A	T:T	G:G	G:G	G:G	A:A	G:G	C:C
102193	A:A	T:T	G:G	G:G	G:G	A:A	G:G	C:C
102194	A:A	T:T	G:G	G:G	G:G	A:A	G:G	C:C
102195	A:A	T:T	G:G	G:G	G:G	A:A	G:G	C:C
102196	A:A	T:T	G:G	G:G	G:G	A:A	G:G	C:C
102197	A:A	T:T	G:G	G:G	G:G	A:A	G:G	C:C
102198	A:A	T:T	G:G	A:G	G:G	A:A	G:G	C:C
102199	A:A	T:T	G:G	G:G	G:G	A:A	G:G	C:C
102200	A:A	T:T	G:G	G:G	G:G	A:A	G:G	C:C
102201	A:A	T:T	G:G	G:G	G:G	A:A	G:G	C:C
102202	A:A	T:T	G:G	G:G	G:G	A:A	G:G	C:C
102203	A:A	T:T	G:G	G:G	G:G	A:A	G:G	C:C
102204	A:A	T:T	G:G	G:G	G:G	A:A	G:G	C:C
102205	A:A	T:T	G:G	G:G	G:G	A:A	G:G	C:C
102206	A:A	T:T	G:G	G:G	G:G	A:A	G:G	C:C
102207	A:A	T:T	G:G	G:G	G:G	A:A	G:G	C:C
102208	A:A	T:T	G:G	G:G	G:G	A:A	G:G	C:C
102209	A:A	T:T	G:G	G:G	G:G	A:A	G:G	C:C
102210	A:A	T:T	G:G	G:G	G:G	A:A	G:G	C:C
102211	A:A	T:T	G:G	G:G	G:G	A:A	G:G	C:C
102212	A:A	T:T	G:G	G:G	G:G	A:A	G:G	C:C
102213	A:A	T:T	G:G	G:G	G:G	A:A	G:G	C:C
102214	A:A	T:T	G:G	G:G	G:G	A:A	G:G	C:C
102215	A:A	T:T	G:G	G:G	G:G	A:A	G:G	C:C
102216	A:A	T:T	G:G	G:G	G:G	A:A	G:G	C:C
102217	A:A	T:T	G:G	G:G	G:G	A:A	G:G	C:C
102218	A:A	T:T	G:G	G:G	G:G	A:A	G:G	C:C
102219	A:A	T:T	G:G	G:G	G:G	A:A	G:G	C:C
102221	A:A	T:T	G:G	G:G	G:G	A:A	G:G	C:C
102222	A:A	T:T	G:G	G:G	G:G	A:A	G:G	C:C
102223	A:A	T:T	G:G	G:G	G:G	A:A	G:G	C:C
102224	A:A	T:T	G:G	G:G	G:G	A:A	G:G	C:C
102225	A:A	T:T	G:G	G:G	G:G	A:A	G:G	C:C
102226	A:A	T:T	G:G	G:G	G:G	A:A	G:G	C:C
102227	A:A	T:T	G:G	G:G	G:G	A:A	G:G	C:C
102228	A:A	T:T	G:G	G:G	G:G	A:A	G:G	C:C
102229	A:A	T:T	G:G	G:G	G:G	A:A	G:G	C:C
102230	A:A	T:T	G:G	G:G	G:G	A:A	G:G	C:C
102231	A:A	T:T	G:G	G:G	G:G	A:A	G:G	C:C
102232	A:A	T:T	G:G	G:G	G:G	A:A	G:G	C:C
102233	A:A	T:T	G:G	G:G	G:G	A:A	G:G	C:C
102234	A:A	T:T	G:G	G:G	G:G	A:A	G:G	C:C
102235	?	T:T	G:G	G:G	G:G	A:A	G:G	C:C
102236	A:A	T:T	G:G	G:G	G:G	A:A	G:G	C:C
102237	A:A	T:T	G:G	G:G	G:G	A:A	G:G	C:C
102238	A:A	T:T	G:G	G:G	G:G	A:A	G:G	C:C
102239	A:A	T:T	G:G	G:G	G:G	A:A	G:G	C:C
102240	A:A	T:T	G:G	G:G	G:G	A:A	G:G	C:C
102241	A:A	T:T	G:G	G:G	G:G	A:A	G:G	C:C
102242	A:A	T:T	G:G	G:G	G:G	A:A	G:G	C:C
102243	A:A	T:T	G:G	G:G	G:G	A:A	G:G	C:C
102244	?	T:T	G:G	G:G	G:G	A:A	G:G	C:C
102245	A:A	T:T	G:G	G:G	G:G	A:A	G:G	C:C
102246	A:A	T:T	G:G	G:G	G:G	A:A	G:G	T:C
102247	A:A	T:T	G:G	G:G	G:G	A:A	G:G	C:C
102248	A:A	T:T	G:G	G:G	G:G	A:A	G:G	C:C
102249	A:A	T:T	G:G	G:G	G:G	A:A	G:G	C:C
102250	?	T:T	G:G	G:G	G:G	A:A	G:G	C:C
102251	A:A	T:T	G:G	G:G	G:G	A:A	G:G	C:C
102252	A:A	T:T	G:G	G:G	G:G	A:A	G:G	C:C
102253	A:A	T:T	G:G	G:G	G:G	A:A	G:G	C:C
102254	A:A	T:T	G:G	G:G	G:G	A:A	G:G	C:C
102256	A:A	T:T	G:G	G:G	G:G	A:A	G:G	C:C
102258	A:A	T:T	G:G	G:G	G:G	A:A	G:G	T:T
102259	A:A	T:T	G:G	G:G	G:G	A:A	G:G	C:C
102260	A:A	T:T	G:G	G:G	G:G	A:A	G:G	C:C
102263	A:A	T:T	G:G	G:G	G:G	A:A	G:G	C:C
102265	A:A	T:T	G:G	G:G	G:G	A:A	G:G	C:C
102267	A:A	T:T	G:G	G:G	G:G	A:A	G:G	C:C
102269	A:A	T:T	?	G:G	G:G	A:A	G:G	C:C
102270	A:A	T:T	G:G	A:G	G:G	A:A	G:G	C:C
102271	A:A	T:T	G:G	G:G	G:G	A:A	G:G	C:C
102272	A:A	T:T	G:G	G:G	G:G	A:A	G:G	C:C
102273	A:A	T:T	G:G	G:G	G:G	A:A	G:G	C:C
102275	A:A	T:T	G:G	G:G	G:G	A:A	G:G	C:C
102276	A:A	T:T	G:G	G:G	G:G	A:A	G:G	C:C
102277	A:A	T:T	G:G	G:G	G:G	A:A	G:G	C:C
102280	A:A	T:T	G:G	G:G	G:G	A:A	G:G	C:C
102281	A:A	T:T	G:G	G:G	G:G	A:A	G:G	C:C
102282	A:A	T:T	G:G	G:G	G:G	A:A	G:G	C:C
102284	A:A	?	G:G	G:G	G:G	A:A	G:G	C:C
102285	A:A	T:T	G:G	G:G	G:G	A:A	G:G	C:C
102286	A:A	T:T	G:G	G:G	G:G	A:A	G:G	C:C
102287	A:A	T:T	G:G	G:G	G:G	A:A	G:G	C:C
102288	A:A	T:T	G:G	G:G	G:G	A:A	G:G	C:C
102289	A:A	T:T	G:G	G:G	G:G	A:A	G:G	C:C
102291	A:A	T:T	G:G	G:G	G:G	A:A	G:G	C:C
102292	A:A	T:T	G:G	?	G:G	A:A	G:G	C:C
102293	A:A	T:T	G:G	G:G	G:G	A:A	G:G	C:C
102294	A:A	T:T	G:G	G:G	G:G	A:A	G:G	C:C
102295	A:A	T:T	G:G	G:G	G:G	A:A	G:G	T:C
102296	A:A	T:T	G:G	?	G:G	A:A	G:G	C:C
102297	?	?	?	?	?	?	?	?
102298	A:A	T:T	G:G	G:G	G:G	A:A	G:G	C:C
102300	A:A	T:T	G:G	G:G	G:G	A:A	G:G	C:C
102301	A:A	T:T	G:G	G:G	G:G	A:A	G:G	C:C
102302	A:A	T:T	G:G	G:G	G:G	A:A	G:G	C:C
102304	A:A	T:T	G:G	G:G	G:G	A:A	G:G	C:C
102306	A:A	T:T	G:G	G:G	G:G	A:A	G:G	C:C
102308	A:A	T:T	G:G	G:G	G:G	A:A	G:G	C:C
102310	A:A	T:T	G:G	G:G	G:G	A:A	G:G	C:C
102311	A:A	T:T	G:G	G:G	G:G	A:A	G:G	C:C
102312	A:A	T:T	G:G	G:G	G:G	A:A	G:G	C:C
102313	A:A	T:T	G:G	G:G	G:G	A:A	G:G	C:C
102315	A:A	T:T	G:G	G:G	G:G	A:A	G:G	C:C
102316	A:A	T:T	G:G	G:G	G:G	A:A	G:G	C:C
102317	A:A	T:T	G:G	G:G	G:G	A:A	G:G	C:C
102318	A:A	T:T	G:G	G:G	G:G	A:A	G:G	C:C
102319	A:A	T:T	G:G	G:G	G:G	A:A	G:G	T:C
102320	A:A	T:T	G:G	G:G	G:G	A:A	G:G	T:C
102321	A:A	T:T	G:G	G:G	G:G	A:A	G:G	C:C
102322	A:A	T:T	G:G	G:G	G:G	A:A	G:G	C:C
102324	?	?	?	?	?	?	?	?
102325	A:A	T:T	G:G	G:G	G:G	A:A	G:G	C:C
102326	A:A	T:T	G:G	G:G	G:G	A:A	G:G	C:C
102327	A:A	T:T	G:G	G:G	G:G	A:A	G:G	C:C
102328	A:A	T:T	G:G	G:G	G:G	A:A	G:G	C:C
102329	A:A	T:T	G:G	G:G	G:G	A:A	G:G	C:C
102330	A:A	T:T	G:G	G:G	G:G	A:A	G:G	C:C
102331	A:A	T:T	G:G	G:G	G:G	A:A	G:G	C:C
102332	A:A	T:T	G:G	G:G	G:G	A:A	G:G	C:C
102333	A:A	T:T	G:G	G:G	G:G	A:A	G:G	C:C
102334	A:A	T:T	G:G	G:G	G:G	A:A	G:G	C:C
102335	A:A	T:T	G:G	G:G	G:G	A:A	G:G	C:C
102336	A:A	T:T	G:G	G:G	G:G	A:A	G:G	C:C
102337	A:A	T:T	G:G	G:G	G:G	A:A	G:G	C:C
102338	A:A	T:T	G:G	G:G	G:G	A:A	G:G	C:C
102339	A:A	T:T	G:G	G:G	G:G	A:A	G:G	C:C
102340	A:A	T:T	G:G	G:G	G:G	A:A	G:G	C:C
102341	A:A	T:T	G:G	G:G	G:G	A:A	G:G	C:C
102342	A:A	T:T	G:G	G:G	G:G	A:A	G:G	C:C
102343	A:A	T:T	G:G	G:G	G:G	A:A	G:G	C:C
102344	A:A	T:T	G:G	G:G	G:G	A:A	G:G	C:C
102345	A:A	?	G:G	G:G	G:G	A:A	G:G	C:C
102346	A:A	T:T	G:G	G:G	G:G	A:A	G:G	C:C
102347	A:A	T:T	G:G	G:G	G:G	A:A	G:G	C:C
102348	A:A	T:T	G:G	G:G	G:G	A:A	G:G	C:C
102349	A:A	T:T	G:G	A:G	G:G	A:A	G:G	C:C
102350	A:A	T:T	G:G	G:G	G:G	A:A	G:G	C:C
102351	A:A	T:T	G:G	G:G	G:G	A:A	G:G	C:C
102352	A:A	T:T	G:G	G:G	G:G	A:A	G:G	C:C
102353	A:A	T:T	G:G	G:G	G:G	A:A	G:G	C:C
102354	A:A	T:T	G:G	G:G	G:G	A:A	G:G	C:C
102355	A:A	T:T	G:G	G:G	G:G	A:A	G:G	C:C
102356	A:A	T:T	G:G	G:G	G:G	A:A	G:G	C:C
102357	A:A	T:T	G:G	G:G	G:G	A:A	G:G	C:C
102358	A:A	T:T	G:G	G:G	G:G	A:A	G:G	C:C
102359	A:A	T:T	G:G	G:G	G:G	A:A	G:G	C:C
102360	A:A	T:T	G:G	G:G	G:G	A:A	G:G	C:C
102361	A:A	T:T	G:G	G:G	G:G	A:A	G:G	C:C
102362	A:A	T:T	G:G	G:G	G:G	A:A	G:G	C:C
102363	A:A	T:T	G:G	G:G	G:G	A:A	G:G	C:C
102364	A:A	T:T	G:G	G:G	G:G	A:A	G:G	C:C
102365	A:A	T:T	G:G	G:G	G:G	A:A	G:G	C:C
102366	A:A	T:T	G:G	G:G	G:G	A:A	G:G	C:C
102367	A:A	T:T	G:G	G:G	G:G	A:A	G:G	C:C
102368	A:A	T:T	G:G	G:G	G:G	A:A	G:G	C:C
102369	A:A	T:T	G:G	G:G	G:G	A:A	G:G	C:C
102370	A:A	T:T	G:G	G:G	G:G	A:A	G:G	C:C
102371	A:A	T:T	G:G	G:G	G:G	A:A	G:G	C:C
102372	A:A	T:T	G:G	G:G	G:G	A:A	G:G	C:C
102373	A:A	T:T	G:G	G:G	G:G	A:A	G:G	C:C
102374	A:A	T:T	G:G	G:G	G:G	A:A	G:G	C:C
102375	A:A	T:T	G:G	G:G	G:G	A:A	G:G	C:C
102376	A:A	T:T	G:G	G:G	G:G	A:A	G:G	C:C
102377	A:A	T:T	G:G	G:G	G:G	A:A	G:G	C:C
102378	A:A	T:T	G:G	G:G	G:G	A:A	G:G	C:C
102379	A:A	T:T	G:G	G:G	G:G	A:A	G:G	C:C
102380	A:A	T:T	G:G	G:G	G:G	A:A	G:G	C:C
102381	A:A	T:T	G:G	G:G	G:G	A:A	G:G	C:C
102382	A:A	T:T	G:G	G:G	G:G	A:A	G:G	C:C
102383	A:A	T:T	G:G	G:G	G:G	A:A	G:G	C:C
102384	A:A	T:T	G:G	G:G	G:G	A:A	G:G	C:C
102385	A:A	T:T	G:G	G:G	G:G	A:A	G:G	C:C
102386	A:A	T:T	G:G	G:G	G:G	A:A	G:G	C:C
102387	A:A	T:T	G:G	G:G	G:G	A:A	G:G	C:C
102388	A:A	T:T	G:G	G:G	G:G	A:A	G:G	C:C
102389	A:A	T:T	G:G	G:G	G:G	A:A	G:G	C:C
102390	A:A	T:T	G:G	G:G	G:G	A:A	G:G	C:C
102391	A:A	T:T	G:G	G:G	G:G	A:A	G:G	C:C
102392	A:A	T:T	G:G	G:G	G:G	A:A	G:G	C:C
102393	A:A	T:T	G:G	G:G	G:G	A:A	G:G	C:C
102394	A:A	T:T	G:G	G:G	G:G	A:A	G:G	C:C
102395	A:A	T:T	G:G	G:G	G:G	A:A	G:G	C:C
102396	A:A	T:T	G:G	G:G	G:G	A:A	G:G	T:C
102397	A:A	T:T	G:G	G:G	G:G	A:A	G:G	C:C
102398	A:A	T:T	G:G	G:G	G:G	A:A	G:G	C:C
102399	A:A	T:T	G:G	G:G	G:G	A:A	G:G	C:C
102400	A:A	T:T	G:G	G:G	G:G	A:A	G:G	C:C
102401	A:A	T:T	G:G	G:G	G:G	A:A	G:G	C:C
102402	A:A	T:T	G:G	G:G	G:G	A:A	G:G	C:C
102403	A:A	T:T	G:G	G:G	G:G	A:A	G:G	C:C
102404	A:A	T:T	G:G	G:G	G:G	A:A	G:G	C:C
102405	A:A	T:T	G:G	G:G	G:G	A:A	G:G	C:C
102406	A:A	T:T	G:G	G:G	G:G	A:A	G:G	C:C
102407	?	?	?	?	C:G	?	G:G	?
102408	A:A	T:T	G:G	G:G	G:G	A:A	G:G	C:C
102409	?	T:T	G:G	G:G	G:G	A:A	G:G	C:C
102410	A:A	T:T	G:G	G:G	G:G	A:A	G:G	C:C
102411	A:A	T:T	G:G	G:G	G:G	A:A	G:G	C:C
102412	?	T:T	G:G	G:G	?	A:A	G:G	T:C
102413	A:A	T:T	G:G	G:G	G:G	A:A	G:G	C:C
102414	A:A	T:T	G:G	G:G	G:G	A:A	G:G	C:C
102415	A:A	T:T	G:G	G:G	G:G	A:A	G:G	C:C
102416	A:A	?	G:G	G:G	G:G	A:A	G:G	C:C
102417	A:A	T:T	G:G	G:G	G:G	A:A	G:G	T:C
102418	A:A	T:T	G:G	A:G	G:G	A:A	G:G	C:C
102419	A:A	T:T	G:G	G:G	G:G	A:A	G:G	C:C
102420	A:A	T:T	G:G	G:G	G:G	A:A	G:G	C:C
102421	A:A	T:T	G:G	G:G	G:G	A:A	G:G	C:C
102422	A:A	T:T	G:G	G:G	G:G	A:A	G:G	C:C
102423	A:A	T:T	G:G	G:G	G:G	A:A	G:G	C:C
102424	A:A	T:T	G:G	?	G:G	A:A	G:G	C:C
102425	A:A	T:T	G:G	G:G	G:G	A:A	G:G	C:C
102426	A:A	T:T	G:G	G:G	G:G	A:A	G:G	C:C
102427	A:A	T:T	G:G	G:G	G:G	A:A	G:G	C:C
102428	A:A	T:T	G:G	G:G	G:G	A:A	G:G	C:C
102429	A:A	T:T	G:G	G:G	G:G	A:A	G:G	C:C
102430	A:A	T:T	G:G	G:G	G:G	A:A	G:G	C:C
102431	A:A	T:T	G:G	G:G	G:G	A:A	G:G	C:C
102432	A:A	T:T	G:G	G:G	G:G	A:A	G:G	C:C
102433	A:A	T:T	G:G	G:G	G:G	A:A	G:G	C:C
102434	A:A	T:T	G:G	G:G	G:G	A:A	G:G	C:C
102435	A:A	T:T	G:G	G:G	G:G	A:A	G:G	C:C
102436	A:A	T:T	G:G	G:G	G:G	A:A	G:G	C:C
102437	?	T:T	G:G	G:G	G:G	A:A	G:G	C:C
102438	A:A	T:T	G:G	G:G	G:G	A:A	G:G	C:C
102439	A:A	T:T	G:G	G:G	G:G	A:A	G:G	C:C
102440	A:A	T:T	G:G	G:G	G:G	A:A	G:G	C:C
102441	A:A	T:T	G:G	G:G	G:G	A:A	G:G	C:C
102442	A:A	T:T	G:G	G:G	G:G	A:A	G:G	C:C
102443	?	?	?	?	?	?	?	?
102444	A:A	T:T	G:G	G:G	G:G	A:A	G:G	C:C
102445	A:A	T:T	G:G	G:G	G:G	A:A	G:G	C:C
102446	A:A	T:T	G:G	G:G	G:G	A:A	G:G	C:C
102447	A:A	T:T	G:G	G:G	G:G	A:A	G:G	C:C
102448	A:A	T:T	G:G	G:G	G:G	A:A	G:G	C:C
102449	A:A	T:T	G:G	G:G	G:G	A:A	G:G	C:C
102450	A:A	T:T	G:G	G:G	G:G	A:A	G:G	C:C
102451	A:A	T:T	G:G	G:G	G:G	A:A	G:G	C:C
102452	A:A	T:T	G:G	G:G	G:G	A:A	G:G	C:C
102453	A:A	T:T	G:G	G:G	G:G	A:A	G:G	C:C
102454	A:A	T:T	G:G	G:G	G:G	A:A	G:G	C:C
102455	A:A	T:T	G:G	G:G	G:G	A:A	G:G	C:C
102456	A:A	T:T	G:G	G:G	G:G	A:A	G:G	C:C
102457	A:A	T:T	G:G	G:G	G:G	A:A	G:G	C:C
102458	A:A	T:T	G:G	G:G	G:G	A:A	G:G	C:C
102459	A:A	T:T	G:G	G:G	G:G	A:A	G:G	C:C
102460	A:A	T:T	G:G	G:G	G:G	A:A	G:G	C:C
102461	A:A	?	G:G	G:G	G:G	A:A	G:G	C:C
102462	A:A	T:T	G:G	G:G	G:G	A:A	G:G	C:C
102463	A:A	T:T	G:G	G:G	G:G	A:A	G:G	C:C
102464	A:A	T:T	G:G	G:G	G:G	A:A	G:G	C:C
102465	A:A	T:T	G:G	G:G	G:G	A:A	G:G	C:C
102466	A:A	T:T	G:G	G:G	G:G	A:A	G:G	C:C
102467	A:A	T:T	G:G	G:G	G:G	A:A	G:G	C:C
102468	A:A	T:T	G:G	G:G	G:G	A:A	G:G	C:C
102469	A:A	T:T	G:G	G:G	G:G	A:A	G:G	C:C
102470	A:A	T:T	G:G	G:G	G:G	A:A	G:G	C:C
102471	A:A	T:T	G:G	G:G	G:G	A:A	G:G	C:C
102472	A:A	T:T	G:G	G:G	G:G	A:A	G:G	C:C
102473	A:A	T:T	G:G	G:G	G:G	A:A	G:G	C:C
102474	A:A	T:T	G:G	G:G	G:G	A:A	G:G	C:C
102475	A:A	T:T	G:G	G:G	G:G	A:A	G:G	C:C
102476	A:A	T:T	G:G	G:G	G:G	A:A	G:G	T:C
102477	A:A	T:T	G:G	G:G	G:G	A:A	G:G	C:C
102478	A:A	T:T	G:G	G:G	G:G	A:A	G:G	C:C
102479	A:A	T:T	?	G:G	G:G	A:A	G:G	C:C
102480	A:A	T:T	G:G	G:G	G:G	A:A	G:G	C:C
102481	A:A	T:T	G:G	G:G	G:G	A:A	G:G	C:C
102482	A:A	T:T	G:G	G:G	G:G	A:A	G:G	C:C
102483	A:A	T:T	G:G	G:G	G:G	A:A	G:G	C:C
102484	A:A	T:T	G:G	G:G	G:G	A:A	G:G	C:C
102485	A:A	T:T	G:G	G:G	G:G	A:A	G:G	C:C
102486	A:A	T:T	G:G	G:G	G:G	A:A	G:G	C:C
102487	A:A	T:T	G:G	G:G	G:G	A:A	G:G	C:C
102488	A:A	T:T	G:G	G:G	G:G	A:A	G:G	C:C
102489	A:A	T:T	G:G	G:G	G:G	A:A	G:G	C:C
102490	A:A	T:T	G:G	G:G	G:G	A:A	G:G	C:C
102491	A:A	T:T	G:G	G:G	G:G	A:A	G:G	C:C
102492	A:A	T:T	G:G	G:G	G:G	A:A	G:G	C:C
102493	A:A	T:T	G:G	G:G	G:G	A:A	G:G	C:C
102494	A:A	T:T	G:G	G:G	G:G	A:A	G:G	C:C
102495	A:A	T:T	G:G	G:G	G:G	A:A	G:G	C:C
102496	A:A	T:T	G:G	G:G	G:G	A:A	G:G	C:C
102497	A:A	T:T	G:G	G:G	G:G	A:A	G:G	C:C
102498	A:A	T:T	G:G	G:G	G:G	A:A	G:G	C:C
102499	A:A	T:T	G:G	G:G	G:G	A:A	G:G	C:C
102500	A:A	T:T	G:G	G:G	G:G	A:A	G:G	C:C
102501	A:A	T:T	G:G	G:G	G:G	A:A	G:G	C:C
102502	A:A	T:T	G:G	G:G	G:G	A:A	G:G	C:C
102503	A:A	T:T	G:G	G:G	G:G	A:A	G:G	C:C
102504	A:A	T:T	G:G	G:G	G:G	A:A	G:G	C:C
102505	A:A	T:T	G:G	G:G	G:G	A:A	G:G	C:C
102506	A:A	T:T	G:G	G:G	G:G	A:A	G:G	C:C
102507	A:A	T:T	G:G	G:G	G:G	A:A	G:G	C:C
102508	A:A	T:T	G:G	?	G:G	A:A	G:G	C:C
102509	A:A	T:T	G:G	G:G	G:G	A:A	G:G	C:C
102510	A:A	T:T	G:G	G:G	G:G	A:A	G:G	C:C
102511	A:A	T:T	G:G	G:G	G:G	A:A	G:G	C:C
102512	A:A	T:T	G:G	G:G	G:G	A:A	G:G	C:C
102513	A:A	T:T	G:G	G:G	G:G	A:A	G:G	C:C
102514	A:A	T:T	G:G	G:G	G:G	A:A	G:G	C:C
102515	A:A	T:T	G:G	G:G	G:G	A:A	G:G	C:C
102516	A:A	T:T	G:G	G:G	G:G	A:A	G:G	C:C
102517	A:A	T:T	G:G	G:G	G:G	A:A	G:G	C:C
102518	A:A	T:T	G:G	G:G	G:G	A:A	G:G	C:C
102519	A:A	T:T	G:G	G:G	G:G	A:A	G:G	C:C
102520	A:A	T:T	G:G	G:G	G:G	A:A	G:G	C:C
102521	A:A	T:T	G:G	G:G	G:G	A:A	G:G	C:C
102522	A:A	T:T	G:G	G:G	G:G	A:A	G:G	C:C
102523	A:A	T:T	G:G	G:G	G:G	A:A	G:G	C:C
102524	A:A	T:T	G:G	G:G	G:G	A:A	G:G	C:C
102525	A:A	T:T	G:G	G:G	G:G	A:A	G:G	C:C
102526	A:A	T:T	G:G	G:G	G:G	A:A	G:G	C:C
102527	A:A	T:T	G:G	G:G	G:G	A:A	G:G	C:C
102528	A:A	T:T	G:G	G:G	G:G	A:A	G:G	C:C
102529	A:A	T:T	G:G	G:G	G:G	A:A	G:G	C:C
102530	A:A	T:T	?	G:G	G:G	A:A	G:G	C:C
102531	A:A	T:T	G:G	G:G	G:G	A:A	G:G	C:C
102532	A:A	T:T	G:G	G:G	G:G	A:A	G:G	C:C
102533	A:A	T:T	G:G	G:G	G:G	A:A	G:G	C:C
102534	A:A	T:T	G:G	G:G	G:G	A:A	G:G	C:C
102535	A:A	T:T	G:G	G:G	G:G	A:A	G:G	C:C
