# Supplementary material for: LRRK2 Mutations and Asian Disease-Associated Variants in the First Parkinson's Disease Cohort from Kazakhstan
Source: Parkinsons Dis. 2020 Feb 19;2020:2763838. doi: 10.1155/2020/2763838 (PMC7049866; doi:10.1155/2020/2763838)
Supplement: Supplementary Materials — S1: the 8 LRRK2 SNPs and surrounding 50 base-pairs annotated in Ensembl genome browser S2: calculations of allelic and genotypic frequencies, odds ratios, and Hardy–Weinberg equilibrium S3: chromatogram for Ala419Val homozygous variant with family segregation S4: the results of KASP analysis. [file 2763838.f1.zip › 2763838.f1/Supplementary 4/Genotyping-2221.006-11.csv]

KBiosciences genotyping report
LGC-Genomics
Export version	1.21
Customer	UCL - lnstitute of Liver and Digestive Health
Customer number	2221
Project number	2221.006
Master plate type	96
Order number	K10040906
View mode	auto / original data
Viewing	Please download SNPViewer to graphically view this file or to find out more about the syntax from http://results.lgcgenomics.com/software/snpviewer/
Editing	This file maybe graphically edited and re-called using LGC KlusterCaller software from http://results.lgcgenomics.com/software/klustercaller/
Title
Statistics
SNP	Plate	Y	Het	X	NTC	Unused	Missing	Bad	Allele Y%	Allele X%	X2	Allele Y	Allele X
rs35801418		0	0	0	0	0	0	0	0.00	0.00	0.00	G	A
rs35801418	PD_Controls 1_KZ_102336-102435	0	0	92	2	2	0	0	0.00	100.00	0.00	G	A
rs35801418	PD_Controls 2_KZ_102438-102533	0	0	93	2	1	0	0	0.00	100.00	0.00	G	A
rs35801418	PD_Controls 3_KZ_102354-102535	0	0	10	2	2	0	0	0.00	100.00	0.00	G	A
rs35801418	Plate 1 PD_98647-98740	0	0	86	2	8	0	0	0.00	100.00	0.00	G	A
rs35801418	Plate 2 PD_102271-98764	0	0	91	2	3	0	0	0.00	100.00	0.00	G	A
rs35801418	Plate 3 PD_102271-98766	0	0	56	2	2	0	0	0.00	100.00	0.00	G	A
rs35870237		0	0	0	0	0	0	0	0.00	0.00	0.00	C	T
rs35870237	PD_Controls 1_KZ_102336-102435	0	0	91	2	3	0	0	0.00	100.00	0.00	C	T
rs35870237	PD_Controls 2_KZ_102438-102533	0	0	92	2	2	0	0	0.00	100.00	0.00	C	T
rs35870237	PD_Controls 3_KZ_102354-102535	0	0	12	2	0	0	0	0.00	100.00	0.00	C	T
rs35870237	Plate 1 PD_98647-98740	0	0	85	2	9	0	0	0.00	100.00	0.00	C	T
rs35870237	Plate 2 PD_102271-98764	0	0	93	2	1	0	0	0.00	100.00	0.00	C	T
rs35870237	Plate 3 PD_102271-98766	0	0	55	2	3	0	0	0.00	100.00	0.00	C	T
rs34637584		0	0	0	0	0	0	0	0.00	0.00	0.00	A	G
rs34637584	PD_Controls 1_KZ_102336-102435	0	0	93	2	1	0	0	0.00	100.00	0.00	A	G
rs34637584	PD_Controls 2_KZ_102438-102533	0	0	91	2	3	0	0	0.00	100.00	0.00	A	G
rs34637584	PD_Controls 3_KZ_102354-102535	0	0	12	2	0	0	0	0.00	100.00	0.00	A	G
rs34637584	Plate 1 PD_98647-98740	0	0	87	2	7	0	0	0.00	100.00	0.00	A	G
rs34637584	Plate 2 PD_102271-98764	0	0	93	2	1	0	0	0.00	100.00	0.00	A	G
rs34637584	Plate 3 PD_102271-98766	0	0	56	2	2	0	0	0.00	100.00	0.00	A	G
rs34778348		0	0	0	0	0	0	0	0.00	0.00	0.00	A	G
rs34778348	PD_Controls 1_KZ_102336-102435	0	2	90	2	2	0	0	1.09	98.91	0.01	A	G
rs34778348	PD_Controls 2_KZ_102438-102533	0	0	92	2	2	0	0	0.00	100.00	0.00	A	G
rs34778348	PD_Controls 3_KZ_102354-102535	0	0	12	2	0	0	0	0.00	100.00	0.00	A	G
rs34778348	Plate 1 PD_98647-98740	0	0	85	2	9	0	0	0.00	100.00	0.00	A	G
rs34778348	Plate 2 PD_102271-98764	0	2	92	2	0	0	0	1.06	98.94	0.01	A	G
rs34778348	Plate 3 PD_102271-98766	0	0	54	2	4	0	0	0.00	100.00	0.00	A	G
rs33949390	PD_Controls 1_KZ_102336-102435	0	2	186	4	0	0	0	0.53	99.47	0.01	C	G
rs33949390	PD_Controls 2_KZ_102438-102533	0	0	186	4	2	0	0	0.00	100.00	0.00	C	G
rs33949390	PD_Controls 3_KZ_102354-102535	0	0	22	4	2	0	0	0.00	100.00	0.00	C	G
rs33949390	Plate 1 PD_98647-98740	0	0	166	4	22	0	0	0.00	100.00	0.00	C	G
rs33949390	Plate 2 PD_102271-98764	0	0	188	4	0	0	0	0.00	100.00	0.00	C	G
rs33949390	Plate 3 PD_102271-98766	0	0	112	4	4	0	0	0.00	100.00	0.00	C	G
rs33949390		0	0	0	0	0	0	0	0.00	0.00	0.00	C	G
rs74163686		0	0	0	0	0	0	0	0.00	0.00	0.00	C	A
rs74163686	PD_Controls 1_KZ_102336-102435	0	0	93	2	1	0	0	0.00	100.00	0.00	C	A
rs74163686	PD_Controls 2_KZ_102438-102533	0	0	93	2	1	0	0	0.00	100.00	0.00	C	A
rs74163686	PD_Controls 3_KZ_102354-102535	0	0	12	2	0	0	0	0.00	100.00	0.00	C	A
rs74163686	Plate 1 PD_98647-98740	0	0	86	2	8	0	0	0.00	100.00	0.00	C	A
rs74163686	Plate 2 PD_102271-98764	0	0	94	2	0	0	0	0.00	100.00	0.00	C	A
rs74163686	Plate 3 PD_102271-98766	0	0	56	2	2	0	0	0.00	100.00	0.00	C	A
rs34995376		0	0	0	0	0	0	0	0.00	0.00	0.00	A	G
rs34995376	PD_Controls 1_KZ_102336-102435	0	0	94	2	0	0	0	0.00	100.00	0.00	A	G
rs34995376	PD_Controls 2_KZ_102438-102533	0	0	93	2	1	0	0	0.00	100.00	0.00	A	G
rs34995376	PD_Controls 3_KZ_102354-102535	0	0	12	2	0	0	0	0.00	100.00	0.00	A	G
rs34995376	Plate 1 PD_98647-98740	0	0	77	2	17	0	0	0.00	100.00	0.00	A	G
rs34995376	Plate 2 PD_102271-98764	0	0	94	2	0	0	0	0.00	100.00	0.00	A	G
rs34995376	Plate 3 PD_102271-98766	0	0	56	2	2	0	0	0.00	100.00	0.00	A	G
rs34594498		0	0	0	0	0	0	0	0.00	0.00	0.00	T	C
rs34594498	PD_Controls 1_KZ_102336-102435	0	2	91	2	1	0	0	1.08	98.92	0.01	T	C
rs34594498	PD_Controls 2_KZ_102438-102533	0	1	92	2	1	0	0	0.54	99.46	0.00	T	C
rs34594498	PD_Controls 3_KZ_102354-102535	0	1	11	2	0	0	0	4.17	95.83	0.02	T	C
rs34594498	Plate 1 PD_98647-98740	0	3	87	2	4	0	0	1.67	98.33	0.03	T	C
rs34594498	Plate 2 PD_102271-98764	1	2	91	2	0	0	0	2.13	97.87	22.49	T	C
rs34594498	Plate 3 PD_102271-98766	0	3	53	2	2	0	0	2.68	97.32	0.04	T	C
DNA
MasterPlate	Density	Barcode
PD_Controls 1_KZ_102336-102435	96	3333706
PD_Controls 2_KZ_102438-102533	96	3333707
PD_Controls 3_KZ_102354-102535	96	3333708
Plate 1 PD_98647-98740	96	3333709
Plate 2 PD_102271-98764	96	3333710
Plate 3 PD_102271-98766	96	3333711
# Please note: AL1=AlleleY axis and AL2=AlleleX axis. Allele Y is defined before allele X in the following header;
SNPs
SNPID	SNPNum	AlleleY	AlleleX	Sequence
rs33949390	14140012	C	G	AGGGCATTATTTCGC[G/C]TAGAGATGTGGAAA
rs34594498	22210002	T	C	TTTTCCAGGCATCTG[C/T]GAATGCATTGTCAA
rs34637584	14140010	A	G	AAGATTGCTGACTAC[G/A]GCATTGCTCAGTAC
rs34778348	14140011	A	G	ACTGAAAAACTCTGT[G/A]GACTAATAGACTGC
rs34995376	14140014	A	G	TTTCCCTCCAGGCTC[G/A]CGCTTCTTCTTCCC
rs35801418	6802856	G	A	TATATGAAATGCCTT[A/G]TTTTCCAATGGGAT
rs35870237	14140009	C	T	TTGCTGACTACGGCA[T/C]TGCTCAGTACTGCT
rs74163686	14140013	C	A	AAGCCTTGGCTCTTC[A/C]ATATAAAGGTGATT
Scaling
DaughterPlate	SNPNum	Xmin	Xmax	Ymin	Ymax	Notes	Reader
4809900	6802856	0.04689	6.57802	0.24663	4.44254		PHERA4_1536_KASP
4915002	6802856	0.16429	0.97056	0.12731	3.46055		PHERA5_1536_KASP
4809901	14140009	0.15133	6.43115	0.35022	5.72911		PHERA4_1536_KASP
4915004	14140009	0.46840	2.40896	1.10334	6.06912		PHERA_7_1536_KAS
4809903	14140010	0.19399	6.62913	0.48438	5.30652		PHERA4_1536_KASP
4864050	14140010	0.20803	0.93381	0.13463	1.64188		PHERA8_1536_KASP
4809903	14140011	0.11179	6.72480	0.36904	5.72443		PHERA4_1536_KASP
4915002	14140011	0.46577	2.45627	1.26689	5.61087		PHERA_7_1536_KAS
4864050	14140012	0.40028	2.31817	1.13651	5.67163		PHERA_7_1536_KAS
4893656	14140012	0.04736	3.13992	0.81564	5.32789		PHERA_7_1536_KAS
4809901	14140013	0.09373	6.52302	0.23862	5.98526		PHERA4_1536_KASP
4915002	14140013	0.44520	2.67929	1.06753	7.81902		PHERA_7_1536_KAS
4809900	14140014	0.78076	6.91579	1.05290	5.77975		PHERA_1_1536_KAS
4915002	14140014	0.49076	2.49819	1.09192	7.89924		PHERA_7_1536_KAS
4809905	22210002	0.25232	2.98273	1.01120	5.25296		PHERA_7_1536_KAS
4864050	22210002	0.50228	2.25793	0.98319	5.92976		PHERA_7_1536_KAS
Data
DaughterPlate	MasterPlate	MasterWell	Call	X	Y	SNPID	SubjectID	Norm	Carrier	DaughterWell	LongID	AliquotID
4809900	Plate 1 PD_98647-98740	A01	A:A	3.93438	0.53586	rs35801418	98647			C03
4809900	Plate 1 PD_98647-98740	B01	?	2.39178	0.64788	rs35801418	98648			G03
4809900	Plate 1 PD_98647-98740	C01	?	1.99990	0.59804	rs35801418	98649			K03
4809900	Plate 1 PD_98647-98740	D01	A:A	5.05687	0.57807	rs35801418	98650			O03
4809900	Plate 1 PD_98647-98740	E01	A:A	3.66728	0.46193	rs35801418	98651			S03
4809900	Plate 1 PD_98647-98740	F01	A:A	5.17949	0.61223	rs35801418	98652			W03
4809900	Plate 1 PD_98647-98740	G01	A:A	5.23147	0.52202	rs35801418	98653			AA03
4809900	Plate 1 PD_98647-98740	H01	A:A	4.15772	0.60046	rs35801418	98654			AE03
4809900	Plate 1 PD_98647-98740	A02	?	1.83172	0.54176	rs35801418	98655			C07
4809900	Plate 1 PD_98647-98740	B02	A:A	5.01605	0.48461	rs35801418	98656			G07
4809900	Plate 1 PD_98647-98740	C02	A:A	5.32546	0.48955	rs35801418	98657			K07
4809900	Plate 1 PD_98647-98740	D02	A:A	5.22213	0.52480	rs35801418	98658			O07
4809900	Plate 1 PD_98647-98740	E02	A:A	5.47322	0.54022	rs35801418	98659			S07
4809900	Plate 1 PD_98647-98740	F02	A:A	4.83280	0.58671	rs35801418	98660			W07
4809900	Plate 1 PD_98647-98740	G02	A:A	5.36676	0.52118	rs35801418	98661			AA07
4809900	Plate 1 PD_98647-98740	H02	A:A	5.41623	0.50708	rs35801418	98662			AE07
4809900	Plate 1 PD_98647-98740	A03	A:A	5.52207	0.63741	rs35801418	98663			C11
4809900	Plate 1 PD_98647-98740	B03	A:A	5.31363	0.68425	rs35801418	98664			G11
4809900	Plate 1 PD_98647-98740	C03	A:A	5.79792	0.55346	rs35801418	98665			K11
4809900	Plate 1 PD_98647-98740	D03	A:A	5.70843	0.78963	rs35801418	98666			O11
4809900	Plate 1 PD_98647-98740	E03	A:A	5.87336	0.74258	rs35801418	98667			S11
4809900	Plate 1 PD_98647-98740	F03	A:A	5.44071	0.59780	rs35801418	98668			W11
4809900	Plate 1 PD_98647-98740	G03	A:A	5.54911	0.70030	rs35801418	98669			AA11
4809900	Plate 1 PD_98647-98740	H03	A:A	4.79212	0.50242	rs35801418	98670			AE11
4809900	Plate 1 PD_98647-98740	A04	A:A	5.49729	0.61311	rs35801418	98671			C15
4809900	Plate 1 PD_98647-98740	B04	A:A	5.34356	0.53016	rs35801418	98672			G15
4809900	Plate 1 PD_98647-98740	C04	?	0.29141	0.87877	rs35801418	98673			K15
4809900	Plate 1 PD_98647-98740	D04	A:A	5.31756	0.55647	rs35801418	98674			O15
4809900	Plate 1 PD_98647-98740	E04	?	1.27323	0.60118	rs35801418	98675			S15
4809900	Plate 1 PD_98647-98740	F04	?	0.24616	0.87724	rs35801418	98676			W15
4809900	Plate 1 PD_98647-98740	G04	?	0.34684	0.63639	rs35801418	98677			AA15
4809900	Plate 1 PD_98647-98740	H04	?	0.11971	0.46304	rs35801418	98678			AE15
4809900	Plate 1 PD_98647-98740	A05	A:A	4.97898	0.72704	rs35801418	98679			C19
4809900	Plate 1 PD_98647-98740	B05	A:A	5.78071	0.49921	rs35801418	98680			G19
4809900	Plate 1 PD_98647-98740	C05	A:A	5.29428	0.49891	rs35801418	98681			K19
4809900	Plate 1 PD_98647-98740	D05	A:A	5.88151	0.66155	rs35801418	98682			O19
4809900	Plate 1 PD_98647-98740	E05	A:A	5.04365	0.50158	rs35801418	98683			S19
4809900	Plate 1 PD_98647-98740	F05	A:A	5.32023	0.35983	rs35801418	98684			W19
4809900	Plate 1 PD_98647-98740	G05	A:A	5.29357	0.38636	rs35801418	98685			AA19
4809900	Plate 1 PD_98647-98740	H05	A:A	5.09325	0.64949	rs35801418	98686			AE19
4809900	Plate 1 PD_98647-98740	A06	A:A	5.74094	0.56249	rs35801418	98687			C23
4809900	Plate 1 PD_98647-98740	B06	A:A	5.59816	0.53271	rs35801418	98688			G23
4809900	Plate 1 PD_98647-98740	C06	A:A	5.62899	0.58952	rs35801418	98689			K23
4809900	Plate 1 PD_98647-98740	D06	A:A	5.53686	0.55532	rs35801418	98690			O23
4809900	Plate 1 PD_98647-98740	E06	A:A	5.50726	0.54296	rs35801418	98691			S23
4809900	Plate 1 PD_98647-98740	F06	A:A	5.55845	0.57055	rs35801418	98692			W23
4809900	Plate 1 PD_98647-98740	G06	A:A	5.29649	0.60095	rs35801418	98693			AA23
4809900	Plate 1 PD_98647-98740	H06	A:A	5.73731	0.58056	rs35801418	98694			AE23
4809900	Plate 1 PD_98647-98740	A07	A:A	5.30260	0.67446	rs35801418	98695			C27
4809900	Plate 1 PD_98647-98740	B07	A:A	6.42172	0.74754	rs35801418	98696			G27
4809900	Plate 1 PD_98647-98740	C07	A:A	6.13953	0.60893	rs35801418	98697			K27
4809900	Plate 1 PD_98647-98740	D07	A:A	5.33088	0.85779	rs35801418	98698			O27
4809900	Plate 1 PD_98647-98740	E07	A:A	5.77899	0.53096	rs35801418	98699			S27
4809900	Plate 1 PD_98647-98740	F07	A:A	5.27517	0.58228	rs35801418	98700			W27
4809900	Plate 1 PD_98647-98740	G07	A:A	5.21730	0.47068	rs35801418	98701			AA27
4809900	Plate 1 PD_98647-98740	H07	A:A	4.16034	0.68333	rs35801418	98702			AE27
4809900	Plate 1 PD_98647-98740	A08	A:A	5.55998	0.64046	rs35801418	98703			C31
4809900	Plate 1 PD_98647-98740	B08	A:A	5.85597	0.65855	rs35801418	98704			G31
4809900	Plate 1 PD_98647-98740	C08	A:A	6.11021	0.56255	rs35801418	98705			K31
4809900	Plate 1 PD_98647-98740	D08	A:A	5.41975	0.65231	rs35801418	98706			O31
4809900	Plate 1 PD_98647-98740	E08	A:A	5.63106	0.58423	rs35801418	98707			S31
4809900	Plate 1 PD_98647-98740	F08	A:A	5.41510	0.46484	rs35801418	98708			W31
4809900	Plate 1 PD_98647-98740	G08	A:A	6.57673	0.70892	rs35801418	98709			AA31
4809900	Plate 1 PD_98647-98740	H08	A:A	5.11209	0.58588	rs35801418	98710			AE31
4809900	Plate 1 PD_98647-98740	A09	A:A	5.64454	0.53270	rs35801418	98711			C35
4809900	Plate 1 PD_98647-98740	B09	A:A	5.55514	0.53522	rs35801418	98712			G35
4809900	Plate 1 PD_98647-98740	C09	A:A	5.76068	0.68481	rs35801418	98713			K35
4809900	Plate 1 PD_98647-98740	D09	A:A	5.74219	0.49381	rs35801418	98714			O35
4809900	Plate 1 PD_98647-98740	E09	A:A	5.77189	0.70452	rs35801418	98715			S35
4809900	Plate 1 PD_98647-98740	F09	A:A	5.44914	0.71070	rs35801418	98716			W35
4809900	Plate 1 PD_98647-98740	G09	A:A	5.06232	0.69115	rs35801418	98717			AA35
4809900	Plate 1 PD_98647-98740	H09	A:A	5.62478	0.67762	rs35801418	98718			AE35
4809900	Plate 1 PD_98647-98740	A10	A:A	6.20223	0.43564	rs35801418	98719			C39
4809900	Plate 1 PD_98647-98740	B10	A:A	6.29386	0.64437	rs35801418	98720			G39
4809900	Plate 1 PD_98647-98740	C10	A:A	5.72253	0.58580	rs35801418	98721			K39
4809900	Plate 1 PD_98647-98740	D10	A:A	6.24289	0.53664	rs35801418	98722			O39
4809900	Plate 1 PD_98647-98740	E10	A:A	5.38641	0.52617	rs35801418	98723			S39
4809900	Plate 1 PD_98647-98740	F10	A:A	5.08981	0.45259	rs35801418	98724			W39
4809900	Plate 1 PD_98647-98740	G10	A:A	5.20668	0.51980	rs35801418	98725			AA39
4809900	Plate 1 PD_98647-98740	H10	A:A	5.31387	0.59625	rs35801418	98726			AE39
4809900	Plate 1 PD_98647-98740	A11	A:A	5.54989	0.37575	rs35801418	98727			C43
4809900	Plate 1 PD_98647-98740	B11	A:A	5.26387	0.44773	rs35801418	98728			G43
4809900	Plate 1 PD_98647-98740	C11	A:A	5.24434	0.44817	rs35801418	98729			K43
4809900	Plate 1 PD_98647-98740	D11	A:A	5.50530	0.54708	rs35801418	98730			O43
4809900	Plate 1 PD_98647-98740	E11	A:A	5.53851	0.51903	rs35801418	98731			S43
4809900	Plate 1 PD_98647-98740	F11	A:A	5.10009	0.35198	rs35801418	98732			W43
4809900	Plate 1 PD_98647-98740	G11	A:A	5.31642	0.52079	rs35801418	98733			AA43
4809900	Plate 1 PD_98647-98740	H11	A:A	5.43866	0.58093	rs35801418	98734			AE43
4809900	Plate 1 PD_98647-98740	A12	A:A	5.69847	0.63838	rs35801418	98735			C47
4809900	Plate 1 PD_98647-98740	B12	A:A	5.66007	0.53881	rs35801418	98736			G47
4809900	Plate 1 PD_98647-98740	C12	A:A	5.66133	0.67822	rs35801418	98737			K47
4809900	Plate 1 PD_98647-98740	D12	A:A	5.59041	0.47517	rs35801418	98738			O47
4809900	Plate 1 PD_98647-98740	E12	A:A	5.64189	0.64551	rs35801418	98739			S47
4809900	Plate 1 PD_98647-98740	F12	A:A	5.14647	0.42514	rs35801418	98740			W47
4809900	Plate 1 PD_98647-98740	G12	NTC	0.18660	0.71599	rs35801418				AA47
4809900	Plate 1 PD_98647-98740	H12	NTC	0.16160	0.72953	rs35801418				AE47
4809900	Plate 2 PD_102271-98764	A01	A:A	5.83109	0.50138	rs35801418	102171			A02
4809900	Plate 2 PD_102271-98764	B01	A:A	5.39191	0.41204	rs35801418	102172			E02
4809900	Plate 2 PD_102271-98764	C01	A:A	5.13356	0.45358	rs35801418	102173			I02
4809900	Plate 2 PD_102271-98764	D01	A:A	5.84815	0.64876	rs35801418	102174			M02
4809900	Plate 2 PD_102271-98764	E01	A:A	5.40368	0.48938	rs35801418	102175			Q02
4809900	Plate 2 PD_102271-98764	F01	A:A	4.74511	0.48526	rs35801418	102176			U02
4809900	Plate 2 PD_102271-98764	G01	A:A	5.11906	0.35336	rs35801418	102177			Y02
4809900	Plate 2 PD_102271-98764	H01	A:A	5.39121	0.54547	rs35801418	102178			AC02
4809900	Plate 2 PD_102271-98764	A02	A:A	5.47465	0.49206	rs35801418	102179			A06
4809900	Plate 2 PD_102271-98764	B02	A:A	5.76275	0.71585	rs35801418	102180			E06
4809900	Plate 2 PD_102271-98764	C02	A:A	5.43969	0.50408	rs35801418	102181			I06
4809900	Plate 2 PD_102271-98764	D02	A:A	5.95023	0.60301	rs35801418	102182			M06
4809900	Plate 2 PD_102271-98764	E02	A:A	5.39336	0.66008	rs35801418	102183			Q06
4809900	Plate 2 PD_102271-98764	F02	A:A	5.31184	0.56364	rs35801418	102184			U06
4809900	Plate 2 PD_102271-98764	G02	A:A	6.37118	0.73113	rs35801418	102185			Y06
4809900	Plate 2 PD_102271-98764	H02	A:A	5.66398	0.50108	rs35801418	102186			AC06
4809900	Plate 2 PD_102271-98764	A03	A:A	4.99493	0.41529	rs35801418	102187			A10
4809900	Plate 2 PD_102271-98764	B03	A:A	5.34557	0.65276	rs35801418	102189			E10
4809900	Plate 2 PD_102271-98764	C03	A:A	5.17781	0.45252	rs35801418	102190			I10
4809900	Plate 2 PD_102271-98764	D03	A:A	6.01169	0.67693	rs35801418	102191			M10
4809900	Plate 2 PD_102271-98764	E03	A:A	5.43361	0.43556	rs35801418	102192			Q10
4809900	Plate 2 PD_102271-98764	F03	A:A	4.64717	0.47947	rs35801418	102193			U10
4809900	Plate 2 PD_102271-98764	G03	A:A	5.16967	0.42744	rs35801418	102194			Y10
4809900	Plate 2 PD_102271-98764	H03	A:A	5.40111	0.44394	rs35801418	102195			AC10
4809900	Plate 2 PD_102271-98764	A04	A:A	5.53436	0.60904	rs35801418	102196			A14
4809900	Plate 2 PD_102271-98764	B04	A:A	5.28380	0.63003	rs35801418	102197			E14
4809900	Plate 2 PD_102271-98764	C04	A:A	6.57802	0.65245	rs35801418	102198			I14
4809900	Plate 2 PD_102271-98764	D04	A:A	5.68561	0.47028	rs35801418	102199			M14
4809900	Plate 2 PD_102271-98764	E04	A:A	4.91728	0.47444	rs35801418	102200			Q14
4809900	Plate 2 PD_102271-98764	F04	A:A	5.33124	0.52326	rs35801418	102201			U14
4809900	Plate 2 PD_102271-98764	G04	A:A	5.32213	0.50109	rs35801418	102202			Y14
4809900	Plate 2 PD_102271-98764	H04	A:A	5.79990	0.60962	rs35801418	102203			AC14
4809900	Plate 2 PD_102271-98764	A05	A:A	5.86286	0.66410	rs35801418	102204			A18
4809900	Plate 2 PD_102271-98764	B05	A:A	5.80624	0.50053	rs35801418	102205			E18
4809900	Plate 2 PD_102271-98764	C05	A:A	6.05814	0.65900	rs35801418	102206			I18
4809900	Plate 2 PD_102271-98764	D05	A:A	5.45969	0.57682	rs35801418	102207			M18
4809900	Plate 2 PD_102271-98764	E05	A:A	5.88002	0.49800	rs35801418	102208			Q18
4809900	Plate 2 PD_102271-98764	F05	A:A	5.42504	0.46394	rs35801418	102209			U18
4809900	Plate 2 PD_102271-98764	G05	A:A	5.21066	0.56330	rs35801418	102210			Y18
4809900	Plate 2 PD_102271-98764	H05	A:A	5.28661	0.53954	rs35801418	102211			AC18
4809900	Plate 2 PD_102271-98764	A06	A:A	5.60772	0.85477	rs35801418	102212			A22
4809900	Plate 2 PD_102271-98764	B06	A:A	5.91097	0.60121	rs35801418	102213			E22
4809900	Plate 2 PD_102271-98764	C06	A:A	6.50666	0.67876	rs35801418	102214			I22
4809900	Plate 2 PD_102271-98764	D06	A:A	6.19081	0.57142	rs35801418	102215			M22
4809900	Plate 2 PD_102271-98764	E06	A:A	5.75037	0.64620	rs35801418	102216			Q22
4809900	Plate 2 PD_102271-98764	F06	A:A	6.27352	0.63821	rs35801418	102217			U22
4809900	Plate 2 PD_102271-98764	G06	A:A	5.62462	0.37312	rs35801418	102218			Y22
4809900	Plate 2 PD_102271-98764	H06	A:A	5.15440	0.64944	rs35801418	102219			AC22
4809900	Plate 2 PD_102271-98764	A07	A:A	5.54685	0.60811	rs35801418	102221			A26
4809900	Plate 2 PD_102271-98764	B07	A:A	5.04590	0.59518	rs35801418	102222			E26
4809900	Plate 2 PD_102271-98764	C07	A:A	5.28829	0.59683	rs35801418	102223			I26
4809900	Plate 2 PD_102271-98764	D07	A:A	5.45372	0.62560	rs35801418	102224			M26
4809900	Plate 2 PD_102271-98764	E07	A:A	5.66545	0.61948	rs35801418	102225			Q26
4809900	Plate 2 PD_102271-98764	F07	A:A	6.48602	0.73150	rs35801418	102226			U26
4809900	Plate 2 PD_102271-98764	G07	A:A	5.44213	0.50932	rs35801418	102227			Y26
4809900	Plate 2 PD_102271-98764	H07	A:A	5.17022	0.62471	rs35801418	102228			AC26
4809900	Plate 2 PD_102271-98764	A08	A:A	5.44701	0.65709	rs35801418	102229			A30
4809900	Plate 2 PD_102271-98764	B08	A:A	6.16794	0.74079	rs35801418	102230			E30
4809900	Plate 2 PD_102271-98764	C08	A:A	5.56622	0.51680	rs35801418	102231			I30
4809900	Plate 2 PD_102271-98764	D08	A:A	6.41842	0.84286	rs35801418	102232			M30
4809900	Plate 2 PD_102271-98764	E08	A:A	5.02244	0.66334	rs35801418	102233			Q30
4809900	Plate 2 PD_102271-98764	F08	A:A	5.46740	0.66330	rs35801418	102234			U30
4809900	Plate 2 PD_102271-98764	G08	?	3.29047	0.91260	rs35801418	102235			Y30
4809900	Plate 2 PD_102271-98764	H08	A:A	5.36154	0.48028	rs35801418	102236			AC30
4809900	Plate 2 PD_102271-98764	A09	A:A	5.63508	0.52363	rs35801418	102237			A34
4809900	Plate 2 PD_102271-98764	B09	A:A	5.80399	0.49134	rs35801418	102238			E34
4809900	Plate 2 PD_102271-98764	C09	A:A	5.69556	0.45903	rs35801418	102239			I34
4809900	Plate 2 PD_102271-98764	D09	A:A	5.53676	0.53752	rs35801418	102241			M34
4809900	Plate 2 PD_102271-98764	E09	A:A	5.54523	0.55079	rs35801418	102242			Q34
4809900	Plate 2 PD_102271-98764	F09	A:A	5.44778	0.51877	rs35801418	102243			U34
4809900	Plate 2 PD_102271-98764	G09	?	3.24140	1.25163	rs35801418	102244			Y34
4809900	Plate 2 PD_102271-98764	H09	A:A	5.18807	0.42383	rs35801418	102245			AC34
4809900	Plate 2 PD_102271-98764	A10	A:A	5.93719	0.55265	rs35801418	102246			A38
4809900	Plate 2 PD_102271-98764	B10	A:A	5.44914	0.48977	rs35801418	102247			E38
4809900	Plate 2 PD_102271-98764	C10	A:A	5.26820	0.57461	rs35801418	102248			I38
4809900	Plate 2 PD_102271-98764	D10	A:A	6.12491	0.39325	rs35801418	102249			M38
4809900	Plate 2 PD_102271-98764	E10	?	5.99908	1.17729	rs35801418	102250			Q38
4809900	Plate 2 PD_102271-98764	F10	A:A	5.93915	0.69399	rs35801418	102251			U38
4809900	Plate 2 PD_102271-98764	G10	A:A	5.34119	0.56249	rs35801418	102252			Y38
4809900	Plate 2 PD_102271-98764	H10	A:A	5.48810	0.46999	rs35801418	102253			AC38
4809900	Plate 2 PD_102271-98764	A11	A:A	5.55243	0.50673	rs35801418	102254			A42
4809900	Plate 2 PD_102271-98764	B11	A:A	5.69713	0.63384	rs35801418	102256			E42
4809900	Plate 2 PD_102271-98764	C11	A:A	6.22088	0.57178	rs35801418	102258			I42
4809900	Plate 2 PD_102271-98764	D11	A:A	5.69495	0.58203	rs35801418	102259			M42
4809900	Plate 2 PD_102271-98764	E11	A:A	5.92804	0.53965	rs35801418	102260			Q42
4809900	Plate 2 PD_102271-98764	F11	A:A	6.06807	0.63858	rs35801418	102263			U42
4809900	Plate 2 PD_102271-98764	G11	A:A	6.17705	0.51889	rs35801418	102265			Y42
4809900	Plate 2 PD_102271-98764	H11	A:A	5.05698	0.38309	rs35801418	102267			AC42
4809900	Plate 2 PD_102271-98764	A12	A:A	5.15397	0.73095	rs35801418	102269			A46
4809900	Plate 2 PD_102271-98764	B12	A:A	6.28292	0.55002	rs35801418	102270			E46
4809900	Plate 2 PD_102271-98764	C12	A:A	5.67964	0.59224	rs35801418	102240			I46
4809900	Plate 2 PD_102271-98764	D12	A:A	5.93871	0.71278	rs35801418	98762			M46
4809900	Plate 2 PD_102271-98764	E12	A:A	5.64505	0.56533	rs35801418	98763			Q46
4809900	Plate 2 PD_102271-98764	F12	A:A	5.34613	0.65664	rs35801418	98764			U46
4809900	Plate 2 PD_102271-98764	G12	NTC	0.79678	0.47058	rs35801418				Y46
4809900	Plate 2 PD_102271-98764	H12	NTC	0.10870	0.41750	rs35801418				AC46
4809900	Plate 3 PD_102271-98766	A01	A:A	5.32322	0.61437	rs35801418	102271			A04
4809900	Plate 3 PD_102271-98766	B01	A:A	5.36487	0.51067	rs35801418	102272			E04
4809900	Plate 3 PD_102271-98766	C01	A:A	5.60368	0.45984	rs35801418	102273			I04
4809900	Plate 3 PD_102271-98766	D01	A:A	5.81424	0.57635	rs35801418	102275			M04
4809900	Plate 3 PD_102271-98766	E01	A:A	5.83671	0.36516	rs35801418	102276			Q04
4809900	Plate 3 PD_102271-98766	F01	A:A	5.77846	0.46201	rs35801418	102277			U04
4809900	Plate 3 PD_102271-98766	G01	A:A	5.09081	0.66118	rs35801418	102280			Y04
4809900	Plate 3 PD_102271-98766	H01	A:A	5.03998	0.49906	rs35801418	102281			AC04
4809900	Plate 3 PD_102271-98766	A02	A:A	4.99071	0.40702	rs35801418	102282			A08
4809900	Plate 3 PD_102271-98766	B02	A:A	6.42765	0.65999	rs35801418	102284			E08
4809900	Plate 3 PD_102271-98766	C02	A:A	5.19611	0.60841	rs35801418	102285			I08
4809900	Plate 3 PD_102271-98766	D02	A:A	5.89433	0.79012	rs35801418	102286			M08
4809900	Plate 3 PD_102271-98766	E02	A:A	5.28840	0.64885	rs35801418	102287			Q08
4809900	Plate 3 PD_102271-98766	F02	A:A	5.70741	0.59182	rs35801418	102288			U08
4809900	Plate 3 PD_102271-98766	G02	A:A	5.42201	0.70052	rs35801418	102289			Y08
4809900	Plate 3 PD_102271-98766	H02	A:A	5.08065	0.62106	rs35801418	102291			AC08
4809900	Plate 3 PD_102271-98766	A03	A:A	5.09035	0.56607	rs35801418	102292			A12
4809900	Plate 3 PD_102271-98766	B03	A:A	5.67990	0.63532	rs35801418	102293			E12
4809900	Plate 3 PD_102271-98766	C03	A:A	5.20980	0.61265	rs35801418	102294			I12
4809900	Plate 3 PD_102271-98766	D03	A:A	4.97577	0.65216	rs35801418	102295			M12
4809900	Plate 3 PD_102271-98766	E03	A:A	5.44722	0.62987	rs35801418	102296			Q12
4809900	Plate 3 PD_102271-98766	F03	?	0.22725	0.88493	rs35801418	102297			U12
4809900	Plate 3 PD_102271-98766	G03	A:A	5.51603	0.60681	rs35801418	102298			Y12
4809900	Plate 3 PD_102271-98766	H03	A:A	5.69662	0.64688	rs35801418	102300			AC12
4809900	Plate 3 PD_102271-98766	A04	A:A	5.57690	0.83127	rs35801418	102301			A16
4809900	Plate 3 PD_102271-98766	B04	A:A	5.69267	0.43074	rs35801418	102302			E16
4809900	Plate 3 PD_102271-98766	C04	A:A	5.61118	0.62413	rs35801418	102304			I16
4809900	Plate 3 PD_102271-98766	D04	A:A	5.41422	0.58241	rs35801418	102306			M16
4809900	Plate 3 PD_102271-98766	E04	A:A	5.73494	0.58997	rs35801418	102308			Q16
4809900	Plate 3 PD_102271-98766	F04	A:A	4.91044	0.56979	rs35801418	102310			U16
4809900	Plate 3 PD_102271-98766	G04	A:A	5.38817	0.66635	rs35801418	102311			Y16
4809900	Plate 3 PD_102271-98766	H04	A:A	5.92513	0.50834	rs35801418	102312			AC16
4809900	Plate 3 PD_102271-98766	A05	A:A	5.72736	0.36032	rs35801418	102313			A20
4809900	Plate 3 PD_102271-98766	B05	A:A	5.54325	0.65644	rs35801418	102315			E20
4809900	Plate 3 PD_102271-98766	C05	A:A	6.06995	0.51344	rs35801418	102316			I20
4809900	Plate 3 PD_102271-98766	D05	A:A	6.14078	0.60066	rs35801418	102317			M20
4809900	Plate 3 PD_102271-98766	E05	A:A	5.40076	0.79247	rs35801418	102318			Q20
4809900	Plate 3 PD_102271-98766	F05	A:A	5.72331	0.68272	rs35801418	102319			U20
4809900	Plate 3 PD_102271-98766	G05	A:A	5.40159	0.62816	rs35801418	102320			Y20
4809900	Plate 3 PD_102271-98766	H05	A:A	5.58288	0.62840	rs35801418	102321			AC20
4809900	Plate 3 PD_102271-98766	A06	A:A	5.32373	0.52536	rs35801418	102322			A24
4809900	Plate 3 PD_102271-98766	B06	A:A	5.64787	0.59629	rs35801418	102188			E24
4809900	Plate 3 PD_102271-98766	C06	?	0.13802	0.65217	rs35801418	102324			I24
4809900	Plate 3 PD_102271-98766	D06	A:A	5.11779	0.56592	rs35801418	102325			M24
4809900	Plate 3 PD_102271-98766	E06	A:A	5.29645	0.53500	rs35801418	102326			Q24
4809900	Plate 3 PD_102271-98766	F06	A:A	5.68363	0.74234	rs35801418	102327			U24
4809900	Plate 3 PD_102271-98766	G06	A:A	5.23987	0.52228	rs35801418	102328			Y24
4809900	Plate 3 PD_102271-98766	H06	A:A	5.37849	0.68453	rs35801418	102329			AC24
4809900	Plate 3 PD_102271-98766	A07	A:A	5.22820	0.49110	rs35801418	102330			A28
4809900	Plate 3 PD_102271-98766	B07	A:A	5.26897	0.61290	rs35801418	102331			E28
4809900	Plate 3 PD_102271-98766	C07	A:A	5.95222	0.56743	rs35801418	102332			I28
4809900	Plate 3 PD_102271-98766	D07	A:A	5.63775	0.38069	rs35801418	102333			M28
4809900	Plate 3 PD_102271-98766	E07	A:A	5.18902	0.57031	rs35801418	102334			Q28
4809900	Plate 3 PD_102271-98766	F07	A:A	5.37655	0.37824	rs35801418	102335			U28
4809900	Plate 3 PD_102271-98766	G07	A:A	6.03452	0.55360	rs35801418	98760			Y28
4809900	Plate 3 PD_102271-98766	H07	A:A	5.22846	0.54634	rs35801418	98761			AC28
4809900	Plate 3 PD_102271-98766	A08	A:A	5.34023	0.72207	rs35801418	98765			A32
4809900	Plate 3 PD_102271-98766	B08	A:A	5.74027	0.74005	rs35801418	98766			E32
4809900	Plate 3 PD_102271-98766	G12	NTC	0.10443	0.77254	rs35801418				Y48
4809900	Plate 3 PD_102271-98766	H12	NTC	0.18596	0.41600	rs35801418				AC48
4809900	PD_Controls 1_KZ_102336-102435	A01	A:A	5.94433	0.56547	rs35801418	102336			A01
4809900	PD_Controls 1_KZ_102336-102435	B01	A:A	5.23135	0.51598	rs35801418	102345			E01
4809900	PD_Controls 1_KZ_102336-102435	C01	A:A	5.27702	0.62625	rs35801418	102337			I01
4809900	PD_Controls 1_KZ_102336-102435	D01	A:A	5.46972	0.51932	rs35801418	102339			M01
4809900	PD_Controls 1_KZ_102336-102435	E01	A:A	5.46594	0.46769	rs35801418	102341			Q01
4809900	PD_Controls 1_KZ_102336-102435	F01	A:A	4.82215	0.51191	rs35801418	102342			U01
4809900	PD_Controls 1_KZ_102336-102435	G01	A:A	5.29314	0.27774	rs35801418	102343			Y01
4809900	PD_Controls 1_KZ_102336-102435	H01	A:A	5.73284	0.44420	rs35801418	102344			AC01
4809900	PD_Controls 1_KZ_102336-102435	A02	A:A	5.78686	0.59850	rs35801418	102338			A05
4809900	PD_Controls 1_KZ_102336-102435	B02	A:A	5.28978	0.73802	rs35801418	102346			E05
4809900	PD_Controls 1_KZ_102336-102435	C02	A:A	4.99594	0.44277	rs35801418	102347			I05
4809900	PD_Controls 1_KZ_102336-102435	D02	A:A	5.73800	0.60700	rs35801418	102348			M05
4809900	PD_Controls 1_KZ_102336-102435	E02	A:A	5.21559	0.60069	rs35801418	102349			Q05
4809900	PD_Controls 1_KZ_102336-102435	F02	A:A	5.74644	0.80920	rs35801418	102350			U05
4809900	PD_Controls 1_KZ_102336-102435	G02	A:A	4.46602	0.36599	rs35801418	102351			Y05
4809900	PD_Controls 1_KZ_102336-102435	H02	A:A	5.77533	0.67119	rs35801418	102352			AC05
4809900	PD_Controls 1_KZ_102336-102435	A03	A:A	6.33850	0.75952	rs35801418	102353			A09
4809900	PD_Controls 1_KZ_102336-102435	B03	A:A	5.28716	0.51169	rs35801418	102355			E09
4809900	PD_Controls 1_KZ_102336-102435	C03	A:A	5.20977	0.54972	rs35801418	102356			I09
4809900	PD_Controls 1_KZ_102336-102435	D03	A:A	5.22591	0.66654	rs35801418	102358			M09
4809900	PD_Controls 1_KZ_102336-102435	E03	A:A	5.37206	0.50065	rs35801418	102359			Q09
4809900	PD_Controls 1_KZ_102336-102435	F03	A:A	5.68002	0.56283	rs35801418	102360			U09
4809900	PD_Controls 1_KZ_102336-102435	G03	A:A	5.52090	0.54796	rs35801418	102361			Y09
4809900	PD_Controls 1_KZ_102336-102435	H03	A:A	5.28547	0.30308	rs35801418	102362			AC09
4809900	PD_Controls 1_KZ_102336-102435	A04	A:A	5.59881	0.53064	rs35801418	102363			A13
4809900	PD_Controls 1_KZ_102336-102435	B04	A:A	5.58727	0.68297	rs35801418	102364			E13
4809900	PD_Controls 1_KZ_102336-102435	C04	A:A	5.54814	0.54959	rs35801418	102365			I13
4809900	PD_Controls 1_KZ_102336-102435	D04	A:A	5.86284	0.72345	rs35801418	102366			M13
4809900	PD_Controls 1_KZ_102336-102435	E04	A:A	5.15284	0.68566	rs35801418	102367			Q13
4809900	PD_Controls 1_KZ_102336-102435	F04	A:A	5.16148	0.51194	rs35801418	102368			U13
4809900	PD_Controls 1_KZ_102336-102435	G04	A:A	5.47408	0.57322	rs35801418	102369			Y13
4809900	PD_Controls 1_KZ_102336-102435	H04	A:A	5.34190	0.47753	rs35801418	102370			AC13
4809900	PD_Controls 1_KZ_102336-102435	A05	A:A	5.97671	0.59717	rs35801418	102371			A17
4809900	PD_Controls 1_KZ_102336-102435	B05	A:A	5.34664	0.47580	rs35801418	102372			E17
4809900	PD_Controls 1_KZ_102336-102435	C05	A:A	6.47155	0.72025	rs35801418	102373			I17
4809900	PD_Controls 1_KZ_102336-102435	D05	A:A	5.79322	0.56604	rs35801418	102374			M17
4809900	PD_Controls 1_KZ_102336-102435	E05	A:A	5.42882	0.55088	rs35801418	102375			Q17
4809900	PD_Controls 1_KZ_102336-102435	F05	A:A	5.75505	0.67071	rs35801418	102376			U17
4809900	PD_Controls 1_KZ_102336-102435	G05	A:A	5.85548	0.61345	rs35801418	102377			Y17
4809900	PD_Controls 1_KZ_102336-102435	H05	A:A	5.13523	0.54345	rs35801418	102378			AC17
4809900	PD_Controls 1_KZ_102336-102435	A06	A:A	6.28300	0.79820	rs35801418	102379			A21
4809900	PD_Controls 1_KZ_102336-102435	B06	A:A	5.30550	0.59425	rs35801418	102380			E21
4809900	PD_Controls 1_KZ_102336-102435	C06	A:A	6.05273	0.59789	rs35801418	102381			I21
4809900	PD_Controls 1_KZ_102336-102435	D06	A:A	5.67062	0.51069	rs35801418	102382			M21
4809900	PD_Controls 1_KZ_102336-102435	E06	A:A	5.99668	0.71574	rs35801418	102383			Q21
4809900	PD_Controls 1_KZ_102336-102435	F06	A:A	5.39894	0.59391	rs35801418	102384			U21
4809900	PD_Controls 1_KZ_102336-102435	G06	A:A	5.75035	0.67504	rs35801418	102385			Y21
4809900	PD_Controls 1_KZ_102336-102435	H06	A:A	5.39530	0.64082	rs35801418	102386			AC21
4809900	PD_Controls 1_KZ_102336-102435	A07	A:A	5.71330	0.44833	rs35801418	102387			A25
4809900	PD_Controls 1_KZ_102336-102435	B07	A:A	5.50363	0.57273	rs35801418	102388			E25
4809900	PD_Controls 1_KZ_102336-102435	C07	A:A	5.34801	0.58024	rs35801418	102389			I25
4809900	PD_Controls 1_KZ_102336-102435	D07	A:A	5.78897	0.54652	rs35801418	102390			M25
4809900	PD_Controls 1_KZ_102336-102435	E07	A:A	5.86578	0.73907	rs35801418	102391			Q25
4809900	PD_Controls 1_KZ_102336-102435	F07	A:A	5.67325	0.72034	rs35801418	102392			U25
4809900	PD_Controls 1_KZ_102336-102435	G07	A:A	5.67803	0.54256	rs35801418	102393			Y25
4809900	PD_Controls 1_KZ_102336-102435	H07	A:A	5.51285	0.63403	rs35801418	102394			AC25
4809900	PD_Controls 1_KZ_102336-102435	A08	A:A	5.56159	0.57867	rs35801418	102395			A29
4809900	PD_Controls 1_KZ_102336-102435	B08	A:A	5.39264	0.61567	rs35801418	102396			E29
4809900	PD_Controls 1_KZ_102336-102435	C08	A:A	5.29003	0.66412	rs35801418	102397			I29
4809900	PD_Controls 1_KZ_102336-102435	D08	A:A	5.64578	0.74806	rs35801418	102398			M29
4809900	PD_Controls 1_KZ_102336-102435	E08	A:A	5.66485	0.44742	rs35801418	102399			Q29
4809900	PD_Controls 1_KZ_102336-102435	F08	A:A	5.41444	0.54407	rs35801418	102400			U29
4809900	PD_Controls 1_KZ_102336-102435	G08	A:A	5.49360	0.49812	rs35801418	102401			Y29
4809900	PD_Controls 1_KZ_102336-102435	H08	A:A	5.30767	0.61899	rs35801418	102402			AC29
4809900	PD_Controls 1_KZ_102336-102435	A09	A:A	5.67629	0.67852	rs35801418	102403			A33
4809900	PD_Controls 1_KZ_102336-102435	B09	A:A	5.32675	0.61776	rs35801418	102413			E33
4809900	PD_Controls 1_KZ_102336-102435	C09	A:A	5.11633	0.55790	rs35801418	102405			I33
4809900	PD_Controls 1_KZ_102336-102435	D09	A:A	5.97711	0.53388	rs35801418	102406			M33
4809900	PD_Controls 1_KZ_102336-102435	E09	?	4.94184	1.20187	rs35801418	102407			Q33
4809900	PD_Controls 1_KZ_102336-102435	F09	A:A	5.62675	0.49780	rs35801418	102408			U33
4809900	PD_Controls 1_KZ_102336-102435	G09	?	1.26865	1.44254	rs35801418	102409			Y33
4809900	PD_Controls 1_KZ_102336-102435	H09	A:A	5.01965	0.52267	rs35801418	102410			AC33
4809900	PD_Controls 1_KZ_102336-102435	A10	A:A	5.50092	0.59363	rs35801418	102411			A37
4809900	PD_Controls 1_KZ_102336-102435	B10	A:A	5.37077	0.53642	rs35801418	102404			E37
4809900	PD_Controls 1_KZ_102336-102435	C10	A:A	6.06156	0.72226	rs35801418	102414			I37
4809900	PD_Controls 1_KZ_102336-102435	D10	A:A	5.48286	0.59364	rs35801418	102415			M37
4809900	PD_Controls 1_KZ_102336-102435	E10	A:A	5.41865	0.74969	rs35801418	102416			Q37
4809900	PD_Controls 1_KZ_102336-102435	F10	A:A	5.15588	0.64479	rs35801418	102417			U37
4809900	PD_Controls 1_KZ_102336-102435	G10	A:A	5.45519	0.54742	rs35801418	102418			Y37
4809900	PD_Controls 1_KZ_102336-102435	H10	A:A	5.05884	0.46079	rs35801418	102420			AC37
4809900	PD_Controls 1_KZ_102336-102435	A11	A:A	5.54690	0.56720	rs35801418	102421			A41
4809900	PD_Controls 1_KZ_102336-102435	B11	A:A	5.19207	0.36995	rs35801418	102422			E41
4809900	PD_Controls 1_KZ_102336-102435	C11	A:A	5.77441	0.57453	rs35801418	102423			I41
4809900	PD_Controls 1_KZ_102336-102435	D11	A:A	5.80289	0.71380	rs35801418	102424			M41
4809900	PD_Controls 1_KZ_102336-102435	E11	A:A	5.83590	0.36881	rs35801418	102425			Q41
4809900	PD_Controls 1_KZ_102336-102435	F11	A:A	5.67886	0.41671	rs35801418	102426			U41
4809900	PD_Controls 1_KZ_102336-102435	G11	A:A	5.66356	0.58670	rs35801418	102427			Y41
4809900	PD_Controls 1_KZ_102336-102435	H11	A:A	5.63099	0.60838	rs35801418	102428			AC41
4809900	PD_Controls 1_KZ_102336-102435	A12	A:A	5.81881	0.59072	rs35801418	102429			A45
4809900	PD_Controls 1_KZ_102336-102435	B12	A:A	5.33499	0.40371	rs35801418	102430			E45
4809900	PD_Controls 1_KZ_102336-102435	C12	A:A	5.63407	0.34433	rs35801418	102431			I45
4809900	PD_Controls 1_KZ_102336-102435	D12	A:A	5.01569	0.58810	rs35801418	102433			M45
4809900	PD_Controls 1_KZ_102336-102435	E12	A:A	6.12123	0.38919	rs35801418	102434			Q45
4809900	PD_Controls 1_KZ_102336-102435	F12	A:A	5.55370	0.48768	rs35801418	102435			U45
4809900	PD_Controls 1_KZ_102336-102435	G12	NTC	0.04689	0.59128	rs35801418				Y45
4809900	PD_Controls 1_KZ_102336-102435	H12	NTC	0.09845	0.74824	rs35801418				AC45
4809900	PD_Controls 2_KZ_102438-102533	A01	A:A	5.40890	0.46475	rs35801418	102438			A03
4809900	PD_Controls 2_KZ_102438-102533	B01	A:A	5.58450	0.69745	rs35801418	102439			E03
4809900	PD_Controls 2_KZ_102438-102533	C01	A:A	5.10200	0.48556	rs35801418	102440			I03
4809900	PD_Controls 2_KZ_102438-102533	D01	A:A	6.24027	0.64130	rs35801418	102441			M03
4809900	PD_Controls 2_KZ_102438-102533	E01	A:A	5.27100	0.43326	rs35801418	102442			Q03
4809900	PD_Controls 2_KZ_102438-102533	F01	?	0.28017	0.68131	rs35801418	102443			U03
4809900	PD_Controls 2_KZ_102438-102533	G01	A:A	4.81678	0.49790	rs35801418	102444			Y03
4809900	PD_Controls 2_KZ_102438-102533	H01	A:A	5.33357	0.35330	rs35801418	102445			AC03
4809900	PD_Controls 2_KZ_102438-102533	A02	A:A	4.95397	0.35774	rs35801418	102446			A07
4809900	PD_Controls 2_KZ_102438-102533	B02	A:A	6.32409	0.72570	rs35801418	102447			E07
4809900	PD_Controls 2_KZ_102438-102533	C02	A:A	5.74515	0.68063	rs35801418	102448			I07
4809900	PD_Controls 2_KZ_102438-102533	D02	A:A	5.71114	0.74599	rs35801418	102449			M07
4809900	PD_Controls 2_KZ_102438-102533	E02	A:A	5.46590	0.60129	rs35801418	102450			Q07
4809900	PD_Controls 2_KZ_102438-102533	F02	A:A	5.64329	0.56369	rs35801418	102451			U07
4809900	PD_Controls 2_KZ_102438-102533	G02	A:A	5.52177	0.65396	rs35801418	102452			Y07
4809900	PD_Controls 2_KZ_102438-102533	H02	A:A	5.75906	0.40130	rs35801418	102453			AC07
4809900	PD_Controls 2_KZ_102438-102533	A03	A:A	5.23702	0.62829	rs35801418	102454			A11
4809900	PD_Controls 2_KZ_102438-102533	B03	A:A	6.01203	0.69362	rs35801418	102455			E11
4809900	PD_Controls 2_KZ_102438-102533	C03	A:A	5.43098	0.61297	rs35801418	102456			I11
4809900	PD_Controls 2_KZ_102438-102533	D03	A:A	5.42498	0.51984	rs35801418	102457			M11
4809900	PD_Controls 2_KZ_102438-102533	E03	A:A	5.64312	0.62812	rs35801418	102458			Q11
4809900	PD_Controls 2_KZ_102438-102533	F03	A:A	5.52906	0.57491	rs35801418	102459			U11
4809900	PD_Controls 2_KZ_102438-102533	G03	A:A	6.26487	0.61774	rs35801418	102460			Y11
4809900	PD_Controls 2_KZ_102438-102533	H03	A:A	5.16161	0.45801	rs35801418	102461			AC11
4809900	PD_Controls 2_KZ_102438-102533	A04	A:A	5.94428	0.75811	rs35801418	102462			A15
4809900	PD_Controls 2_KZ_102438-102533	B04	A:A	5.53485	0.54898	rs35801418	102463			E15
4809900	PD_Controls 2_KZ_102438-102533	C04	A:A	5.74565	0.57546	rs35801418	102464			I15
4809900	PD_Controls 2_KZ_102438-102533	D04	A:A	5.51282	0.60595	rs35801418	102465			M15
4809900	PD_Controls 2_KZ_102438-102533	E04	A:A	4.74877	0.58632	rs35801418	102466			Q15
4809900	PD_Controls 2_KZ_102438-102533	F04	A:A	5.46771	0.55344	rs35801418	102467			U15
4809900	PD_Controls 2_KZ_102438-102533	G04	A:A	5.92736	0.41990	rs35801418	102468			Y15
4809900	PD_Controls 2_KZ_102438-102533	H04	A:A	5.20528	0.55916	rs35801418	102469			AC15
4809900	PD_Controls 2_KZ_102438-102533	A05	A:A	5.85047	0.45609	rs35801418	102470			A19
4809900	PD_Controls 2_KZ_102438-102533	B05	A:A	6.16793	0.60267	rs35801418	102471			E19
4809900	PD_Controls 2_KZ_102438-102533	C05	A:A	5.40405	0.63171	rs35801418	102472			I19
4809900	PD_Controls 2_KZ_102438-102533	D05	A:A	5.98297	0.67487	rs35801418	102473			M19
4809900	PD_Controls 2_KZ_102438-102533	E05	A:A	6.26883	0.70337	rs35801418	102474			Q19
4809900	PD_Controls 2_KZ_102438-102533	F05	A:A	5.30166	0.47633	rs35801418	102475			U19
4809900	PD_Controls 2_KZ_102438-102533	G05	A:A	4.91917	0.40229	rs35801418	102476			Y19
4809900	PD_Controls 2_KZ_102438-102533	H05	A:A	5.57604	0.46057	rs35801418	102478			AC19
4809900	PD_Controls 2_KZ_102438-102533	A06	A:A	5.78716	0.61397	rs35801418	102479			A23
4809900	PD_Controls 2_KZ_102438-102533	B06	A:A	6.36527	0.71243	rs35801418	102480			E23
4809900	PD_Controls 2_KZ_102438-102533	C06	A:A	5.39845	0.59600	rs35801418	102481			I23
4809900	PD_Controls 2_KZ_102438-102533	D06	A:A	5.72365	0.64465	rs35801418	102482			M23
4809900	PD_Controls 2_KZ_102438-102533	E06	A:A	5.58552	0.48765	rs35801418	102483			Q23
4809900	PD_Controls 2_KZ_102438-102533	F06	A:A	5.92153	0.56120	rs35801418	102484			U23
4809900	PD_Controls 2_KZ_102438-102533	G06	A:A	5.44051	0.58827	rs35801418	102485			Y23
4809900	PD_Controls 2_KZ_102438-102533	H06	A:A	4.81273	0.48550	rs35801418	102486			AC23
4809900	PD_Controls 2_KZ_102438-102533	A07	A:A	6.35273	0.76406	rs35801418	102487			A27
4809900	PD_Controls 2_KZ_102438-102533	B07	A:A	5.56361	0.58363	rs35801418	102488			E27
4809900	PD_Controls 2_KZ_102438-102533	C07	A:A	6.01141	0.58224	rs35801418	102489			I27
4809900	PD_Controls 2_KZ_102438-102533	D07	A:A	5.56987	0.60213	rs35801418	102490			M27
4809900	PD_Controls 2_KZ_102438-102533	E07	A:A	5.12410	0.52502	rs35801418	102492			Q27
4809900	PD_Controls 2_KZ_102438-102533	F07	A:A	5.37960	0.56212	rs35801418	102493			U27
4809900	PD_Controls 2_KZ_102438-102533	G07	A:A	5.40669	0.24663	rs35801418	102494			Y27
4809900	PD_Controls 2_KZ_102438-102533	H07	A:A	5.58905	0.60476	rs35801418	102495			AC27
4809900	PD_Controls 2_KZ_102438-102533	A08	A:A	6.05680	0.73913	rs35801418	102496			A31
4809900	PD_Controls 2_KZ_102438-102533	B08	A:A	5.92581	0.54431	rs35801418	102497			E31
4809900	PD_Controls 2_KZ_102438-102533	C08	A:A	5.89478	0.57138	rs35801418	102498			I31
4809900	PD_Controls 2_KZ_102438-102533	D08	A:A	5.78288	0.59041	rs35801418	102499			M31
4809900	PD_Controls 2_KZ_102438-102533	E08	A:A	5.24221	0.53583	rs35801418	102500			Q31
4809900	PD_Controls 2_KZ_102438-102533	F08	A:A	5.43487	0.50397	rs35801418	102501			U31
4809900	PD_Controls 2_KZ_102438-102533	G08	A:A	5.70174	0.53644	rs35801418	102502			Y31
4809900	PD_Controls 2_KZ_102438-102533	H08	A:A	5.08204	0.51552	rs35801418	102503			AC31
4809900	PD_Controls 2_KZ_102438-102533	A09	A:A	5.91644	0.76220	rs35801418	102504			A35
4809900	PD_Controls 2_KZ_102438-102533	B09	A:A	5.99533	0.40691	rs35801418	102505			E35
4809900	PD_Controls 2_KZ_102438-102533	C09	A:A	5.88137	0.63846	rs35801418	102506			I35
4809900	PD_Controls 2_KZ_102438-102533	D09	A:A	5.91042	0.64616	rs35801418	102507			M35
4809900	PD_Controls 2_KZ_102438-102533	E09	A:A	5.94621	0.71531	rs35801418	102508			Q35
4809900	PD_Controls 2_KZ_102438-102533	F09	A:A	5.72092	0.42400	rs35801418	102509			U35
4809900	PD_Controls 2_KZ_102438-102533	G09	A:A	5.72863	0.67821	rs35801418	102510			Y35
4809900	PD_Controls 2_KZ_102438-102533	H09	A:A	5.12306	0.73961	rs35801418	102511			AC35
4809900	PD_Controls 2_KZ_102438-102533	A10	A:A	5.32618	0.54718	rs35801418	102512			A39
4809900	PD_Controls 2_KZ_102438-102533	B10	A:A	5.11985	0.42532	rs35801418	102513			E39
4809900	PD_Controls 2_KZ_102438-102533	C10	A:A	5.69414	0.58611	rs35801418	102514			I39
4809900	PD_Controls 2_KZ_102438-102533	D10	A:A	5.65026	0.47916	rs35801418	102515			M39
4809900	PD_Controls 2_KZ_102438-102533	E10	A:A	5.28670	0.62152	rs35801418	102516			Q39
4809900	PD_Controls 2_KZ_102438-102533	F10	A:A	5.44027	0.44255	rs35801418	102517			U39
4809900	PD_Controls 2_KZ_102438-102533	G10	A:A	5.09768	0.47814	rs35801418	102518			Y39
4809900	PD_Controls 2_KZ_102438-102533	H10	A:A	5.30800	0.60228	rs35801418	102519			AC39
4809900	PD_Controls 2_KZ_102438-102533	A11	A:A	5.09017	0.44522	rs35801418	102520			A43
4809900	PD_Controls 2_KZ_102438-102533	B11	A:A	5.49721	0.64223	rs35801418	102521			E43
4809900	PD_Controls 2_KZ_102438-102533	C11	A:A	5.88287	0.62420	rs35801418	102522			I43
4809900	PD_Controls 2_KZ_102438-102533	D11	A:A	5.33465	0.51338	rs35801418	102523			M43
4809900	PD_Controls 2_KZ_102438-102533	E11	A:A	5.94887	0.60048	rs35801418	102524			Q43
4809900	PD_Controls 2_KZ_102438-102533	F11	A:A	5.40416	0.38767	rs35801418	102525			U43
4809900	PD_Controls 2_KZ_102438-102533	G11	A:A	6.40255	0.74577	rs35801418	102526			Y43
4809900	PD_Controls 2_KZ_102438-102533	H11	A:A	5.20980	0.42542	rs35801418	102527			AC43
4809900	PD_Controls 2_KZ_102438-102533	A12	A:A	5.58661	0.67044	rs35801418	102528			A47
4809900	PD_Controls 2_KZ_102438-102533	B12	A:A	6.49450	0.52539	rs35801418	102529			E47
4809900	PD_Controls 2_KZ_102438-102533	C12	A:A	5.44783	0.49299	rs35801418	102530			I47
4809900	PD_Controls 2_KZ_102438-102533	D12	A:A	5.43425	0.64415	rs35801418	102531			M47
4809900	PD_Controls 2_KZ_102438-102533	E12	A:A	5.41382	0.54470	rs35801418	102532			Q47
4809900	PD_Controls 2_KZ_102438-102533	F12	A:A	5.99436	0.59042	rs35801418	102533			U47
4809900	PD_Controls 2_KZ_102438-102533	G12	NTC	0.16806	0.37797	rs35801418				Y47
4809900	PD_Controls 2_KZ_102438-102533	H12	NTC	0.16515	0.63080	rs35801418				AC47
4809900	PD_Controls 3_KZ_102354-102535	A01	A:A	5.64426	0.44916	rs35801418	102354			C01
4809900	PD_Controls 3_KZ_102354-102535	B01	A:A	5.41337	0.52079	rs35801418	102491			G01
4809900	PD_Controls 3_KZ_102354-102535	C01	A:A	5.20643	0.41298	rs35801418	102340			K01
4809900	PD_Controls 3_KZ_102354-102535	D01	A:A	5.55545	0.77532	rs35801418	102357			O01
4809900	PD_Controls 3_KZ_102354-102535	E01	?	4.94476	0.94624	rs35801418	102412			S01
4809900	PD_Controls 3_KZ_102354-102535	F01	A:A	6.35719	0.76196	rs35801418	102419			W01
4809900	PD_Controls 3_KZ_102354-102535	G01	A:A	5.26836	0.46973	rs35801418	102432			AA01
4809900	PD_Controls 3_KZ_102354-102535	H01	A:A	5.00910	0.70039	rs35801418	102477			AE01
4809900	PD_Controls 3_KZ_102354-102535	A02	A:A	5.92862	0.34275	rs35801418	102436			C05
4809900	PD_Controls 3_KZ_102354-102535	B02	?	4.39991	0.82898	rs35801418	102437			G05
4809900	PD_Controls 3_KZ_102354-102535	C02	A:A	5.55695	0.61261	rs35801418	102534			K05
4809900	PD_Controls 3_KZ_102354-102535	D02	A:A	6.28290	0.60029	rs35801418	102535			O05
4809900	PD_Controls 3_KZ_102354-102535	G12	NTC	0.24789	0.39005	rs35801418				AA45
4809900	PD_Controls 3_KZ_102354-102535	H12	NTC	0.14645	0.56302	rs35801418				AE45
4809901	Plate 1 PD_98647-98740	A01	T:T	4.26619	0.74854	rs35870237	98647			C03
4809901	Plate 1 PD_98647-98740	B01	?	1.34744	0.82441	rs35870237	98648			G03
4809901	Plate 1 PD_98647-98740	C01	?	0.98282	0.54827	rs35870237	98649			K03
4809901	Plate 1 PD_98647-98740	D01	T:T	4.25415	0.59023	rs35870237	98650			O03
4809901	Plate 1 PD_98647-98740	E01	T:T	4.38890	0.54367	rs35870237	98651			S03
4809901	Plate 1 PD_98647-98740	F01	T:T	4.01713	0.63430	rs35870237	98652			W03
4809901	Plate 1 PD_98647-98740	G01	T:T	5.05582	0.76915	rs35870237	98653			AA03
4809901	Plate 1 PD_98647-98740	H01	T:T	5.10391	0.67299	rs35870237	98654			AE03
4809901	Plate 1 PD_98647-98740	A02	?	2.85738	0.76882	rs35870237	98655			C07
4809901	Plate 1 PD_98647-98740	B02	T:T	5.30040	0.64199	rs35870237	98656			G07
4809901	Plate 1 PD_98647-98740	C02	T:T	5.82455	0.70944	rs35870237	98657			K07
4809901	Plate 1 PD_98647-98740	D02	T:T	5.30490	0.60689	rs35870237	98658			O07
4809901	Plate 1 PD_98647-98740	E02	T:T	5.14755	0.65948	rs35870237	98659			S07
4809901	Plate 1 PD_98647-98740	F02	T:T	4.65894	0.60294	rs35870237	98660			W07
4809901	Plate 1 PD_98647-98740	G02	T:T	4.59750	0.59534	rs35870237	98661			AA07
4809901	Plate 1 PD_98647-98740	H02	T:T	5.38119	0.61108	rs35870237	98662			AE07
4809901	Plate 1 PD_98647-98740	A03	T:T	5.31817	0.90995	rs35870237	98663			C11
4809901	Plate 1 PD_98647-98740	B03	T:T	5.53172	1.00302	rs35870237	98664			G11
4809901	Plate 1 PD_98647-98740	C03	T:T	5.56302	0.76406	rs35870237	98665			K11
4809901	Plate 1 PD_98647-98740	D03	T:T	5.24846	0.88939	rs35870237	98666			O11
4809901	Plate 1 PD_98647-98740	E03	T:T	4.87452	0.71676	rs35870237	98667			S11
4809901	Plate 1 PD_98647-98740	F03	T:T	5.12009	0.76916	rs35870237	98668			W11
4809901	Plate 1 PD_98647-98740	G03	T:T	4.62698	0.62843	rs35870237	98669			AA11
4809901	Plate 1 PD_98647-98740	H03	T:T	5.09368	0.67572	rs35870237	98670			AE11
4809901	Plate 1 PD_98647-98740	A04	T:T	5.57260	0.75268	rs35870237	98671			C15
4809901	Plate 1 PD_98647-98740	B04	T:T	5.92454	0.91668	rs35870237	98672			G15
4809901	Plate 1 PD_98647-98740	C04	?	4.43532	1.34892	rs35870237	98673			K15
4809901	Plate 1 PD_98647-98740	D04	T:T	5.53660	0.79631	rs35870237	98674			O15
4809901	Plate 1 PD_98647-98740	E04	?	2.36732	1.17254	rs35870237	98675			S15
4809901	Plate 1 PD_98647-98740	F04	?	0.34358	0.90452	rs35870237	98676			W15
4809901	Plate 1 PD_98647-98740	G04	?	1.95777	0.84628	rs35870237	98677			AA15
4809901	Plate 1 PD_98647-98740	H04	?	0.29320	0.91335	rs35870237	98678			AE15
4809901	Plate 1 PD_98647-98740	A05	T:T	5.46912	0.87352	rs35870237	98679			C19
4809901	Plate 1 PD_98647-98740	B05	T:T	5.14634	0.81893	rs35870237	98680			G19
4809901	Plate 1 PD_98647-98740	C05	T:T	5.04781	0.76308	rs35870237	98681			K19
4809901	Plate 1 PD_98647-98740	D05	T:T	5.39474	0.82298	rs35870237	98682			O19
4809901	Plate 1 PD_98647-98740	E05	T:T	4.97152	0.94675	rs35870237	98683			S19
4809901	Plate 1 PD_98647-98740	F05	T:T	5.67043	1.04148	rs35870237	98684			W19
4809901	Plate 1 PD_98647-98740	G05	T:T	5.25686	0.82112	rs35870237	98685			AA19
4809901	Plate 1 PD_98647-98740	H05	T:T	4.95629	0.88661	rs35870237	98686			AE19
4809901	Plate 1 PD_98647-98740	A06	T:T	5.33789	1.08277	rs35870237	98687			C23
4809901	Plate 1 PD_98647-98740	B06	T:T	5.45232	0.86680	rs35870237	98688			G23
4809901	Plate 1 PD_98647-98740	C06	T:T	5.02919	0.79845	rs35870237	98689			K23
4809901	Plate 1 PD_98647-98740	D06	?	5.55778	1.72911	rs35870237	98690			O23
4809901	Plate 1 PD_98647-98740	E06	T:T	4.79946	0.71953	rs35870237	98691			S23
4809901	Plate 1 PD_98647-98740	F06	T:T	4.82631	0.84060	rs35870237	98692			W23
4809901	Plate 1 PD_98647-98740	G06	T:T	5.08200	0.77968	rs35870237	98693			AA23
4809901	Plate 1 PD_98647-98740	H06	T:T	4.77493	0.94277	rs35870237	98694			AE23
4809901	Plate 1 PD_98647-98740	A07	T:T	5.50905	1.02282	rs35870237	98695			C27
4809901	Plate 1 PD_98647-98740	B07	T:T	5.34369	0.90220	rs35870237	98696			G27
4809901	Plate 1 PD_98647-98740	C07	T:T	5.11147	0.81697	rs35870237	98697			K27
4809901	Plate 1 PD_98647-98740	D07	T:T	5.18143	0.85792	rs35870237	98698			O27
4809901	Plate 1 PD_98647-98740	E07	T:T	5.02340	0.71066	rs35870237	98699			S27
4809901	Plate 1 PD_98647-98740	F07	T:T	5.17664	0.93325	rs35870237	98700			W27
4809901	Plate 1 PD_98647-98740	G07	T:T	4.78920	0.97504	rs35870237	98701			AA27
4809901	Plate 1 PD_98647-98740	H07	T:T	4.01057	0.58782	rs35870237	98702			AE27
4809901	Plate 1 PD_98647-98740	A08	T:T	4.98634	0.85724	rs35870237	98703			C31
4809901	Plate 1 PD_98647-98740	B08	T:T	5.38610	0.77385	rs35870237	98704			G31
4809901	Plate 1 PD_98647-98740	C08	T:T	5.46110	0.86524	rs35870237	98705			K31
4809901	Plate 1 PD_98647-98740	D08	T:T	5.00492	0.84731	rs35870237	98706			O31
4809901	Plate 1 PD_98647-98740	E08	T:T	4.72959	0.64959	rs35870237	98707			S31
4809901	Plate 1 PD_98647-98740	F08	T:T	5.74559	1.04755	rs35870237	98708			W31
4809901	Plate 1 PD_98647-98740	G08	T:T	5.12013	0.90547	rs35870237	98709			AA31
4809901	Plate 1 PD_98647-98740	H08	T:T	5.20963	0.74648	rs35870237	98710			AE31
4809901	Plate 1 PD_98647-98740	A09	T:T	6.04520	0.78104	rs35870237	98711			C35
4809901	Plate 1 PD_98647-98740	B09	T:T	5.30992	0.70990	rs35870237	98712			G35
4809901	Plate 1 PD_98647-98740	C09	T:T	5.37502	0.74186	rs35870237	98713			K35
4809901	Plate 1 PD_98647-98740	D09	T:T	5.31723	0.75975	rs35870237	98714			O35
4809901	Plate 1 PD_98647-98740	E09	T:T	4.96596	0.72604	rs35870237	98715			S35
4809901	Plate 1 PD_98647-98740	F09	T:T	5.37879	0.78196	rs35870237	98716			W35
4809901	Plate 1 PD_98647-98740	G09	T:T	4.88387	0.76972	rs35870237	98717			AA35
4809901	Plate 1 PD_98647-98740	H09	T:T	5.01355	0.80589	rs35870237	98718			AE35
4809901	Plate 1 PD_98647-98740	A10	T:T	5.68023	0.83847	rs35870237	98719			C39
4809901	Plate 1 PD_98647-98740	B10	T:T	6.33637	1.04814	rs35870237	98720			G39
4809901	Plate 1 PD_98647-98740	C10	T:T	5.03284	0.80705	rs35870237	98721			K39
4809901	Plate 1 PD_98647-98740	D10	T:T	5.47797	0.67153	rs35870237	98722			O39
4809901	Plate 1 PD_98647-98740	E10	T:T	5.15638	0.78975	rs35870237	98723			S39
4809901	Plate 1 PD_98647-98740	F10	T:T	4.95625	0.82858	rs35870237	98724			W39
4809901	Plate 1 PD_98647-98740	G10	T:T	5.73297	0.88068	rs35870237	98725			AA39
4809901	Plate 1 PD_98647-98740	H10	T:T	5.37133	0.79595	rs35870237	98726			AE39
4809901	Plate 1 PD_98647-98740	A11	T:T	5.25515	1.05025	rs35870237	98727			C43
4809901	Plate 1 PD_98647-98740	B11	T:T	5.44157	0.95667	rs35870237	98728			G43
4809901	Plate 1 PD_98647-98740	C11	T:T	5.58014	0.94690	rs35870237	98729			K43
4809901	Plate 1 PD_98647-98740	D11	T:T	5.83267	0.90305	rs35870237	98730			O43
4809901	Plate 1 PD_98647-98740	E11	T:T	5.34816	0.73729	rs35870237	98731			S43
4809901	Plate 1 PD_98647-98740	F11	T:T	5.60428	0.83861	rs35870237	98732			W43
4809901	Plate 1 PD_98647-98740	G11	T:T	5.05750	0.78299	rs35870237	98733			AA43
4809901	Plate 1 PD_98647-98740	H11	T:T	4.79413	0.90161	rs35870237	98734			AE43
4809901	Plate 1 PD_98647-98740	A12	T:T	5.10210	1.00284	rs35870237	98735			C47
4809901	Plate 1 PD_98647-98740	B12	T:T	5.27091	0.79496	rs35870237	98736			G47
4809901	Plate 1 PD_98647-98740	C12	T:T	5.57079	0.86223	rs35870237	98737			K47
4809901	Plate 1 PD_98647-98740	D12	T:T	5.62893	0.76193	rs35870237	98738			O47
4809901	Plate 1 PD_98647-98740	E12	T:T	5.47307	0.92147	rs35870237	98739			S47
4809901	Plate 1 PD_98647-98740	F12	T:T	5.44277	1.12604	rs35870237	98740			W47
4809901	Plate 1 PD_98647-98740	G12	NTC	0.25966	0.42574	rs35870237				AA47
4809901	Plate 1 PD_98647-98740	H12	NTC	0.15867	0.37449	rs35870237				AE47
4809901	Plate 2 PD_102271-98764	A01	T:T	5.13183	0.95839	rs35870237	102171			A02
4809901	Plate 2 PD_102271-98764	B01	T:T	5.03921	0.67760	rs35870237	102172			E02
4809901	Plate 2 PD_102271-98764	C01	T:T	5.07830	0.64777	rs35870237	102173			I02
4809901	Plate 2 PD_102271-98764	D01	T:T	4.55008	0.55330	rs35870237	102174			M02
4809901	Plate 2 PD_102271-98764	E01	T:T	4.68786	0.76760	rs35870237	102175			Q02
4809901	Plate 2 PD_102271-98764	F01	T:T	5.50196	0.67247	rs35870237	102176			U02
4809901	Plate 2 PD_102271-98764	G01	T:T	4.81292	0.85812	rs35870237	102177			Y02
4809901	Plate 2 PD_102271-98764	H01	T:T	4.95159	0.71436	rs35870237	102178			AC02
4809901	Plate 2 PD_102271-98764	A02	T:T	5.15972	0.80259	rs35870237	102179			A06
4809901	Plate 2 PD_102271-98764	B02	T:T	5.67246	1.03545	rs35870237	102180			E06
4809901	Plate 2 PD_102271-98764	C02	T:T	5.20365	0.71888	rs35870237	102181			I06
4809901	Plate 2 PD_102271-98764	D02	T:T	5.32321	0.76841	rs35870237	102182			M06
4809901	Plate 2 PD_102271-98764	E02	T:T	5.21456	0.70687	rs35870237	102183			Q06
4809901	Plate 2 PD_102271-98764	F02	T:T	5.02464	0.81386	rs35870237	102184			U06
4809901	Plate 2 PD_102271-98764	G02	T:T	5.13577	0.89379	rs35870237	102185			Y06
4809901	Plate 2 PD_102271-98764	H02	T:T	5.39622	0.86286	rs35870237	102186			AC06
4809901	Plate 2 PD_102271-98764	A03	?	5.96947	1.54704	rs35870237	102187			A10
4809901	Plate 2 PD_102271-98764	B03	T:T	5.02210	0.87990	rs35870237	102189			E10
4809901	Plate 2 PD_102271-98764	C03	T:T	5.50908	0.83355	rs35870237	102190			I10
4809901	Plate 2 PD_102271-98764	D03	T:T	5.42190	0.70166	rs35870237	102191			M10
4809901	Plate 2 PD_102271-98764	E03	T:T	5.42110	0.89637	rs35870237	102192			Q10
4809901	Plate 2 PD_102271-98764	F03	T:T	5.44277	0.77949	rs35870237	102193			U10
4809901	Plate 2 PD_102271-98764	G03	T:T	5.94869	0.67286	rs35870237	102194			Y10
4809901	Plate 2 PD_102271-98764	H03	T:T	5.85907	1.04543	rs35870237	102195			AC10
4809901	Plate 2 PD_102271-98764	A04	T:T	5.30825	0.99199	rs35870237	102196			A14
4809901	Plate 2 PD_102271-98764	B04	T:T	4.39386	0.85023	rs35870237	102197			E14
4809901	Plate 2 PD_102271-98764	C04	T:T	4.81534	0.86503	rs35870237	102198			I14
4809901	Plate 2 PD_102271-98764	D04	T:T	5.33613	0.75978	rs35870237	102199			M14
4809901	Plate 2 PD_102271-98764	E04	T:T	5.43836	0.79099	rs35870237	102200			Q14
4809901	Plate 2 PD_102271-98764	F04	T:T	5.44967	0.96048	rs35870237	102201			U14
4809901	Plate 2 PD_102271-98764	G04	T:T	4.81845	0.79997	rs35870237	102202			Y14
4809901	Plate 2 PD_102271-98764	H04	T:T	4.97964	1.07304	rs35870237	102203			AC14
4809901	Plate 2 PD_102271-98764	A05	T:T	5.61612	1.03040	rs35870237	102204			A18
4809901	Plate 2 PD_102271-98764	B05	T:T	5.19059	1.02120	rs35870237	102205			E18
4809901	Plate 2 PD_102271-98764	C05	T:T	5.36723	0.92864	rs35870237	102206			I18
4809901	Plate 2 PD_102271-98764	D05	T:T	5.54961	0.86409	rs35870237	102207			M18
4809901	Plate 2 PD_102271-98764	E05	T:T	5.54544	0.77672	rs35870237	102208			Q18
4809901	Plate 2 PD_102271-98764	F05	T:T	5.35724	0.91844	rs35870237	102209			U18
4809901	Plate 2 PD_102271-98764	G05	T:T	5.70273	0.85852	rs35870237	102210			Y18
4809901	Plate 2 PD_102271-98764	H05	T:T	5.49398	0.51647	rs35870237	102211			AC18
4809901	Plate 2 PD_102271-98764	A06	T:T	5.98817	0.91746	rs35870237	102212			A22
4809901	Plate 2 PD_102271-98764	B06	T:T	5.61354	1.04556	rs35870237	102213			E22
4809901	Plate 2 PD_102271-98764	C06	T:T	5.71798	1.00262	rs35870237	102214			I22
4809901	Plate 2 PD_102271-98764	D06	T:T	5.55048	0.95844	rs35870237	102215			M22
4809901	Plate 2 PD_102271-98764	E06	T:T	4.60039	0.85317	rs35870237	102216			Q22
4809901	Plate 2 PD_102271-98764	F06	T:T	5.15335	1.07508	rs35870237	102217			U22
4809901	Plate 2 PD_102271-98764	G06	T:T	4.96372	0.87904	rs35870237	102218			Y22
4809901	Plate 2 PD_102271-98764	H06	T:T	4.71858	0.85386	rs35870237	102219			AC22
4809901	Plate 2 PD_102271-98764	A07	T:T	5.55691	1.12217	rs35870237	102221			A26
4809901	Plate 2 PD_102271-98764	B07	T:T	5.86346	1.11370	rs35870237	102222			E26
4809901	Plate 2 PD_102271-98764	C07	T:T	5.27560	1.05203	rs35870237	102223			I26
4809901	Plate 2 PD_102271-98764	D07	T:T	5.60375	1.18570	rs35870237	102224			M26
4809901	Plate 2 PD_102271-98764	E07	T:T	5.65656	0.91535	rs35870237	102225			Q26
4809901	Plate 2 PD_102271-98764	F07	T:T	5.02810	0.80334	rs35870237	102226			U26
4809901	Plate 2 PD_102271-98764	G07	T:T	5.03242	0.98174	rs35870237	102227			Y26
4809901	Plate 2 PD_102271-98764	H07	T:T	5.73290	0.88429	rs35870237	102228			AC26
4809901	Plate 2 PD_102271-98764	A08	T:T	5.35901	1.11115	rs35870237	102229			A30
4809901	Plate 2 PD_102271-98764	B08	T:T	5.57432	1.02242	rs35870237	102230			E30
4809901	Plate 2 PD_102271-98764	C08	T:T	6.03560	0.80286	rs35870237	102231			I30
4809901	Plate 2 PD_102271-98764	D08	T:T	5.00889	0.81876	rs35870237	102232			M30
4809901	Plate 2 PD_102271-98764	E08	T:T	4.88639	0.73947	rs35870237	102233			Q30
4809901	Plate 2 PD_102271-98764	F08	T:T	5.36509	0.78907	rs35870237	102234			U30
4809901	Plate 2 PD_102271-98764	G08	T:T	5.10877	0.90556	rs35870237	102235			Y30
4809901	Plate 2 PD_102271-98764	H08	T:T	4.84632	0.77646	rs35870237	102236			AC30
4809901	Plate 2 PD_102271-98764	A09	T:T	5.27013	0.93217	rs35870237	102237			A34
4809901	Plate 2 PD_102271-98764	B09	T:T	5.74003	0.85452	rs35870237	102238			E34
4809901	Plate 2 PD_102271-98764	C09	T:T	5.78957	1.03726	rs35870237	102239			I34
4809901	Plate 2 PD_102271-98764	D09	T:T	5.07136	0.78216	rs35870237	102241			M34
4809901	Plate 2 PD_102271-98764	E09	T:T	6.17245	0.76119	rs35870237	102242			Q34
4809901	Plate 2 PD_102271-98764	F09	T:T	4.97260	0.67085	rs35870237	102243			U34
4809901	Plate 2 PD_102271-98764	G09	T:T	5.10136	0.97397	rs35870237	102244			Y34
4809901	Plate 2 PD_102271-98764	H09	T:T	5.19855	0.91185	rs35870237	102245			AC34
4809901	Plate 2 PD_102271-98764	A10	T:T	5.68797	0.97881	rs35870237	102246			A38
4809901	Plate 2 PD_102271-98764	B10	T:T	5.44436	0.61915	rs35870237	102247			E38
4809901	Plate 2 PD_102271-98764	C10	T:T	5.12047	0.98520	rs35870237	102248			I38
4809901	Plate 2 PD_102271-98764	D10	T:T	5.33433	0.76483	rs35870237	102249			M38
4809901	Plate 2 PD_102271-98764	E10	T:T	5.12766	0.79597	rs35870237	102250			Q38
4809901	Plate 2 PD_102271-98764	F10	T:T	5.01403	0.75928	rs35870237	102251			U38
4809901	Plate 2 PD_102271-98764	G10	T:T	5.47677	0.93638	rs35870237	102252			Y38
4809901	Plate 2 PD_102271-98764	H10	T:T	5.51949	0.98840	rs35870237	102253			AC38
4809901	Plate 2 PD_102271-98764	A11	T:T	5.59617	1.33356	rs35870237	102254			A42
4809901	Plate 2 PD_102271-98764	B11	T:T	5.64671	1.02142	rs35870237	102256			E42
4809901	Plate 2 PD_102271-98764	C11	T:T	5.70277	0.78384	rs35870237	102258			I42
4809901	Plate 2 PD_102271-98764	D11	T:T	5.20507	0.61498	rs35870237	102259			M42
4809901	Plate 2 PD_102271-98764	E11	T:T	5.89474	1.04469	rs35870237	102260			Q42
4809901	Plate 2 PD_102271-98764	F11	T:T	4.97593	0.77246	rs35870237	102263			U42
4809901	Plate 2 PD_102271-98764	G11	T:T	5.29823	0.96915	rs35870237	102265			Y42
4809901	Plate 2 PD_102271-98764	H11	T:T	4.67948	0.69946	rs35870237	102267			AC42
4809901	Plate 2 PD_102271-98764	A12	T:T	5.15428	0.88702	rs35870237	102269			A46
4809901	Plate 2 PD_102271-98764	B12	T:T	5.43867	0.97301	rs35870237	102270			E46
4809901	Plate 2 PD_102271-98764	C12	T:T	6.29052	0.97990	rs35870237	102240			I46
4809901	Plate 2 PD_102271-98764	D12	T:T	5.45690	0.82236	rs35870237	98762			M46
4809901	Plate 2 PD_102271-98764	E12	T:T	5.72933	1.02408	rs35870237	98763			Q46
4809901	Plate 2 PD_102271-98764	F12	T:T	5.65914	1.06791	rs35870237	98764			U46
4809901	Plate 2 PD_102271-98764	G12	NTC	0.15133	0.73584	rs35870237				Y46
4809901	Plate 2 PD_102271-98764	H12	NTC	0.17400	0.68003	rs35870237				AC46
4809901	Plate 3 PD_102271-98766	A01	T:T	5.50941	1.11080	rs35870237	102271			A04
4809901	Plate 3 PD_102271-98766	B01	T:T	5.30529	0.79084	rs35870237	102272			E04
4809901	Plate 3 PD_102271-98766	C01	T:T	5.48145	0.91282	rs35870237	102273			I04
4809901	Plate 3 PD_102271-98766	D01	T:T	4.40557	0.72082	rs35870237	102275			M04
4809901	Plate 3 PD_102271-98766	E01	T:T	5.25385	0.78548	rs35870237	102276			Q04
4809901	Plate 3 PD_102271-98766	F01	T:T	5.40080	0.77132	rs35870237	102277			U04
4809901	Plate 3 PD_102271-98766	G01	T:T	5.56027	0.81746	rs35870237	102280			Y04
4809901	Plate 3 PD_102271-98766	H01	T:T	5.23114	0.61763	rs35870237	102281			AC04
4809901	Plate 3 PD_102271-98766	A02	T:T	5.80966	0.93767	rs35870237	102282			A08
4809901	Plate 3 PD_102271-98766	B02	?	2.72086	0.74335	rs35870237	102284			E08
4809901	Plate 3 PD_102271-98766	C02	T:T	5.52969	0.89935	rs35870237	102285			I08
4809901	Plate 3 PD_102271-98766	D02	T:T	4.91398	0.70362	rs35870237	102286			M08
4809901	Plate 3 PD_102271-98766	E02	T:T	5.42354	0.65919	rs35870237	102287			Q08
4809901	Plate 3 PD_102271-98766	F02	T:T	5.14788	0.69173	rs35870237	102288			U08
4809901	Plate 3 PD_102271-98766	G02	T:T	5.44335	0.77164	rs35870237	102289			Y08
4809901	Plate 3 PD_102271-98766	H02	T:T	4.95008	0.69300	rs35870237	102291			AC08
4809901	Plate 3 PD_102271-98766	A03	T:T	5.19662	0.98887	rs35870237	102292			A12
4809901	Plate 3 PD_102271-98766	B03	T:T	4.95582	0.87976	rs35870237	102293			E12
4809901	Plate 3 PD_102271-98766	C03	T:T	5.27078	1.12771	rs35870237	102294			I12
4809901	Plate 3 PD_102271-98766	D03	T:T	5.59908	0.95833	rs35870237	102295			M12
4809901	Plate 3 PD_102271-98766	E03	T:T	5.55310	1.00706	rs35870237	102296			Q12
4809901	Plate 3 PD_102271-98766	F03	?	0.33366	0.74965	rs35870237	102297			U12
4809901	Plate 3 PD_102271-98766	G03	T:T	4.84840	0.78976	rs35870237	102298			Y12
4809901	Plate 3 PD_102271-98766	H03	T:T	5.40648	0.99685	rs35870237	102300			AC12
4809901	Plate 3 PD_102271-98766	A04	T:T	5.06110	0.80433	rs35870237	102301			A16
4809901	Plate 3 PD_102271-98766	B04	T:T	5.73414	0.70256	rs35870237	102302			E16
4809901	Plate 3 PD_102271-98766	C04	T:T	5.11037	0.73999	rs35870237	102304			I16
4809901	Plate 3 PD_102271-98766	D04	T:T	5.16244	0.84246	rs35870237	102306			M16
4809901	Plate 3 PD_102271-98766	E04	T:T	5.08518	0.71210	rs35870237	102308			Q16
4809901	Plate 3 PD_102271-98766	F04	T:T	5.09268	0.73013	rs35870237	102310			U16
4809901	Plate 3 PD_102271-98766	G04	T:T	4.33468	0.61410	rs35870237	102311			Y16
4809901	Plate 3 PD_102271-98766	H04	T:T	4.81696	0.79543	rs35870237	102312			AC16
4809901	Plate 3 PD_102271-98766	A05	T:T	5.51698	0.98520	rs35870237	102313			A20
4809901	Plate 3 PD_102271-98766	B05	T:T	5.42426	1.17174	rs35870237	102315			E20
4809901	Plate 3 PD_102271-98766	C05	T:T	5.63053	0.80774	rs35870237	102316			I20
4809901	Plate 3 PD_102271-98766	D05	T:T	6.43115	1.24964	rs35870237	102317			M20
4809901	Plate 3 PD_102271-98766	E05	T:T	5.21444	0.88115	rs35870237	102318			Q20
4809901	Plate 3 PD_102271-98766	F05	T:T	5.01126	0.71499	rs35870237	102319			U20
4809901	Plate 3 PD_102271-98766	G05	T:T	5.42826	0.97711	rs35870237	102320			Y20
4809901	Plate 3 PD_102271-98766	H05	T:T	5.11828	0.87324	rs35870237	102321			AC20
4809901	Plate 3 PD_102271-98766	A06	T:T	5.57624	1.04578	rs35870237	102322			A24
4809901	Plate 3 PD_102271-98766	B06	T:T	5.22035	0.95234	rs35870237	102188			E24
4809901	Plate 3 PD_102271-98766	C06	?	0.94186	0.75986	rs35870237	102324			I24
4809901	Plate 3 PD_102271-98766	D06	T:T	5.36762	0.95875	rs35870237	102325			M24
4809901	Plate 3 PD_102271-98766	E06	T:T	5.81961	0.99089	rs35870237	102326			Q24
4809901	Plate 3 PD_102271-98766	F06	T:T	4.68825	0.87173	rs35870237	102327			U24
4809901	Plate 3 PD_102271-98766	G06	T:T	5.62145	1.10046	rs35870237	102328			Y24
4809901	Plate 3 PD_102271-98766	H06	T:T	5.02765	0.81611	rs35870237	102329			AC24
4809901	Plate 3 PD_102271-98766	A07	T:T	5.47134	0.97356	rs35870237	102330			A28
4809901	Plate 3 PD_102271-98766	B07	T:T	5.31242	0.97244	rs35870237	102331			E28
4809901	Plate 3 PD_102271-98766	C07	T:T	4.85460	0.66825	rs35870237	102332			I28
4809901	Plate 3 PD_102271-98766	D07	T:T	4.81852	0.81993	rs35870237	102333			M28
4809901	Plate 3 PD_102271-98766	E07	T:T	5.34778	0.64251	rs35870237	102334			Q28
4809901	Plate 3 PD_102271-98766	F07	T:T	4.22145	0.86446	rs35870237	102335			U28
4809901	Plate 3 PD_102271-98766	G07	T:T	5.44433	1.06984	rs35870237	98760			Y28
4809901	Plate 3 PD_102271-98766	H07	T:T	5.01350	1.00021	rs35870237	98761			AC28
4809901	Plate 3 PD_102271-98766	A08	T:T	5.78569	1.20193	rs35870237	98765			A32
4809901	Plate 3 PD_102271-98766	B08	T:T	5.33622	0.95368	rs35870237	98766			E32
4809901	Plate 3 PD_102271-98766	G12	NTC	0.30402	0.45912	rs35870237				Y48
4809901	Plate 3 PD_102271-98766	H12	NTC	0.27622	0.79727	rs35870237				AC48
4809901	PD_Controls 1_KZ_102336-102435	A01	T:T	5.61137	0.93971	rs35870237	102336			A01
4809901	PD_Controls 1_KZ_102336-102435	B01	?	4.51661	1.45085	rs35870237	102345			E01
4809901	PD_Controls 1_KZ_102336-102435	C01	T:T	5.20881	0.83139	rs35870237	102337			I01
4809901	PD_Controls 1_KZ_102336-102435	D01	T:T	4.99668	0.75926	rs35870237	102339			M01
4809901	PD_Controls 1_KZ_102336-102435	E01	T:T	4.77080	0.83715	rs35870237	102341			Q01
4809901	PD_Controls 1_KZ_102336-102435	F01	T:T	4.96812	1.26282	rs35870237	102342			U01
4809901	PD_Controls 1_KZ_102336-102435	G01	T:T	4.90877	0.81717	rs35870237	102343			Y01
4809901	PD_Controls 1_KZ_102336-102435	H01	T:T	5.54585	0.80720	rs35870237	102344			AC01
4809901	PD_Controls 1_KZ_102336-102435	A02	T:T	5.22749	0.79514	rs35870237	102338			A05
4809901	PD_Controls 1_KZ_102336-102435	B02	T:T	5.10795	0.99811	rs35870237	102346			E05
4809901	PD_Controls 1_KZ_102336-102435	C02	T:T	5.63514	0.77110	rs35870237	102347			I05
4809901	PD_Controls 1_KZ_102336-102435	D02	T:T	5.40994	0.72385	rs35870237	102348			M05
4809901	PD_Controls 1_KZ_102336-102435	E02	T:T	5.03379	0.92072	rs35870237	102349			Q05
4809901	PD_Controls 1_KZ_102336-102435	F02	T:T	4.99752	0.86075	rs35870237	102350			U05
4809901	PD_Controls 1_KZ_102336-102435	G02	T:T	4.74095	0.81508	rs35870237	102351			Y05
4809901	PD_Controls 1_KZ_102336-102435	H02	T:T	5.15051	1.11651	rs35870237	102352			AC05
4809901	PD_Controls 1_KZ_102336-102435	A03	T:T	5.74772	1.25388	rs35870237	102353			A09
4809901	PD_Controls 1_KZ_102336-102435	B03	T:T	6.04975	0.89316	rs35870237	102355			E09
4809901	PD_Controls 1_KZ_102336-102435	C03	T:T	5.62448	0.83444	rs35870237	102356			I09
4809901	PD_Controls 1_KZ_102336-102435	D03	T:T	5.17713	0.86675	rs35870237	102358			M09
4809901	PD_Controls 1_KZ_102336-102435	E03	T:T	5.60811	0.87307	rs35870237	102359			Q09
4809901	PD_Controls 1_KZ_102336-102435	F03	T:T	5.75679	1.04306	rs35870237	102360			U09
4809901	PD_Controls 1_KZ_102336-102435	G03	T:T	5.45619	0.95592	rs35870237	102361			Y09
4809901	PD_Controls 1_KZ_102336-102435	H03	T:T	5.41072	0.91653	rs35870237	102362			AC09
4809901	PD_Controls 1_KZ_102336-102435	A04	T:T	5.37139	1.01034	rs35870237	102363			A13
4809901	PD_Controls 1_KZ_102336-102435	B04	T:T	5.32011	0.86321	rs35870237	102364			E13
4809901	PD_Controls 1_KZ_102336-102435	C04	T:T	5.48878	0.71737	rs35870237	102365			I13
4809901	PD_Controls 1_KZ_102336-102435	D04	T:T	5.52798	0.77418	rs35870237	102366			M13
4809901	PD_Controls 1_KZ_102336-102435	E04	T:T	5.23392	1.01869	rs35870237	102367			Q13
4809901	PD_Controls 1_KZ_102336-102435	F04	T:T	5.24911	0.84550	rs35870237	102368			U13
4809901	PD_Controls 1_KZ_102336-102435	G04	T:T	5.59133	0.77214	rs35870237	102369			Y13
4809901	PD_Controls 1_KZ_102336-102435	H04	T:T	5.48819	0.82022	rs35870237	102370			AC13
4809901	PD_Controls 1_KZ_102336-102435	A05	T:T	5.98781	1.20399	rs35870237	102371			A17
4809901	PD_Controls 1_KZ_102336-102435	B05	T:T	5.91090	0.98441	rs35870237	102372			E17
4809901	PD_Controls 1_KZ_102336-102435	C05	T:T	5.46285	1.07551	rs35870237	102373			I17
4809901	PD_Controls 1_KZ_102336-102435	D05	T:T	5.21642	0.89381	rs35870237	102374			M17
4809901	PD_Controls 1_KZ_102336-102435	E05	T:T	5.47693	1.03943	rs35870237	102375			Q17
4809901	PD_Controls 1_KZ_102336-102435	F05	T:T	6.16044	1.15124	rs35870237	102376			U17
4809901	PD_Controls 1_KZ_102336-102435	G05	T:T	4.77030	0.83669	rs35870237	102377			Y17
4809901	PD_Controls 1_KZ_102336-102435	H05	T:T	5.47756	0.92426	rs35870237	102378			AC17
4809901	PD_Controls 1_KZ_102336-102435	A06	T:T	5.43190	1.08572	rs35870237	102379			A21
4809901	PD_Controls 1_KZ_102336-102435	B06	T:T	4.99992	0.92652	rs35870237	102380			E21
4809901	PD_Controls 1_KZ_102336-102435	C06	T:T	5.72223	0.96026	rs35870237	102381			I21
4809901	PD_Controls 1_KZ_102336-102435	D06	T:T	5.17981	0.88297	rs35870237	102382			M21
4809901	PD_Controls 1_KZ_102336-102435	E06	T:T	5.28505	0.70676	rs35870237	102383			Q21
4809901	PD_Controls 1_KZ_102336-102435	F06	T:T	5.25599	1.00502	rs35870237	102384			U21
4809901	PD_Controls 1_KZ_102336-102435	G06	T:T	4.73129	1.10344	rs35870237	102385			Y21
4809901	PD_Controls 1_KZ_102336-102435	H06	T:T	4.92597	1.04707	rs35870237	102386			AC21
4809901	PD_Controls 1_KZ_102336-102435	A07	T:T	5.31805	0.91077	rs35870237	102387			A25
4809901	PD_Controls 1_KZ_102336-102435	B07	T:T	5.04172	0.95763	rs35870237	102388			E25
4809901	PD_Controls 1_KZ_102336-102435	C07	T:T	5.19126	0.88786	rs35870237	102389			I25
4809901	PD_Controls 1_KZ_102336-102435	D07	T:T	5.01033	0.74745	rs35870237	102390			M25
4809901	PD_Controls 1_KZ_102336-102435	E07	T:T	5.03162	0.87576	rs35870237	102391			Q25
4809901	PD_Controls 1_KZ_102336-102435	F07	T:T	5.41854	0.94993	rs35870237	102392			U25
4809901	PD_Controls 1_KZ_102336-102435	G07	T:T	4.64408	1.04161	rs35870237	102393			Y25
4809901	PD_Controls 1_KZ_102336-102435	H07	T:T	4.22652	0.70973	rs35870237	102394			AC25
4809901	PD_Controls 1_KZ_102336-102435	A08	T:T	4.99166	1.00572	rs35870237	102395			A29
4809901	PD_Controls 1_KZ_102336-102435	B08	T:T	5.40883	0.77731	rs35870237	102396			E29
4809901	PD_Controls 1_KZ_102336-102435	C08	T:T	5.40204	0.85349	rs35870237	102397			I29
4809901	PD_Controls 1_KZ_102336-102435	D08	T:T	5.14809	0.82460	rs35870237	102398			M29
4809901	PD_Controls 1_KZ_102336-102435	E08	T:T	4.71598	0.75541	rs35870237	102399			Q29
4809901	PD_Controls 1_KZ_102336-102435	F08	T:T	5.28329	0.88343	rs35870237	102400			U29
4809901	PD_Controls 1_KZ_102336-102435	G08	T:T	4.87049	0.87342	rs35870237	102401			Y29
4809901	PD_Controls 1_KZ_102336-102435	H08	T:T	5.40222	0.95131	rs35870237	102402			AC29
4809901	PD_Controls 1_KZ_102336-102435	A09	T:T	5.52937	0.96025	rs35870237	102403			A33
4809901	PD_Controls 1_KZ_102336-102435	B09	T:T	6.01001	0.93439	rs35870237	102413			E33
4809901	PD_Controls 1_KZ_102336-102435	C09	T:T	5.01938	0.74587	rs35870237	102405			I33
4809901	PD_Controls 1_KZ_102336-102435	D09	T:T	5.13423	0.71279	rs35870237	102406			M33
4809901	PD_Controls 1_KZ_102336-102435	E09	?	4.84054	1.71145	rs35870237	102407			Q33
4809901	PD_Controls 1_KZ_102336-102435	F09	T:T	5.23463	0.77171	rs35870237	102408			U33
4809901	PD_Controls 1_KZ_102336-102435	G09	T:T	5.71311	0.94701	rs35870237	102409			Y33
4809901	PD_Controls 1_KZ_102336-102435	H09	T:T	4.16039	0.76886	rs35870237	102410			AC33
4809901	PD_Controls 1_KZ_102336-102435	A10	T:T	4.19685	0.81583	rs35870237	102411			A37
4809901	PD_Controls 1_KZ_102336-102435	B10	T:T	5.18746	0.86155	rs35870237	102404			E37
4809901	PD_Controls 1_KZ_102336-102435	C10	T:T	4.69272	0.82016	rs35870237	102414			I37
4809901	PD_Controls 1_KZ_102336-102435	D10	T:T	5.84142	0.94298	rs35870237	102415			M37
4809901	PD_Controls 1_KZ_102336-102435	E10	?	4.72719	1.59296	rs35870237	102416			Q37
4809901	PD_Controls 1_KZ_102336-102435	F10	T:T	5.45032	0.80521	rs35870237	102417			U37
4809901	PD_Controls 1_KZ_102336-102435	G10	T:T	5.07039	0.85775	rs35870237	102418			Y37
4809901	PD_Controls 1_KZ_102336-102435	H10	T:T	4.94674	0.88777	rs35870237	102420			AC37
4809901	PD_Controls 1_KZ_102336-102435	A11	T:T	5.58357	0.97372	rs35870237	102421			A41
4809901	PD_Controls 1_KZ_102336-102435	B11	T:T	5.04382	0.95910	rs35870237	102422			E41
4809901	PD_Controls 1_KZ_102336-102435	C11	T:T	4.98149	0.91101	rs35870237	102423			I41
4809901	PD_Controls 1_KZ_102336-102435	D11	T:T	5.53755	0.89955	rs35870237	102424			M41
4809901	PD_Controls 1_KZ_102336-102435	E11	T:T	5.11359	0.80903	rs35870237	102425			Q41
4809901	PD_Controls 1_KZ_102336-102435	F11	T:T	5.35956	0.73015	rs35870237	102426			U41
4809901	PD_Controls 1_KZ_102336-102435	G11	T:T	5.33695	1.05379	rs35870237	102427			Y41
4809901	PD_Controls 1_KZ_102336-102435	H11	T:T	4.93185	0.75534	rs35870237	102428			AC41
4809901	PD_Controls 1_KZ_102336-102435	A12	T:T	4.59968	0.56756	rs35870237	102429			A45
4809901	PD_Controls 1_KZ_102336-102435	B12	T:T	4.65468	0.98039	rs35870237	102430			E45
4809901	PD_Controls 1_KZ_102336-102435	C12	T:T	6.13504	0.74002	rs35870237	102431			I45
4809901	PD_Controls 1_KZ_102336-102435	D12	T:T	5.92452	0.71390	rs35870237	102433			M45
4809901	PD_Controls 1_KZ_102336-102435	E12	T:T	5.64550	0.90005	rs35870237	102434			Q45
4809901	PD_Controls 1_KZ_102336-102435	F12	T:T	4.90110	0.86411	rs35870237	102435			U45
4809901	PD_Controls 1_KZ_102336-102435	G12	NTC	0.36833	0.66323	rs35870237				Y45
4809901	PD_Controls 1_KZ_102336-102435	H12	NTC	0.29064	0.35022	rs35870237				AC45
4809901	PD_Controls 2_KZ_102438-102533	A01	T:T	5.45680	0.91817	rs35870237	102438			A03
4809901	PD_Controls 2_KZ_102438-102533	B01	T:T	5.78217	0.83677	rs35870237	102439			E03
4809901	PD_Controls 2_KZ_102438-102533	C01	T:T	5.39155	0.77476	rs35870237	102440			I03
4809901	PD_Controls 2_KZ_102438-102533	D01	T:T	5.06696	0.82593	rs35870237	102441			M03
4809901	PD_Controls 2_KZ_102438-102533	E01	T:T	5.12302	0.86940	rs35870237	102442			Q03
4809901	PD_Controls 2_KZ_102438-102533	F01	?	0.31127	0.71595	rs35870237	102443			U03
4809901	PD_Controls 2_KZ_102438-102533	G01	T:T	5.33142	0.72978	rs35870237	102444			Y03
4809901	PD_Controls 2_KZ_102438-102533	H01	T:T	4.99035	0.81694	rs35870237	102445			AC03
4809901	PD_Controls 2_KZ_102438-102533	A02	T:T	6.26454	0.94040	rs35870237	102446			A07
4809901	PD_Controls 2_KZ_102438-102533	B02	T:T	5.60695	0.86884	rs35870237	102447			E07
4809901	PD_Controls 2_KZ_102438-102533	C02	T:T	5.32991	0.71051	rs35870237	102448			I07
4809901	PD_Controls 2_KZ_102438-102533	D02	T:T	5.43583	0.92191	rs35870237	102449			M07
4809901	PD_Controls 2_KZ_102438-102533	E02	T:T	5.30701	0.86268	rs35870237	102450			Q07
4809901	PD_Controls 2_KZ_102438-102533	F02	T:T	4.90727	0.69803	rs35870237	102451			U07
4809901	PD_Controls 2_KZ_102438-102533	G02	T:T	4.93125	0.77835	rs35870237	102452			Y07
4809901	PD_Controls 2_KZ_102438-102533	H02	T:T	5.48014	1.01697	rs35870237	102453			AC07
4809901	PD_Controls 2_KZ_102438-102533	A03	T:T	4.92551	1.03550	rs35870237	102454			A11
4809901	PD_Controls 2_KZ_102438-102533	B03	T:T	4.92405	0.80896	rs35870237	102455			E11
4809901	PD_Controls 2_KZ_102438-102533	C03	T:T	5.81048	0.83847	rs35870237	102456			I11
4809901	PD_Controls 2_KZ_102438-102533	D03	T:T	5.24399	0.88476	rs35870237	102457			M11
4809901	PD_Controls 2_KZ_102438-102533	E03	T:T	5.74078	0.88972	rs35870237	102458			Q11
4809901	PD_Controls 2_KZ_102438-102533	F03	T:T	5.56373	1.03733	rs35870237	102459			U11
4809901	PD_Controls 2_KZ_102438-102533	G03	T:T	5.25607	0.78857	rs35870237	102460			Y11
4809901	PD_Controls 2_KZ_102438-102533	H03	?	5.11275	1.69151	rs35870237	102461			AC11
4809901	PD_Controls 2_KZ_102438-102533	A04	T:T	5.81957	1.09100	rs35870237	102462			A15
4809901	PD_Controls 2_KZ_102438-102533	B04	T:T	5.32817	0.82498	rs35870237	102463			E15
4809901	PD_Controls 2_KZ_102438-102533	C04	T:T	5.42117	0.91972	rs35870237	102464			I15
4809901	PD_Controls 2_KZ_102438-102533	D04	T:T	5.19241	0.85194	rs35870237	102465			M15
4809901	PD_Controls 2_KZ_102438-102533	E04	T:T	5.52399	0.98674	rs35870237	102466			Q15
4809901	PD_Controls 2_KZ_102438-102533	F04	T:T	4.85844	0.84607	rs35870237	102467			U15
4809901	PD_Controls 2_KZ_102438-102533	G04	T:T	5.13951	0.85315	rs35870237	102468			Y15
4809901	PD_Controls 2_KZ_102438-102533	H04	T:T	5.05273	0.66519	rs35870237	102469			AC15
4809901	PD_Controls 2_KZ_102438-102533	A05	T:T	4.81053	0.78020	rs35870237	102470			A19
4809901	PD_Controls 2_KZ_102438-102533	B05	T:T	5.47900	0.97110	rs35870237	102471			E19
4809901	PD_Controls 2_KZ_102438-102533	C05	T:T	5.17689	0.95245	rs35870237	102472			I19
4809901	PD_Controls 2_KZ_102438-102533	D05	T:T	5.55090	1.05104	rs35870237	102473			M19
4809901	PD_Controls 2_KZ_102438-102533	E05	T:T	5.44834	0.94099	rs35870237	102474			Q19
4809901	PD_Controls 2_KZ_102438-102533	F05	T:T	5.58969	0.88075	rs35870237	102475			U19
4809901	PD_Controls 2_KZ_102438-102533	G05	T:T	5.03203	0.79741	rs35870237	102476			Y19
4809901	PD_Controls 2_KZ_102438-102533	H05	T:T	5.36462	0.85073	rs35870237	102478			AC19
4809901	PD_Controls 2_KZ_102438-102533	A06	T:T	5.74948	1.33278	rs35870237	102479			A23
4809901	PD_Controls 2_KZ_102438-102533	B06	T:T	5.86928	1.10739	rs35870237	102480			E23
4809901	PD_Controls 2_KZ_102438-102533	C06	T:T	5.37288	0.85147	rs35870237	102481			I23
4809901	PD_Controls 2_KZ_102438-102533	D06	T:T	5.52233	0.97023	rs35870237	102482			M23
4809901	PD_Controls 2_KZ_102438-102533	E06	T:T	6.14921	1.04786	rs35870237	102483			Q23
4809901	PD_Controls 2_KZ_102438-102533	F06	T:T	4.80101	1.04176	rs35870237	102484			U23
4809901	PD_Controls 2_KZ_102438-102533	G06	T:T	5.27202	0.88932	rs35870237	102485			Y23
4809901	PD_Controls 2_KZ_102438-102533	H06	T:T	5.05935	0.98802	rs35870237	102486			AC23
4809901	PD_Controls 2_KZ_102438-102533	A07	T:T	5.17154	0.71743	rs35870237	102487			A27
4809901	PD_Controls 2_KZ_102438-102533	B07	T:T	4.95992	0.91339	rs35870237	102488			E27
4809901	PD_Controls 2_KZ_102438-102533	C07	T:T	5.04761	0.92617	rs35870237	102489			I27
4809901	PD_Controls 2_KZ_102438-102533	D07	T:T	5.57206	0.97674	rs35870237	102490			M27
4809901	PD_Controls 2_KZ_102438-102533	E07	T:T	5.78470	0.95165	rs35870237	102492			Q27
4809901	PD_Controls 2_KZ_102438-102533	F07	T:T	4.95740	0.96129	rs35870237	102493			U27
4809901	PD_Controls 2_KZ_102438-102533	G07	T:T	5.08208	0.86795	rs35870237	102494			Y27
4809901	PD_Controls 2_KZ_102438-102533	H07	T:T	4.64729	1.06257	rs35870237	102495			AC27
4809901	PD_Controls 2_KZ_102438-102533	A08	T:T	4.74948	0.78205	rs35870237	102496			A31
4809901	PD_Controls 2_KZ_102438-102533	B08	T:T	5.76632	1.00624	rs35870237	102497			E31
4809901	PD_Controls 2_KZ_102438-102533	C08	T:T	5.28109	0.77468	rs35870237	102498			I31
4809901	PD_Controls 2_KZ_102438-102533	D08	T:T	5.64779	0.93958	rs35870237	102499			M31
4809901	PD_Controls 2_KZ_102438-102533	E08	T:T	5.03442	0.84157	rs35870237	102500			Q31
4809901	PD_Controls 2_KZ_102438-102533	F08	T:T	5.27514	1.03463	rs35870237	102501			U31
4809901	PD_Controls 2_KZ_102438-102533	G08	T:T	4.84374	0.82296	rs35870237	102502			Y31
4809901	PD_Controls 2_KZ_102438-102533	H08	T:T	5.13428	0.98139	rs35870237	102503			AC31
4809901	PD_Controls 2_KZ_102438-102533	A09	T:T	5.24893	1.10527	rs35870237	102504			A35
4809901	PD_Controls 2_KZ_102438-102533	B09	T:T	4.67666	0.85893	rs35870237	102505			E35
4809901	PD_Controls 2_KZ_102438-102533	C09	T:T	5.35595	0.85057	rs35870237	102506			I35
4809901	PD_Controls 2_KZ_102438-102533	D09	T:T	5.24088	0.94306	rs35870237	102507			M35
4809901	PD_Controls 2_KZ_102438-102533	E09	T:T	5.00999	0.69019	rs35870237	102508			Q35
4809901	PD_Controls 2_KZ_102438-102533	F09	T:T	5.44392	0.72373	rs35870237	102509			U35
4809901	PD_Controls 2_KZ_102438-102533	G09	T:T	5.76965	0.91524	rs35870237	102510			Y35
4809901	PD_Controls 2_KZ_102438-102533	H09	T:T	4.86912	0.75941	rs35870237	102511			AC35
4809901	PD_Controls 2_KZ_102438-102533	A10	T:T	5.21465	0.95949	rs35870237	102512			A39
4809901	PD_Controls 2_KZ_102438-102533	B10	T:T	4.97442	1.00458	rs35870237	102513			E39
4809901	PD_Controls 2_KZ_102438-102533	C10	T:T	5.73752	0.93663	rs35870237	102514			I39
4809901	PD_Controls 2_KZ_102438-102533	D10	T:T	5.21015	0.74815	rs35870237	102515			M39
4809901	PD_Controls 2_KZ_102438-102533	E10	T:T	5.17928	0.75231	rs35870237	102516			Q39
4809901	PD_Controls 2_KZ_102438-102533	F10	T:T	5.60297	0.84391	rs35870237	102517			U39
4809901	PD_Controls 2_KZ_102438-102533	G10	T:T	4.80738	0.82545	rs35870237	102518			Y39
4809901	PD_Controls 2_KZ_102438-102533	H10	T:T	5.04400	0.90606	rs35870237	102519			AC39
4809901	PD_Controls 2_KZ_102438-102533	A11	T:T	5.51136	0.86229	rs35870237	102520			A43
4809901	PD_Controls 2_KZ_102438-102533	B11	T:T	4.85249	0.97057	rs35870237	102521			E43
4809901	PD_Controls 2_KZ_102438-102533	C11	T:T	5.40676	0.68870	rs35870237	102522			I43
4809901	PD_Controls 2_KZ_102438-102533	D11	T:T	4.88343	0.68001	rs35870237	102523			M43
4809901	PD_Controls 2_KZ_102438-102533	E11	T:T	5.74989	0.74173	rs35870237	102524			Q43
4809901	PD_Controls 2_KZ_102438-102533	F11	T:T	5.20138	0.82748	rs35870237	102525			U43
4809901	PD_Controls 2_KZ_102438-102533	G11	T:T	4.89347	0.65573	rs35870237	102526			Y43
4809901	PD_Controls 2_KZ_102438-102533	H11	T:T	4.96585	0.60380	rs35870237	102527			AC43
4809901	PD_Controls 2_KZ_102438-102533	A12	T:T	5.85229	1.25687	rs35870237	102528			A47
4809901	PD_Controls 2_KZ_102438-102533	B12	T:T	5.41989	0.83519	rs35870237	102529			E47
4809901	PD_Controls 2_KZ_102438-102533	C12	T:T	5.53901	0.93357	rs35870237	102530			I47
4809901	PD_Controls 2_KZ_102438-102533	D12	T:T	5.22718	0.82201	rs35870237	102531			M47
4809901	PD_Controls 2_KZ_102438-102533	E12	T:T	5.31404	0.67304	rs35870237	102532			Q47
4809901	PD_Controls 2_KZ_102438-102533	F12	T:T	5.23164	0.79397	rs35870237	102533			U47
4809901	PD_Controls 2_KZ_102438-102533	G12	NTC	0.30136	0.42634	rs35870237				Y47
4809901	PD_Controls 2_KZ_102438-102533	H12	NTC	0.27996	0.66260	rs35870237				AC47
4809901	PD_Controls 3_KZ_102354-102535	A01	T:T	5.27060	0.76781	rs35870237	102354			C01
4809901	PD_Controls 3_KZ_102354-102535	B01	T:T	4.75808	0.86453	rs35870237	102491			G01
4809901	PD_Controls 3_KZ_102354-102535	C01	T:T	5.17756	0.72794	rs35870237	102340			K01
4809901	PD_Controls 3_KZ_102354-102535	D01	T:T	4.85649	0.64333	rs35870237	102357			O01
4809901	PD_Controls 3_KZ_102354-102535	E01	T:T	4.84694	1.20870	rs35870237	102412			S01
4809901	PD_Controls 3_KZ_102354-102535	F01	T:T	4.43102	0.70217	rs35870237	102419			W01
4809901	PD_Controls 3_KZ_102354-102535	G01	T:T	5.10633	0.75324	rs35870237	102432			AA01
4809901	PD_Controls 3_KZ_102354-102535	H01	T:T	5.23055	0.75123	rs35870237	102477			AE01
4809901	PD_Controls 3_KZ_102354-102535	A02	T:T	5.53066	0.87671	rs35870237	102436			C05
4809901	PD_Controls 3_KZ_102354-102535	B02	T:T	5.31857	0.93480	rs35870237	102437			G05
4809901	PD_Controls 3_KZ_102354-102535	C02	T:T	5.19844	0.68910	rs35870237	102534			K05
4809901	PD_Controls 3_KZ_102354-102535	D02	T:T	5.14019	0.79076	rs35870237	102535			O05
4809901	PD_Controls 3_KZ_102354-102535	G12	NTC	0.31920	0.63727	rs35870237				AA45
4809901	PD_Controls 3_KZ_102354-102535	H12	NTC	0.22316	0.57049	rs35870237				AE45
4809903	Plate 1 PD_98647-98740	A01	G:G	4.22087	1.07084	rs34637584	98647			D03
4809903	Plate 1 PD_98647-98740	B01	G:G	3.54276	0.79266	rs34637584	98648			H03
4809903	Plate 1 PD_98647-98740	C01	?	1.74014	0.76836	rs34637584	98649			L03
4809903	Plate 1 PD_98647-98740	D01	?	0.55141	0.80544	rs34637584	98650			P03
4809903	Plate 1 PD_98647-98740	E01	G:G	4.59332	0.74596	rs34637584	98651			T03
4809903	Plate 1 PD_98647-98740	F01	G:G	4.83571	0.70275	rs34637584	98652			X03
4809903	Plate 1 PD_98647-98740	G01	G:G	5.14299	0.76537	rs34637584	98653			AB03
4809903	Plate 1 PD_98647-98740	H01	G:G	3.17269	0.59921	rs34637584	98654			AF03
4809903	Plate 1 PD_98647-98740	A02	G:G	3.57436	0.72745	rs34637584	98655			D07
4809903	Plate 1 PD_98647-98740	B02	G:G	5.30767	0.75422	rs34637584	98656			H07
4809903	Plate 1 PD_98647-98740	C02	G:G	5.43577	0.97742	rs34637584	98657			L07
4809903	Plate 1 PD_98647-98740	D02	G:G	5.41652	0.84387	rs34637584	98658			P07
4809903	Plate 1 PD_98647-98740	E02	G:G	5.55548	0.92782	rs34637584	98659			T07
4809903	Plate 1 PD_98647-98740	F02	G:G	5.03100	0.83233	rs34637584	98660			X07
4809903	Plate 1 PD_98647-98740	G02	G:G	5.53916	1.03987	rs34637584	98661			AB07
4809903	Plate 1 PD_98647-98740	H02	G:G	4.98511	0.78897	rs34637584	98662			AF07
4809903	Plate 1 PD_98647-98740	A03	G:G	5.69023	1.17653	rs34637584	98663			D11
4809903	Plate 1 PD_98647-98740	B03	G:G	6.04490	1.07825	rs34637584	98664			H11
4809903	Plate 1 PD_98647-98740	C03	G:G	5.70387	1.18292	rs34637584	98665			L11
4809903	Plate 1 PD_98647-98740	D03	G:G	5.27259	0.97704	rs34637584	98666			P11
4809903	Plate 1 PD_98647-98740	E03	G:G	5.17160	0.97559	rs34637584	98667			T11
4809903	Plate 1 PD_98647-98740	F03	G:G	5.72494	0.91601	rs34637584	98668			X11
4809903	Plate 1 PD_98647-98740	G03	G:G	5.78328	0.99783	rs34637584	98669			AB11
4809903	Plate 1 PD_98647-98740	H03	G:G	4.92865	1.12672	rs34637584	98670			AF11
4809903	Plate 1 PD_98647-98740	A04	G:G	5.67412	0.82724	rs34637584	98671			D15
4809903	Plate 1 PD_98647-98740	B04	G:G	5.28347	0.90521	rs34637584	98672			H15
4809903	Plate 1 PD_98647-98740	C04	?	2.52873	0.81712	rs34637584	98673			L15
4809903	Plate 1 PD_98647-98740	D04	G:G	6.33982	1.19531	rs34637584	98674			P15
4809903	Plate 1 PD_98647-98740	E04	?	0.80312	0.86618	rs34637584	98675			T15
4809903	Plate 1 PD_98647-98740	F04	?	0.24785	0.48438	rs34637584	98676			X15
4809903	Plate 1 PD_98647-98740	G04	?	1.05093	0.73318	rs34637584	98677			AB15
4809903	Plate 1 PD_98647-98740	H04	?	0.50093	0.70182	rs34637584	98678			AF15
4809903	Plate 1 PD_98647-98740	A05	G:G	6.15734	1.13100	rs34637584	98679			D19
4809903	Plate 1 PD_98647-98740	B05	G:G	5.02090	1.00850	rs34637584	98680			H19
4809903	Plate 1 PD_98647-98740	C05	G:G	5.59046	1.19717	rs34637584	98681			L19
4809903	Plate 1 PD_98647-98740	D05	G:G	5.72338	1.16499	rs34637584	98682			P19
4809903	Plate 1 PD_98647-98740	E05	G:G	5.36191	1.06497	rs34637584	98683			T19
4809903	Plate 1 PD_98647-98740	F05	G:G	5.19257	1.06506	rs34637584	98684			X19
4809903	Plate 1 PD_98647-98740	G05	G:G	5.29023	1.06789	rs34637584	98685			AB19
4809903	Plate 1 PD_98647-98740	H05	G:G	5.17249	1.26819	rs34637584	98686			AF19
4809903	Plate 1 PD_98647-98740	A06	G:G	6.28332	1.53494	rs34637584	98687			D23
4809903	Plate 1 PD_98647-98740	B06	G:G	5.37697	1.09846	rs34637584	98688			H23
4809903	Plate 1 PD_98647-98740	C06	G:G	5.89707	1.43686	rs34637584	98689			L23
4809903	Plate 1 PD_98647-98740	D06	G:G	5.71967	1.18210	rs34637584	98690			P23
4809903	Plate 1 PD_98647-98740	E06	G:G	5.26348	1.02971	rs34637584	98691			T23
4809903	Plate 1 PD_98647-98740	F06	G:G	5.34386	1.30522	rs34637584	98692			X23
4809903	Plate 1 PD_98647-98740	G06	G:G	5.09438	1.22763	rs34637584	98693			AB23
4809903	Plate 1 PD_98647-98740	H06	G:G	5.35801	1.40002	rs34637584	98694			AF23
4809903	Plate 1 PD_98647-98740	A07	G:G	5.54849	1.36600	rs34637584	98695			D27
4809903	Plate 1 PD_98647-98740	B07	G:G	5.43675	1.13665	rs34637584	98696			H27
4809903	Plate 1 PD_98647-98740	C07	G:G	5.80896	1.28679	rs34637584	98697			L27
4809903	Plate 1 PD_98647-98740	D07	G:G	5.33347	1.07714	rs34637584	98698			P27
4809903	Plate 1 PD_98647-98740	E07	G:G	5.28593	1.27009	rs34637584	98699			T27
4809903	Plate 1 PD_98647-98740	F07	G:G	4.94040	1.10971	rs34637584	98700			X27
4809903	Plate 1 PD_98647-98740	G07	G:G	4.76164	1.11148	rs34637584	98701			AB27
4809903	Plate 1 PD_98647-98740	H07	G:G	4.76955	1.30253	rs34637584	98702			AF27
4809903	Plate 1 PD_98647-98740	A08	G:G	6.14337	1.44524	rs34637584	98703			D31
4809903	Plate 1 PD_98647-98740	B08	G:G	5.48683	1.24321	rs34637584	98704			H31
4809903	Plate 1 PD_98647-98740	C08	G:G	5.44800	1.04612	rs34637584	98705			L31
4809903	Plate 1 PD_98647-98740	D08	G:G	5.48378	1.20283	rs34637584	98706			P31
4809903	Plate 1 PD_98647-98740	E08	G:G	5.10956	1.21326	rs34637584	98707			T31
4809903	Plate 1 PD_98647-98740	F08	G:G	5.88252	1.28285	rs34637584	98708			X31
4809903	Plate 1 PD_98647-98740	G08	G:G	5.28396	1.22579	rs34637584	98709			AB31
4809903	Plate 1 PD_98647-98740	H08	G:G	5.55841	1.42215	rs34637584	98710			AF31
4809903	Plate 1 PD_98647-98740	A09	G:G	5.43403	1.34893	rs34637584	98711			D35
4809903	Plate 1 PD_98647-98740	B09	G:G	5.22753	1.07243	rs34637584	98712			H35
4809903	Plate 1 PD_98647-98740	C09	G:G	5.46067	1.07467	rs34637584	98713			L35
4809903	Plate 1 PD_98647-98740	D09	G:G	5.69570	1.19192	rs34637584	98714			P35
4809903	Plate 1 PD_98647-98740	E09	G:G	5.37364	0.95709	rs34637584	98715			T35
4809903	Plate 1 PD_98647-98740	F09	G:G	4.89243	0.97283	rs34637584	98716			X35
4809903	Plate 1 PD_98647-98740	G09	G:G	6.26110	1.46233	rs34637584	98717			AB35
4809903	Plate 1 PD_98647-98740	H09	G:G	5.21343	1.49153	rs34637584	98718			AF35
4809903	Plate 1 PD_98647-98740	A10	G:G	5.79589	1.52993	rs34637584	98719			D39
4809903	Plate 1 PD_98647-98740	B10	G:G	5.64450	1.06768	rs34637584	98720			H39
4809903	Plate 1 PD_98647-98740	C10	G:G	5.60405	1.25278	rs34637584	98721			L39
4809903	Plate 1 PD_98647-98740	D10	G:G	5.50192	1.00212	rs34637584	98722			P39
4809903	Plate 1 PD_98647-98740	E10	G:G	5.95620	1.05190	rs34637584	98723			T39
4809903	Plate 1 PD_98647-98740	F10	G:G	5.43594	1.14205	rs34637584	98724			X39
4809903	Plate 1 PD_98647-98740	G10	G:G	4.96716	1.19022	rs34637584	98725			AB39
4809903	Plate 1 PD_98647-98740	H10	G:G	5.09523	1.21460	rs34637584	98726			AF39
4809903	Plate 1 PD_98647-98740	A11	G:G	5.57560	1.20898	rs34637584	98727			D43
4809903	Plate 1 PD_98647-98740	B11	G:G	5.81206	1.33679	rs34637584	98728			H43
4809903	Plate 1 PD_98647-98740	C11	G:G	5.57115	1.05424	rs34637584	98729			L43
4809903	Plate 1 PD_98647-98740	D11	G:G	5.46067	1.03595	rs34637584	98730			P43
4809903	Plate 1 PD_98647-98740	E11	G:G	5.41118	1.19100	rs34637584	98731			T43
4809903	Plate 1 PD_98647-98740	F11	G:G	5.46081	1.02204	rs34637584	98732			X43
4809903	Plate 1 PD_98647-98740	G11	G:G	5.19459	1.08869	rs34637584	98733			AB43
4809903	Plate 1 PD_98647-98740	H11	G:G	5.43111	1.33484	rs34637584	98734			AF43
4809903	Plate 1 PD_98647-98740	A12	G:G	5.10582	1.19909	rs34637584	98735			D47
4809903	Plate 1 PD_98647-98740	B12	G:G	5.16902	1.20147	rs34637584	98736			H47
4809903	Plate 1 PD_98647-98740	C12	G:G	5.33945	1.25343	rs34637584	98737			L47
4809903	Plate 1 PD_98647-98740	D12	G:G	5.70008	1.29947	rs34637584	98738			P47
4809903	Plate 1 PD_98647-98740	E12	G:G	5.12291	1.12247	rs34637584	98739			T47
4809903	Plate 1 PD_98647-98740	F12	G:G	6.07203	1.19599	rs34637584	98740			X47
4809903	Plate 1 PD_98647-98740	G12	NTC	0.27461	0.82330	rs34637584				AB47
4809903	Plate 1 PD_98647-98740	H12	NTC	0.36518	0.69096	rs34637584				AF47
4809903	Plate 2 PD_102271-98764	A01	G:G	5.51716	1.14144	rs34637584	102171			B02
4809903	Plate 2 PD_102271-98764	B01	G:G	5.18494	0.93648	rs34637584	102172			F02
4809903	Plate 2 PD_102271-98764	C01	G:G	5.28414	1.19312	rs34637584	102173			J02
4809903	Plate 2 PD_102271-98764	D01	G:G	5.62779	1.05882	rs34637584	102174			N02
4809903	Plate 2 PD_102271-98764	E01	G:G	5.69473	1.07550	rs34637584	102175			R02
4809903	Plate 2 PD_102271-98764	F01	G:G	5.44091	0.86408	rs34637584	102176			V02
4809903	Plate 2 PD_102271-98764	G01	G:G	6.46929	1.08483	rs34637584	102177			Z02
4809903	Plate 2 PD_102271-98764	H01	G:G	5.22885	1.03158	rs34637584	102178			AD02
4809903	Plate 2 PD_102271-98764	A02	G:G	5.65416	1.05971	rs34637584	102179			B06
4809903	Plate 2 PD_102271-98764	B02	G:G	5.75029	1.11635	rs34637584	102180			F06
4809903	Plate 2 PD_102271-98764	C02	G:G	5.85120	1.35999	rs34637584	102181			J06
4809903	Plate 2 PD_102271-98764	D02	G:G	5.66042	1.03169	rs34637584	102182			N06
4809903	Plate 2 PD_102271-98764	E02	G:G	5.89470	0.65111	rs34637584	102183			R06
4809903	Plate 2 PD_102271-98764	F02	G:G	5.04679	1.27757	rs34637584	102184			V06
4809903	Plate 2 PD_102271-98764	G02	G:G	4.55437	1.57687	rs34637584	102185			Z06
4809903	Plate 2 PD_102271-98764	H02	G:G	5.31846	1.26172	rs34637584	102186			AD06
4809903	Plate 2 PD_102271-98764	A03	G:G	5.73619	1.20521	rs34637584	102187			B10
4809903	Plate 2 PD_102271-98764	B03	G:G	5.80655	1.13189	rs34637584	102189			F10
4809903	Plate 2 PD_102271-98764	C03	G:G	5.46315	1.06337	rs34637584	102190			J10
4809903	Plate 2 PD_102271-98764	D03	G:G	5.47142	0.89402	rs34637584	102191			N10
4809903	Plate 2 PD_102271-98764	E03	G:G	5.47430	1.05394	rs34637584	102192			R10
4809903	Plate 2 PD_102271-98764	F03	G:G	5.05244	1.05435	rs34637584	102193			V10
4809903	Plate 2 PD_102271-98764	G03	G:G	5.61126	0.99319	rs34637584	102194			Z10
4809903	Plate 2 PD_102271-98764	H03	G:G	4.75495	1.08543	rs34637584	102195			AD10
4809903	Plate 2 PD_102271-98764	A04	G:G	5.94560	1.39756	rs34637584	102196			B14
4809903	Plate 2 PD_102271-98764	B04	G:G	5.69473	1.39605	rs34637584	102197			F14
4809903	Plate 2 PD_102271-98764	C04	G:G	5.30227	1.04939	rs34637584	102198			J14
4809903	Plate 2 PD_102271-98764	D04	G:G	5.51288	1.12147	rs34637584	102199			N14
4809903	Plate 2 PD_102271-98764	E04	G:G	4.97562	0.88962	rs34637584	102200			R14
4809903	Plate 2 PD_102271-98764	F04	G:G	5.24796	1.06506	rs34637584	102201			V14
4809903	Plate 2 PD_102271-98764	G04	G:G	5.47407	1.11522	rs34637584	102202			Z14
4809903	Plate 2 PD_102271-98764	H04	G:G	5.68090	0.85048	rs34637584	102203			AD14
4809903	Plate 2 PD_102271-98764	A05	G:G	5.65734	1.48019	rs34637584	102204			B18
4809903	Plate 2 PD_102271-98764	B05	G:G	6.11201	1.52080	rs34637584	102205			F18
4809903	Plate 2 PD_102271-98764	C05	G:G	5.92198	1.27182	rs34637584	102206			J18
4809903	Plate 2 PD_102271-98764	D05	G:G	5.48070	1.24246	rs34637584	102207			N18
4809903	Plate 2 PD_102271-98764	E05	G:G	5.84443	1.26148	rs34637584	102208			R18
4809903	Plate 2 PD_102271-98764	F05	G:G	5.01405	1.19069	rs34637584	102209			V18
4809903	Plate 2 PD_102271-98764	G05	G:G	4.99138	1.11851	rs34637584	102210			Z18
4809903	Plate 2 PD_102271-98764	H05	G:G	5.49433	1.55928	rs34637584	102211			AD18
4809903	Plate 2 PD_102271-98764	A06	G:G	5.77206	1.44231	rs34637584	102212			B22
4809903	Plate 2 PD_102271-98764	B06	G:G	5.58115	1.08444	rs34637584	102213			F22
4809903	Plate 2 PD_102271-98764	C06	G:G	5.66025	1.11315	rs34637584	102214			J22
4809903	Plate 2 PD_102271-98764	D06	G:G	5.07908	1.18931	rs34637584	102215			N22
4809903	Plate 2 PD_102271-98764	E06	G:G	5.82731	1.32730	rs34637584	102216			R22
4809903	Plate 2 PD_102271-98764	F06	G:G	5.40362	1.20481	rs34637584	102217			V22
4809903	Plate 2 PD_102271-98764	G06	G:G	5.14600	1.09211	rs34637584	102218			Z22
4809903	Plate 2 PD_102271-98764	H06	G:G	5.41494	1.60296	rs34637584	102219			AD22
4809903	Plate 2 PD_102271-98764	A07	G:G	5.03011	1.40956	rs34637584	102221			B26
4809903	Plate 2 PD_102271-98764	B07	G:G	5.80640	1.13439	rs34637584	102222			F26
4809903	Plate 2 PD_102271-98764	C07	G:G	5.99039	1.39560	rs34637584	102223			J26
4809903	Plate 2 PD_102271-98764	D07	G:G	5.65490	1.20345	rs34637584	102224			N26
4809903	Plate 2 PD_102271-98764	E07	G:G	5.24810	1.10538	rs34637584	102225			R26
4809903	Plate 2 PD_102271-98764	F07	G:G	5.42504	1.24242	rs34637584	102226			V26
4809903	Plate 2 PD_102271-98764	G07	G:G	5.14705	1.24372	rs34637584	102227			Z26
4809903	Plate 2 PD_102271-98764	H07	G:G	5.58382	1.46564	rs34637584	102228			AD26
4809903	Plate 2 PD_102271-98764	A08	G:G	5.36896	1.39876	rs34637584	102229			B30
4809903	Plate 2 PD_102271-98764	B08	G:G	5.63464	1.19713	rs34637584	102230			F30
4809903	Plate 2 PD_102271-98764	C08	G:G	6.03594	1.27904	rs34637584	102231			J30
4809903	Plate 2 PD_102271-98764	D08	G:G	5.97077	1.32961	rs34637584	102232			N30
4809903	Plate 2 PD_102271-98764	E08	G:G	5.11853	1.10878	rs34637584	102233			R30
4809903	Plate 2 PD_102271-98764	F08	G:G	5.21025	1.25284	rs34637584	102234			V30
4809903	Plate 2 PD_102271-98764	G08	G:G	5.54743	1.28714	rs34637584	102235			Z30
4809903	Plate 2 PD_102271-98764	H08	G:G	5.73109	1.25913	rs34637584	102236			AD30
4809903	Plate 2 PD_102271-98764	A09	G:G	6.30998	1.45358	rs34637584	102237			B34
4809903	Plate 2 PD_102271-98764	B09	G:G	5.47789	1.27183	rs34637584	102238			F34
4809903	Plate 2 PD_102271-98764	C09	G:G	4.89551	1.12582	rs34637584	102239			J34
4809903	Plate 2 PD_102271-98764	D09	G:G	5.00268	1.16623	rs34637584	102241			N34
4809903	Plate 2 PD_102271-98764	E09	G:G	5.35768	1.07963	rs34637584	102242			R34
4809903	Plate 2 PD_102271-98764	F09	G:G	5.43857	1.04325	rs34637584	102243			V34
4809903	Plate 2 PD_102271-98764	G09	G:G	5.58651	1.19338	rs34637584	102244			Z34
4809903	Plate 2 PD_102271-98764	H09	G:G	5.14278	1.22715	rs34637584	102245			AD34
4809903	Plate 2 PD_102271-98764	A10	G:G	5.99676	1.68549	rs34637584	102246			B38
4809903	Plate 2 PD_102271-98764	B10	G:G	6.10263	1.29553	rs34637584	102247			F38
4809903	Plate 2 PD_102271-98764	C10	G:G	5.79765	1.24622	rs34637584	102248			J38
4809903	Plate 2 PD_102271-98764	D10	G:G	6.25673	1.11698	rs34637584	102249			N38
4809903	Plate 2 PD_102271-98764	E10	G:G	5.78241	1.17639	rs34637584	102250			R38
4809903	Plate 2 PD_102271-98764	F10	G:G	5.21127	0.87028	rs34637584	102251			V38
4809903	Plate 2 PD_102271-98764	G10	G:G	5.25179	1.28998	rs34637584	102252			Z38
4809903	Plate 2 PD_102271-98764	H10	G:G	5.45646	1.21723	rs34637584	102253			AD38
4809903	Plate 2 PD_102271-98764	A11	G:G	5.65142	1.21460	rs34637584	102254			B42
4809903	Plate 2 PD_102271-98764	B11	G:G	5.57929	1.33787	rs34637584	102256			F42
4809903	Plate 2 PD_102271-98764	C11	G:G	5.81917	1.18703	rs34637584	102258			J42
4809903	Plate 2 PD_102271-98764	D11	G:G	5.87025	1.12121	rs34637584	102259			N42
4809903	Plate 2 PD_102271-98764	E11	G:G	6.12224	1.24706	rs34637584	102260			R42
4809903	Plate 2 PD_102271-98764	F11	G:G	5.06400	1.02153	rs34637584	102263			V42
4809903	Plate 2 PD_102271-98764	G11	G:G	5.52012	1.27972	rs34637584	102265			Z42
4809903	Plate 2 PD_102271-98764	H11	G:G	5.46110	1.18573	rs34637584	102267			AD42
4809903	Plate 2 PD_102271-98764	A12	?	5.77636	2.02382	rs34637584	102269			B46
4809903	Plate 2 PD_102271-98764	B12	G:G	5.73498	1.28710	rs34637584	102270			F46
4809903	Plate 2 PD_102271-98764	C12	G:G	5.74122	1.45102	rs34637584	102240			J46
4809903	Plate 2 PD_102271-98764	D12	G:G	5.65583	1.56724	rs34637584	98762			N46
4809903	Plate 2 PD_102271-98764	E12	G:G	5.49301	1.18906	rs34637584	98763			R46
4809903	Plate 2 PD_102271-98764	F12	G:G	5.59550	1.28797	rs34637584	98764			V46
4809903	Plate 2 PD_102271-98764	G12	NTC	0.36461	1.10000	rs34637584				Z46
4809903	Plate 2 PD_102271-98764	H12	NTC	0.44420	0.84765	rs34637584				AD46
4809903	Plate 3 PD_102271-98766	A01	G:G	6.01732	1.36983	rs34637584	102271			B04
4809903	Plate 3 PD_102271-98766	B01	G:G	5.91581	1.19850	rs34637584	102272			F04
4809903	Plate 3 PD_102271-98766	C01	G:G	5.62647	1.05098	rs34637584	102273			J04
4809903	Plate 3 PD_102271-98766	D01	G:G	5.27482	0.93936	rs34637584	102275			N04
4809903	Plate 3 PD_102271-98766	E01	G:G	5.39675	0.91015	rs34637584	102276			R04
4809903	Plate 3 PD_102271-98766	F01	G:G	5.85137	1.21471	rs34637584	102277			V04
4809903	Plate 3 PD_102271-98766	G01	G:G	5.23574	0.93688	rs34637584	102280			Z04
4809903	Plate 3 PD_102271-98766	H01	G:G	5.69990	1.28638	rs34637584	102281			AD04
4809903	Plate 3 PD_102271-98766	A02	G:G	5.16901	0.97555	rs34637584	102282			B08
4809903	Plate 3 PD_102271-98766	B02	G:G	5.28652	1.03409	rs34637584	102284			F08
4809903	Plate 3 PD_102271-98766	C02	G:G	5.34447	1.02777	rs34637584	102285			J08
4809903	Plate 3 PD_102271-98766	D02	G:G	5.65622	0.98762	rs34637584	102286			N08
4809903	Plate 3 PD_102271-98766	E02	G:G	5.85659	1.19449	rs34637584	102287			R08
4809903	Plate 3 PD_102271-98766	F02	G:G	5.44875	1.06990	rs34637584	102288			V08
4809903	Plate 3 PD_102271-98766	G02	G:G	5.23819	0.94074	rs34637584	102289			Z08
4809903	Plate 3 PD_102271-98766	H02	G:G	4.78038	1.23997	rs34637584	102291			AD08
4809903	Plate 3 PD_102271-98766	A03	G:G	5.36027	1.32346	rs34637584	102292			B12
4809903	Plate 3 PD_102271-98766	B03	G:G	5.62849	1.13347	rs34637584	102293			F12
4809903	Plate 3 PD_102271-98766	C03	G:G	5.58091	0.95706	rs34637584	102294			J12
4809903	Plate 3 PD_102271-98766	D03	G:G	5.26018	1.04547	rs34637584	102295			N12
4809903	Plate 3 PD_102271-98766	E03	G:G	5.16316	1.01924	rs34637584	102296			R12
4809903	Plate 3 PD_102271-98766	F03	?	0.36588	0.63360	rs34637584	102297			V12
4809903	Plate 3 PD_102271-98766	G03	G:G	5.81189	1.08767	rs34637584	102298			Z12
4809903	Plate 3 PD_102271-98766	H03	G:G	4.93870	1.06578	rs34637584	102300			AD12
4809903	Plate 3 PD_102271-98766	A04	G:G	5.53407	1.17445	rs34637584	102301			B16
4809903	Plate 3 PD_102271-98766	B04	G:G	5.34645	1.05520	rs34637584	102302			F16
4809903	Plate 3 PD_102271-98766	C04	G:G	5.57532	1.14213	rs34637584	102304			J16
4809903	Plate 3 PD_102271-98766	D04	G:G	6.03580	1.10710	rs34637584	102306			N16
4809903	Plate 3 PD_102271-98766	E04	G:G	5.29959	1.16163	rs34637584	102308			R16
4809903	Plate 3 PD_102271-98766	F04	G:G	5.25388	1.03566	rs34637584	102310			V16
4809903	Plate 3 PD_102271-98766	G04	G:G	5.84406	1.17279	rs34637584	102311			Z16
4809903	Plate 3 PD_102271-98766	H04	G:G	5.20524	1.27946	rs34637584	102312			AD16
4809903	Plate 3 PD_102271-98766	A05	G:G	6.51427	1.51525	rs34637584	102313			B20
4809903	Plate 3 PD_102271-98766	B05	G:G	5.74506	1.18845	rs34637584	102315			F20
4809903	Plate 3 PD_102271-98766	C05	G:G	6.02727	1.32372	rs34637584	102316			J20
4809903	Plate 3 PD_102271-98766	D05	G:G	5.61278	1.14181	rs34637584	102317			N20
4809903	Plate 3 PD_102271-98766	E05	G:G	5.51005	1.02532	rs34637584	102318			R20
4809903	Plate 3 PD_102271-98766	F05	G:G	5.44083	1.24659	rs34637584	102319			V20
4809903	Plate 3 PD_102271-98766	G05	G:G	5.03389	1.20105	rs34637584	102320			Z20
4809903	Plate 3 PD_102271-98766	H05	G:G	5.45535	0.70477	rs34637584	102321			AD20
4809903	Plate 3 PD_102271-98766	A06	G:G	5.92921	1.61276	rs34637584	102322			B24
4809903	Plate 3 PD_102271-98766	B06	G:G	5.48048	1.17445	rs34637584	102188			F24
4809903	Plate 3 PD_102271-98766	C06	?	0.38170	0.75127	rs34637584	102324			J24
4809903	Plate 3 PD_102271-98766	D06	G:G	5.48457	1.04643	rs34637584	102325			N24
4809903	Plate 3 PD_102271-98766	E06	G:G	5.77769	1.15978	rs34637584	102326			R24
4809903	Plate 3 PD_102271-98766	F06	G:G	5.05157	0.95841	rs34637584	102327			V24
4809903	Plate 3 PD_102271-98766	G06	G:G	5.21838	1.12365	rs34637584	102328			Z24
4809903	Plate 3 PD_102271-98766	H06	G:G	5.08319	1.32160	rs34637584	102329			AD24
4809903	Plate 3 PD_102271-98766	A07	G:G	4.36373	1.18136	rs34637584	102330			B28
4809903	Plate 3 PD_102271-98766	B07	G:G	5.28603	1.14972	rs34637584	102331			F28
4809903	Plate 3 PD_102271-98766	C07	G:G	5.92455	1.06116	rs34637584	102332			J28
4809903	Plate 3 PD_102271-98766	D07	G:G	5.38998	0.99632	rs34637584	102333			N28
4809903	Plate 3 PD_102271-98766	E07	G:G	5.48745	1.10996	rs34637584	102334			R28
4809903	Plate 3 PD_102271-98766	F07	G:G	5.09984	0.95424	rs34637584	102335			V28
4809903	Plate 3 PD_102271-98766	G07	G:G	4.94309	1.05973	rs34637584	98760			Z28
4809903	Plate 3 PD_102271-98766	H07	G:G	4.69536	1.10854	rs34637584	98761			AD28
4809903	Plate 3 PD_102271-98766	A08	G:G	5.69477	1.43607	rs34637584	98765			B32
4809903	Plate 3 PD_102271-98766	B08	G:G	5.99161	1.33228	rs34637584	98766			F32
4809903	Plate 3 PD_102271-98766	G12	NTC	0.20680	0.75611	rs34637584				Z48
4809903	Plate 3 PD_102271-98766	H12	NTC	0.52834	1.23735	rs34637584				AD48
4809903	PD_Controls 1_KZ_102336-102435	A01	G:G	5.31587	0.99804	rs34637584	102336			B01
4809903	PD_Controls 1_KZ_102336-102435	B01	G:G	6.00160	1.01371	rs34637584	102345			F01
4809903	PD_Controls 1_KZ_102336-102435	C01	G:G	5.73154	1.23234	rs34637584	102337			J01
4809903	PD_Controls 1_KZ_102336-102435	D01	G:G	5.45916	1.28192	rs34637584	102339			N01
4809903	PD_Controls 1_KZ_102336-102435	E01	G:G	5.74429	1.14429	rs34637584	102341			R01
4809903	PD_Controls 1_KZ_102336-102435	F01	G:G	5.19059	0.90653	rs34637584	102342			V01
4809903	PD_Controls 1_KZ_102336-102435	G01	G:G	5.19462	0.94557	rs34637584	102343			Z01
4809903	PD_Controls 1_KZ_102336-102435	H01	G:G	5.44001	1.01602	rs34637584	102344			AD01
4809903	PD_Controls 1_KZ_102336-102435	A02	G:G	5.59746	1.15970	rs34637584	102338			B05
4809903	PD_Controls 1_KZ_102336-102435	B02	G:G	5.85628	1.13046	rs34637584	102346			F05
4809903	PD_Controls 1_KZ_102336-102435	C02	G:G	5.59815	0.93397	rs34637584	102347			J05
4809903	PD_Controls 1_KZ_102336-102435	D02	G:G	5.94011	1.07231	rs34637584	102348			N05
4809903	PD_Controls 1_KZ_102336-102435	E02	G:G	5.59623	0.96392	rs34637584	102349			R05
4809903	PD_Controls 1_KZ_102336-102435	F02	G:G	5.60529	1.09283	rs34637584	102350			V05
4809903	PD_Controls 1_KZ_102336-102435	G02	G:G	5.72696	1.14040	rs34637584	102351			Z05
4809903	PD_Controls 1_KZ_102336-102435	H02	G:G	5.15652	0.97385	rs34637584	102352			AD05
4809903	PD_Controls 1_KZ_102336-102435	A03	G:G	5.87873	1.22981	rs34637584	102353			B09
4809903	PD_Controls 1_KZ_102336-102435	B03	G:G	5.61348	1.28094	rs34637584	102355			F09
4809903	PD_Controls 1_KZ_102336-102435	C03	G:G	5.54989	1.06517	rs34637584	102356			J09
4809903	PD_Controls 1_KZ_102336-102435	D03	G:G	6.01318	1.29831	rs34637584	102358			N09
4809903	PD_Controls 1_KZ_102336-102435	E03	G:G	5.34592	1.07411	rs34637584	102359			R09
4809903	PD_Controls 1_KZ_102336-102435	F03	G:G	5.53693	1.14125	rs34637584	102360			V09
4809903	PD_Controls 1_KZ_102336-102435	G03	G:G	5.18514	0.97619	rs34637584	102361			Z09
4809903	PD_Controls 1_KZ_102336-102435	H03	G:G	4.82519	0.99621	rs34637584	102362			AD09
4809903	PD_Controls 1_KZ_102336-102435	A04	G:G	6.07720	1.64495	rs34637584	102363			B13
4809903	PD_Controls 1_KZ_102336-102435	B04	G:G	6.05787	1.37311	rs34637584	102364			F13
4809903	PD_Controls 1_KZ_102336-102435	C04	G:G	6.06066	1.29338	rs34637584	102365			J13
4809903	PD_Controls 1_KZ_102336-102435	D04	G:G	6.21337	1.26153	rs34637584	102366			N13
4809903	PD_Controls 1_KZ_102336-102435	E04	G:G	5.93094	1.04224	rs34637584	102367			R13
4809903	PD_Controls 1_KZ_102336-102435	F04	G:G	5.18672	1.07422	rs34637584	102368			V13
4809903	PD_Controls 1_KZ_102336-102435	G04	G:G	5.26804	1.06195	rs34637584	102369			Z13
4809903	PD_Controls 1_KZ_102336-102435	H04	G:G	4.85652	0.95023	rs34637584	102370			AD13
4809903	PD_Controls 1_KZ_102336-102435	A05	G:G	5.82903	1.44118	rs34637584	102371			B17
4809903	PD_Controls 1_KZ_102336-102435	B05	G:G	5.85273	1.29075	rs34637584	102372			F17
4809903	PD_Controls 1_KZ_102336-102435	C05	G:G	5.41007	1.13243	rs34637584	102373			J17
4809903	PD_Controls 1_KZ_102336-102435	D05	G:G	5.22622	1.07711	rs34637584	102374			N17
4809903	PD_Controls 1_KZ_102336-102435	E05	G:G	5.22014	0.88101	rs34637584	102375			R17
4809903	PD_Controls 1_KZ_102336-102435	F05	G:G	5.47498	1.13368	rs34637584	102376			V17
4809903	PD_Controls 1_KZ_102336-102435	G05	G:G	5.14440	1.17489	rs34637584	102377			Z17
4809903	PD_Controls 1_KZ_102336-102435	H05	G:G	5.14172	0.90337	rs34637584	102378			AD17
4809903	PD_Controls 1_KZ_102336-102435	A06	G:G	5.85481	1.60196	rs34637584	102379			B21
4809903	PD_Controls 1_KZ_102336-102435	B06	G:G	5.36800	1.10181	rs34637584	102380			F21
4809903	PD_Controls 1_KZ_102336-102435	C06	G:G	5.53919	1.09454	rs34637584	102381			J21
4809903	PD_Controls 1_KZ_102336-102435	D06	G:G	5.32178	1.10451	rs34637584	102382			N21
4809903	PD_Controls 1_KZ_102336-102435	E06	G:G	5.40642	1.05586	rs34637584	102383			R21
4809903	PD_Controls 1_KZ_102336-102435	F06	G:G	5.11575	1.21360	rs34637584	102384			V21
4809903	PD_Controls 1_KZ_102336-102435	G06	G:G	5.42314	1.29854	rs34637584	102385			Z21
4809903	PD_Controls 1_KZ_102336-102435	H06	G:G	5.26944	1.35164	rs34637584	102386			AD21
4809903	PD_Controls 1_KZ_102336-102435	A07	G:G	5.98676	1.52809	rs34637584	102387			B25
4809903	PD_Controls 1_KZ_102336-102435	B07	G:G	5.34031	0.92852	rs34637584	102388			F25
4809903	PD_Controls 1_KZ_102336-102435	C07	G:G	5.86039	1.18927	rs34637584	102389			J25
4809903	PD_Controls 1_KZ_102336-102435	D07	G:G	5.72014	1.07661	rs34637584	102390			N25
4809903	PD_Controls 1_KZ_102336-102435	E07	G:G	5.11048	1.12081	rs34637584	102391			R25
4809903	PD_Controls 1_KZ_102336-102435	F07	G:G	5.50947	1.24394	rs34637584	102392			V25
4809903	PD_Controls 1_KZ_102336-102435	G07	G:G	5.46743	1.14524	rs34637584	102393			Z25
4809903	PD_Controls 1_KZ_102336-102435	H07	G:G	6.17190	1.52438	rs34637584	102394			AD25
4809903	PD_Controls 1_KZ_102336-102435	A08	G:G	5.75875	1.58820	rs34637584	102395			B29
4809903	PD_Controls 1_KZ_102336-102435	B08	G:G	5.40848	1.21424	rs34637584	102396			F29
4809903	PD_Controls 1_KZ_102336-102435	C08	G:G	5.37126	1.13864	rs34637584	102397			J29
4809903	PD_Controls 1_KZ_102336-102435	D08	G:G	5.25287	1.14630	rs34637584	102398			N29
4809903	PD_Controls 1_KZ_102336-102435	E08	G:G	5.69383	1.04290	rs34637584	102399			R29
4809903	PD_Controls 1_KZ_102336-102435	F08	G:G	5.51225	1.10947	rs34637584	102400			V29
4809903	PD_Controls 1_KZ_102336-102435	G08	G:G	5.25804	1.18636	rs34637584	102401			Z29
4809903	PD_Controls 1_KZ_102336-102435	H08	G:G	5.83033	1.42735	rs34637584	102402			AD29
4809903	PD_Controls 1_KZ_102336-102435	A09	G:G	5.21867	1.19895	rs34637584	102403			B33
4809903	PD_Controls 1_KZ_102336-102435	B09	G:G	5.71570	1.23990	rs34637584	102413			F33
4809903	PD_Controls 1_KZ_102336-102435	C09	G:G	5.78303	0.92319	rs34637584	102405			J33
4809903	PD_Controls 1_KZ_102336-102435	D09	G:G	5.28977	1.09657	rs34637584	102406			N33
4809903	PD_Controls 1_KZ_102336-102435	E09	?	4.82891	2.30652	rs34637584	102407			R33
4809903	PD_Controls 1_KZ_102336-102435	F09	G:G	5.80467	1.17304	rs34637584	102408			V33
4809903	PD_Controls 1_KZ_102336-102435	G09	G:G	4.68592	1.12781	rs34637584	102409			Z33
4809903	PD_Controls 1_KZ_102336-102435	H09	G:G	5.07983	1.18391	rs34637584	102410			AD33
4809903	PD_Controls 1_KZ_102336-102435	A10	G:G	5.44640	1.24475	rs34637584	102411			B37
4809903	PD_Controls 1_KZ_102336-102435	B10	G:G	5.49279	1.19642	rs34637584	102404			F37
4809903	PD_Controls 1_KZ_102336-102435	C10	G:G	5.93680	1.29334	rs34637584	102414			J37
4809903	PD_Controls 1_KZ_102336-102435	D10	G:G	5.68078	1.06765	rs34637584	102415			N37
4809903	PD_Controls 1_KZ_102336-102435	E10	G:G	5.57545	1.15710	rs34637584	102416			R37
4809903	PD_Controls 1_KZ_102336-102435	F10	G:G	5.60259	0.91343	rs34637584	102417			V37
4809903	PD_Controls 1_KZ_102336-102435	G10	G:G	5.56205	1.09126	rs34637584	102418			Z37
4809903	PD_Controls 1_KZ_102336-102435	H10	G:G	4.99209	1.49568	rs34637584	102420			AD37
4809903	PD_Controls 1_KZ_102336-102435	A11	G:G	5.35380	1.20695	rs34637584	102421			B41
4809903	PD_Controls 1_KZ_102336-102435	B11	G:G	5.58493	1.32262	rs34637584	102422			F41
4809903	PD_Controls 1_KZ_102336-102435	C11	G:G	6.33484	1.29003	rs34637584	102423			J41
4809903	PD_Controls 1_KZ_102336-102435	D11	G:G	5.17725	0.67328	rs34637584	102424			N41
4809903	PD_Controls 1_KZ_102336-102435	E11	G:G	5.50853	1.36900	rs34637584	102425			R41
4809903	PD_Controls 1_KZ_102336-102435	F11	G:G	5.61505	0.99897	rs34637584	102426			V41
4809903	PD_Controls 1_KZ_102336-102435	G11	G:G	5.69357	1.10383	rs34637584	102427			Z41
4809903	PD_Controls 1_KZ_102336-102435	H11	G:G	5.35402	1.32436	rs34637584	102428			AD41
4809903	PD_Controls 1_KZ_102336-102435	A12	G:G	5.89605	1.61505	rs34637584	102429			B45
4809903	PD_Controls 1_KZ_102336-102435	B12	G:G	5.39291	1.12804	rs34637584	102430			F45
4809903	PD_Controls 1_KZ_102336-102435	C12	G:G	6.10190	0.91167	rs34637584	102431			J45
4809903	PD_Controls 1_KZ_102336-102435	D12	G:G	5.35622	1.23712	rs34637584	102433			N45
4809903	PD_Controls 1_KZ_102336-102435	E12	G:G	5.89670	1.04809	rs34637584	102434			R45
4809903	PD_Controls 1_KZ_102336-102435	F12	G:G	5.13887	1.05719	rs34637584	102435			V45
4809903	PD_Controls 1_KZ_102336-102435	G12	NTC	0.27828	0.72757	rs34637584				Z45
4809903	PD_Controls 1_KZ_102336-102435	H12	NTC	0.19399	0.55165	rs34637584				AD45
4809903	PD_Controls 2_KZ_102438-102533	A01	G:G	5.88099	1.28401	rs34637584	102438			B03
4809903	PD_Controls 2_KZ_102438-102533	B01	G:G	5.62647	1.11153	rs34637584	102439			F03
4809903	PD_Controls 2_KZ_102438-102533	C01	G:G	5.86916	1.04001	rs34637584	102440			J03
4809903	PD_Controls 2_KZ_102438-102533	D01	G:G	6.62913	1.08071	rs34637584	102441			N03
4809903	PD_Controls 2_KZ_102438-102533	E01	G:G	5.79857	1.13936	rs34637584	102442			R03
4809903	PD_Controls 2_KZ_102438-102533	F01	?	1.91368	0.58200	rs34637584	102443			V03
4809903	PD_Controls 2_KZ_102438-102533	G01	G:G	5.19006	1.18827	rs34637584	102444			Z03
4809903	PD_Controls 2_KZ_102438-102533	H01	G:G	6.07622	1.10465	rs34637584	102445			AD03
4809903	PD_Controls 2_KZ_102438-102533	A02	G:G	5.65458	1.26235	rs34637584	102446			B07
4809903	PD_Controls 2_KZ_102438-102533	B02	G:G	5.73365	0.96653	rs34637584	102447			F07
4809903	PD_Controls 2_KZ_102438-102533	C02	G:G	5.23958	0.86751	rs34637584	102448			J07
4809903	PD_Controls 2_KZ_102438-102533	D02	G:G	5.36399	1.04460	rs34637584	102449			N07
4809903	PD_Controls 2_KZ_102438-102533	E02	G:G	5.54765	1.05511	rs34637584	102450			R07
4809903	PD_Controls 2_KZ_102438-102533	F02	G:G	5.77769	0.89620	rs34637584	102451			V07
4809903	PD_Controls 2_KZ_102438-102533	G02	G:G	5.29684	1.07603	rs34637584	102452			Z07
4809903	PD_Controls 2_KZ_102438-102533	H02	G:G	5.09204	1.06792	rs34637584	102453			AD07
4809903	PD_Controls 2_KZ_102438-102533	A03	G:G	5.62720	1.18462	rs34637584	102454			B11
4809903	PD_Controls 2_KZ_102438-102533	B03	G:G	5.41093	1.01364	rs34637584	102455			F11
4809903	PD_Controls 2_KZ_102438-102533	C03	G:G	5.54761	1.06751	rs34637584	102456			J11
4809903	PD_Controls 2_KZ_102438-102533	D03	G:G	5.66386	1.09459	rs34637584	102457			N11
4809903	PD_Controls 2_KZ_102438-102533	E03	G:G	5.87224	1.16664	rs34637584	102458			R11
4809903	PD_Controls 2_KZ_102438-102533	F03	G:G	5.59592	0.98532	rs34637584	102459			V11
4809903	PD_Controls 2_KZ_102438-102533	G03	G:G	5.14730	1.04619	rs34637584	102460			Z11
4809903	PD_Controls 2_KZ_102438-102533	H03	G:G	5.90674	1.30115	rs34637584	102461			AD11
4809903	PD_Controls 2_KZ_102438-102533	A04	G:G	5.64924	1.48460	rs34637584	102462			B15
4809903	PD_Controls 2_KZ_102438-102533	B04	G:G	6.36622	1.58301	rs34637584	102463			F15
4809903	PD_Controls 2_KZ_102438-102533	C04	G:G	5.46660	1.07818	rs34637584	102464			J15
4809903	PD_Controls 2_KZ_102438-102533	D04	G:G	5.44480	1.03256	rs34637584	102465			N15
4809903	PD_Controls 2_KZ_102438-102533	E04	G:G	5.40146	1.05626	rs34637584	102466			R15
4809903	PD_Controls 2_KZ_102438-102533	F04	G:G	5.58771	1.22368	rs34637584	102467			V15
4809903	PD_Controls 2_KZ_102438-102533	G04	G:G	5.72921	1.27807	rs34637584	102468			Z15
4809903	PD_Controls 2_KZ_102438-102533	H04	G:G	4.70745	1.09477	rs34637584	102469			AD15
4809903	PD_Controls 2_KZ_102438-102533	A05	G:G	5.56264	1.33768	rs34637584	102470			B19
4809903	PD_Controls 2_KZ_102438-102533	B05	G:G	5.43012	1.19416	rs34637584	102471			F19
4809903	PD_Controls 2_KZ_102438-102533	C05	G:G	5.45539	0.99533	rs34637584	102472			J19
4809903	PD_Controls 2_KZ_102438-102533	D05	G:G	5.27927	1.05927	rs34637584	102473			N19
4809903	PD_Controls 2_KZ_102438-102533	E05	G:G	5.23080	1.00801	rs34637584	102474			R19
4809903	PD_Controls 2_KZ_102438-102533	F05	G:G	5.94043	1.30358	rs34637584	102475			V19
4809903	PD_Controls 2_KZ_102438-102533	G05	G:G	5.64889	1.18219	rs34637584	102476			Z19
4809903	PD_Controls 2_KZ_102438-102533	H05	G:G	4.88433	1.16911	rs34637584	102478			AD19
4809903	PD_Controls 2_KZ_102438-102533	A06	?	6.15509	1.91808	rs34637584	102479			B23
4809903	PD_Controls 2_KZ_102438-102533	B06	G:G	5.63880	1.24304	rs34637584	102480			F23
4809903	PD_Controls 2_KZ_102438-102533	C06	G:G	6.28297	1.28921	rs34637584	102481			J23
4809903	PD_Controls 2_KZ_102438-102533	D06	G:G	5.22629	1.20620	rs34637584	102482			N23
4809903	PD_Controls 2_KZ_102438-102533	E06	G:G	5.56573	1.19559	rs34637584	102483			R23
4809903	PD_Controls 2_KZ_102438-102533	F06	G:G	6.17483	1.06021	rs34637584	102484			V23
4809903	PD_Controls 2_KZ_102438-102533	G06	G:G	5.36568	1.10608	rs34637584	102485			Z23
4809903	PD_Controls 2_KZ_102438-102533	H06	G:G	5.12236	1.48906	rs34637584	102486			AD23
4809903	PD_Controls 2_KZ_102438-102533	A07	G:G	6.33419	1.62198	rs34637584	102487			B27
4809903	PD_Controls 2_KZ_102438-102533	B07	G:G	5.47067	1.34015	rs34637584	102488			F27
4809903	PD_Controls 2_KZ_102438-102533	C07	G:G	5.78565	1.28772	rs34637584	102489			J27
4809903	PD_Controls 2_KZ_102438-102533	D07	G:G	5.83854	1.22356	rs34637584	102490			N27
4809903	PD_Controls 2_KZ_102438-102533	E07	G:G	5.13092	0.93993	rs34637584	102492			R27
4809903	PD_Controls 2_KZ_102438-102533	F07	G:G	5.13478	1.18428	rs34637584	102493			V27
4809903	PD_Controls 2_KZ_102438-102533	G07	G:G	5.50211	1.25924	rs34637584	102494			Z27
4809903	PD_Controls 2_KZ_102438-102533	H07	G:G	5.37278	1.37956	rs34637584	102495			AD27
4809903	PD_Controls 2_KZ_102438-102533	A08	G:G	6.06728	1.25780	rs34637584	102496			B31
4809903	PD_Controls 2_KZ_102438-102533	B08	G:G	5.11462	1.27950	rs34637584	102497			F31
4809903	PD_Controls 2_KZ_102438-102533	C08	G:G	5.00055	1.13660	rs34637584	102498			J31
4809903	PD_Controls 2_KZ_102438-102533	D08	G:G	5.92072	1.19122	rs34637584	102499			N31
4809903	PD_Controls 2_KZ_102438-102533	E08	G:G	6.08660	1.17738	rs34637584	102500			R31
4809903	PD_Controls 2_KZ_102438-102533	F08	G:G	5.49821	1.14086	rs34637584	102501			V31
4809903	PD_Controls 2_KZ_102438-102533	G08	G:G	6.01750	1.34491	rs34637584	102502			Z31
4809903	PD_Controls 2_KZ_102438-102533	H08	G:G	5.49791	1.31938	rs34637584	102503			AD31
4809903	PD_Controls 2_KZ_102438-102533	A09	G:G	5.63838	1.48925	rs34637584	102504			B35
4809903	PD_Controls 2_KZ_102438-102533	B09	G:G	5.85116	1.14693	rs34637584	102505			F35
4809903	PD_Controls 2_KZ_102438-102533	C09	G:G	5.55958	1.04228	rs34637584	102506			J35
4809903	PD_Controls 2_KZ_102438-102533	D09	G:G	5.94082	0.97277	rs34637584	102507			N35
4809903	PD_Controls 2_KZ_102438-102533	E09	G:G	5.31427	1.02999	rs34637584	102508			R35
4809903	PD_Controls 2_KZ_102438-102533	F09	G:G	5.76975	1.02965	rs34637584	102509			V35
4809903	PD_Controls 2_KZ_102438-102533	G09	G:G	5.32947	1.41133	rs34637584	102510			Z35
4809903	PD_Controls 2_KZ_102438-102533	H09	G:G	5.11812	1.40969	rs34637584	102511			AD35
4809903	PD_Controls 2_KZ_102438-102533	A10	G:G	5.31247	1.32797	rs34637584	102512			B39
4809903	PD_Controls 2_KZ_102438-102533	B10	G:G	5.45546	1.13981	rs34637584	102513			F39
4809903	PD_Controls 2_KZ_102438-102533	C10	G:G	5.70381	1.07195	rs34637584	102514			J39
4809903	PD_Controls 2_KZ_102438-102533	D10	G:G	5.52507	1.12168	rs34637584	102515			N39
4809903	PD_Controls 2_KZ_102438-102533	E10	G:G	5.70594	1.11834	rs34637584	102516			R39
4809903	PD_Controls 2_KZ_102438-102533	F10	G:G	5.32745	1.04928	rs34637584	102517			V39
4809903	PD_Controls 2_KZ_102438-102533	G10	G:G	4.98194	1.07310	rs34637584	102518			Z39
4809903	PD_Controls 2_KZ_102438-102533	H10	G:G	4.83016	1.12647	rs34637584	102519			AD39
4809903	PD_Controls 2_KZ_102438-102533	A11	G:G	5.47998	1.65492	rs34637584	102520			B43
4809903	PD_Controls 2_KZ_102438-102533	B11	G:G	5.49071	1.23074	rs34637584	102521			F43
4809903	PD_Controls 2_KZ_102438-102533	C11	G:G	5.45711	1.03608	rs34637584	102522			J43
4809903	PD_Controls 2_KZ_102438-102533	D11	G:G	5.17883	1.37535	rs34637584	102523			N43
4809903	PD_Controls 2_KZ_102438-102533	E11	G:G	5.61125	1.09122	rs34637584	102524			R43
4809903	PD_Controls 2_KZ_102438-102533	F11	G:G	5.33626	1.04685	rs34637584	102525			V43
4809903	PD_Controls 2_KZ_102438-102533	G11	G:G	5.05188	0.79636	rs34637584	102526			Z43
4809903	PD_Controls 2_KZ_102438-102533	H11	G:G	5.45191	1.27834	rs34637584	102527			AD43
4809903	PD_Controls 2_KZ_102438-102533	A12	G:G	5.02394	1.51549	rs34637584	102528			B47
4809903	PD_Controls 2_KZ_102438-102533	B12	G:G	5.21386	1.20791	rs34637584	102529			F47
4809903	PD_Controls 2_KZ_102438-102533	C12	?	5.40035	2.06320	rs34637584	102530			J47
4809903	PD_Controls 2_KZ_102438-102533	D12	G:G	5.53569	1.48823	rs34637584	102531			N47
4809903	PD_Controls 2_KZ_102438-102533	E12	G:G	4.61807	1.08743	rs34637584	102532			R47
4809903	PD_Controls 2_KZ_102438-102533	F12	G:G	5.07135	1.25215	rs34637584	102533			V47
4809903	PD_Controls 2_KZ_102438-102533	G12	NTC	0.23991	0.59748	rs34637584				Z47
4809903	PD_Controls 2_KZ_102438-102533	H12	NTC	0.25422	0.65951	rs34637584				AD47
4809903	PD_Controls 3_KZ_102354-102535	A01	G:G	5.36201	0.95601	rs34637584	102354			D01
4809903	PD_Controls 3_KZ_102354-102535	B01	G:G	5.66143	1.09433	rs34637584	102491			H01
4809903	PD_Controls 3_KZ_102354-102535	C01	G:G	5.04058	0.96435	rs34637584	102340			L01
4809903	PD_Controls 3_KZ_102354-102535	D01	G:G	5.49275	1.05915	rs34637584	102357			P01
4809903	PD_Controls 3_KZ_102354-102535	E01	G:G	4.78369	1.18760	rs34637584	102412			T01
4809903	PD_Controls 3_KZ_102354-102535	F01	G:G	5.08465	1.04732	rs34637584	102419			X01
4809903	PD_Controls 3_KZ_102354-102535	G01	G:G	5.23397	0.83707	rs34637584	102432			AB01
4809903	PD_Controls 3_KZ_102354-102535	H01	G:G	5.80454	1.33313	rs34637584	102477			AF01
4809903	PD_Controls 3_KZ_102354-102535	A02	G:G	5.64234	1.04791	rs34637584	102436			D05
4809903	PD_Controls 3_KZ_102354-102535	B02	G:G	5.46981	0.96406	rs34637584	102437			H05
4809903	PD_Controls 3_KZ_102354-102535	C02	G:G	5.27374	0.88133	rs34637584	102534			L05
4809903	PD_Controls 3_KZ_102354-102535	D02	G:G	4.81583	1.02632	rs34637584	102535			P05
4809903	PD_Controls 3_KZ_102354-102535	G12	NTC	0.22240	0.49627	rs34637584				AB45
4809903	PD_Controls 3_KZ_102354-102535	H12	NTC	0.29757	0.99312	rs34637584				AF45
4809903	Plate 1 PD_98647-98740	A01	?	3.45606	0.42599	rs34778348	98647			C03
4809903	Plate 1 PD_98647-98740	B01	?	0.95180	0.53359	rs34778348	98648			G03
4809903	Plate 1 PD_98647-98740	C01	G:G	4.77758	0.67118	rs34778348	98649			K03
4809903	Plate 1 PD_98647-98740	D01	G:G	5.47776	0.47419	rs34778348	98650			O03
4809903	Plate 1 PD_98647-98740	E01	G:G	4.33826	0.56794	rs34778348	98651			S03
4809903	Plate 1 PD_98647-98740	F01	G:G	5.33226	0.58804	rs34778348	98652			W03
4809903	Plate 1 PD_98647-98740	G01	G:G	5.35147	0.43400	rs34778348	98653			AA03
4809903	Plate 1 PD_98647-98740	H01	G:G	4.03095	0.65365	rs34778348	98654			AE03
4809903	Plate 1 PD_98647-98740	A02	?	1.90302	0.67540	rs34778348	98655			C07
4809903	Plate 1 PD_98647-98740	B02	G:G	5.46438	0.61954	rs34778348	98656			G07
4809903	Plate 1 PD_98647-98740	C02	G:G	5.35064	0.54124	rs34778348	98657			K07
4809903	Plate 1 PD_98647-98740	D02	G:G	5.66344	0.62938	rs34778348	98658			O07
4809903	Plate 1 PD_98647-98740	E02	G:G	5.67153	0.64190	rs34778348	98659			S07
4809903	Plate 1 PD_98647-98740	F02	?	0.64322	0.63649	rs34778348	98660			W07
4809903	Plate 1 PD_98647-98740	G02	G:G	5.96901	0.78696	rs34778348	98661			AA07
4809903	Plate 1 PD_98647-98740	H02	G:G	5.69363	0.68393	rs34778348	98662			AE07
4809903	Plate 1 PD_98647-98740	A03	G:G	5.28087	0.55733	rs34778348	98663			C11
4809903	Plate 1 PD_98647-98740	B03	G:G	5.80254	0.67022	rs34778348	98664			G11
4809903	Plate 1 PD_98647-98740	C03	G:G	6.06374	0.73889	rs34778348	98665			K11
4809903	Plate 1 PD_98647-98740	D03	G:G	6.13551	0.94181	rs34778348	98666			O11
4809903	Plate 1 PD_98647-98740	E03	G:G	5.89470	0.93835	rs34778348	98667			S11
4809903	Plate 1 PD_98647-98740	F03	G:G	5.63533	0.71804	rs34778348	98668			W11
4809903	Plate 1 PD_98647-98740	G03	G:G	6.26541	0.71554	rs34778348	98669			AA11
4809903	Plate 1 PD_98647-98740	H03	G:G	5.64598	0.78856	rs34778348	98670			AE11
4809903	Plate 1 PD_98647-98740	A04	G:G	5.98719	0.64462	rs34778348	98671			C15
4809903	Plate 1 PD_98647-98740	B04	G:G	5.62787	0.74754	rs34778348	98672			G15
4809903	Plate 1 PD_98647-98740	C04	?	0.32402	0.96688	rs34778348	98673			K15
4809903	Plate 1 PD_98647-98740	D04	G:G	5.82405	0.69690	rs34778348	98674			O15
4809903	Plate 1 PD_98647-98740	E04	?	0.99755	0.76750	rs34778348	98675			S15
4809903	Plate 1 PD_98647-98740	F04	?	0.38208	0.76000	rs34778348	98676			W15
4809903	Plate 1 PD_98647-98740	G04	?	1.19959	0.78424	rs34778348	98677			AA15
4809903	Plate 1 PD_98647-98740	H04	?	0.48680	0.77652	rs34778348	98678			AE15
4809903	Plate 1 PD_98647-98740	A05	G:G	6.10141	0.82492	rs34778348	98679			C19
4809903	Plate 1 PD_98647-98740	B05	G:G	5.65851	0.68127	rs34778348	98680			G19
4809903	Plate 1 PD_98647-98740	C05	G:G	5.49394	0.71871	rs34778348	98681			K19
4809903	Plate 1 PD_98647-98740	D05	G:G	5.85500	0.88328	rs34778348	98682			O19
4809903	Plate 1 PD_98647-98740	E05	G:G	6.19141	0.95997	rs34778348	98683			S19
4809903	Plate 1 PD_98647-98740	F05	G:G	5.52392	0.69192	rs34778348	98684			W19
4809903	Plate 1 PD_98647-98740	G05	G:G	5.77320	0.95185	rs34778348	98685			AA19
4809903	Plate 1 PD_98647-98740	H05	G:G	6.00888	0.79851	rs34778348	98686			AE19
4809903	Plate 1 PD_98647-98740	A06	G:G	5.27696	0.86880	rs34778348	98687			C23
4809903	Plate 1 PD_98647-98740	B06	G:G	5.65850	0.74315	rs34778348	98688			G23
4809903	Plate 1 PD_98647-98740	C06	G:G	6.25850	0.82328	rs34778348	98689			K23
4809903	Plate 1 PD_98647-98740	D06	G:G	6.03014	0.85574	rs34778348	98690			O23
4809903	Plate 1 PD_98647-98740	E06	G:G	5.69038	0.91881	rs34778348	98691			S23
4809903	Plate 1 PD_98647-98740	F06	G:G	4.93082	0.65927	rs34778348	98692			W23
4809903	Plate 1 PD_98647-98740	G06	G:G	5.39136	1.06098	rs34778348	98693			AA23
4809903	Plate 1 PD_98647-98740	H06	G:G	5.36655	1.06082	rs34778348	98694			AE23
4809903	Plate 1 PD_98647-98740	A07	G:G	6.03050	1.12668	rs34778348	98695			C27
4809903	Plate 1 PD_98647-98740	B07	G:G	5.91360	0.77337	rs34778348	98696			G27
4809903	Plate 1 PD_98647-98740	C07	G:G	5.81282	0.91337	rs34778348	98697			K27
4809903	Plate 1 PD_98647-98740	D07	G:G	5.93467	0.84081	rs34778348	98698			O27
4809903	Plate 1 PD_98647-98740	E07	G:G	5.45352	0.80671	rs34778348	98699			S27
4809903	Plate 1 PD_98647-98740	F07	G:G	5.15631	0.69137	rs34778348	98700			W27
4809903	Plate 1 PD_98647-98740	G07	G:G	5.29091	0.92198	rs34778348	98701			AA27
4809903	Plate 1 PD_98647-98740	H07	G:G	5.32389	0.73793	rs34778348	98702			AE27
4809903	Plate 1 PD_98647-98740	A08	G:G	5.18820	1.11015	rs34778348	98703			C31
4809903	Plate 1 PD_98647-98740	B08	G:G	5.54570	0.65161	rs34778348	98704			G31
4809903	Plate 1 PD_98647-98740	C08	G:G	5.47768	0.87655	rs34778348	98705			K31
4809903	Plate 1 PD_98647-98740	D08	G:G	5.77518	0.89139	rs34778348	98706			O31
4809903	Plate 1 PD_98647-98740	E08	G:G	5.31533	0.63578	rs34778348	98707			S31
4809903	Plate 1 PD_98647-98740	F08	G:G	5.47537	0.77185	rs34778348	98708			W31
4809903	Plate 1 PD_98647-98740	G08	G:G	5.27511	0.87327	rs34778348	98709			AA31
4809903	Plate 1 PD_98647-98740	H08	G:G	5.50086	0.91163	rs34778348	98710			AE31
4809903	Plate 1 PD_98647-98740	A09	G:G	5.51491	1.09598	rs34778348	98711			C35
4809903	Plate 1 PD_98647-98740	B09	G:G	5.91063	1.03349	rs34778348	98712			G35
4809903	Plate 1 PD_98647-98740	C09	G:G	5.34027	0.63243	rs34778348	98713			K35
4809903	Plate 1 PD_98647-98740	D09	G:G	5.64789	0.50223	rs34778348	98714			O35
4809903	Plate 1 PD_98647-98740	E09	G:G	5.69595	0.83198	rs34778348	98715			S35
4809903	Plate 1 PD_98647-98740	F09	G:G	5.87570	0.96465	rs34778348	98716			W35
4809903	Plate 1 PD_98647-98740	G09	G:G	5.67545	0.99653	rs34778348	98717			AA35
4809903	Plate 1 PD_98647-98740	H09	G:G	5.66067	1.17017	rs34778348	98718			AE35
4809903	Plate 1 PD_98647-98740	A10	G:G	5.88408	1.01881	rs34778348	98719			C39
4809903	Plate 1 PD_98647-98740	B10	G:G	5.37904	0.84538	rs34778348	98720			G39
4809903	Plate 1 PD_98647-98740	C10	G:G	5.79945	0.88266	rs34778348	98721			K39
4809903	Plate 1 PD_98647-98740	D10	G:G	5.60216	0.82763	rs34778348	98722			O39
4809903	Plate 1 PD_98647-98740	E10	G:G	5.50840	0.64829	rs34778348	98723			S39
4809903	Plate 1 PD_98647-98740	F10	G:G	5.71137	0.74003	rs34778348	98724			W39
4809903	Plate 1 PD_98647-98740	G10	G:G	5.73720	0.83137	rs34778348	98725			AA39
4809903	Plate 1 PD_98647-98740	H10	G:G	5.54356	1.10906	rs34778348	98726			AE39
4809903	Plate 1 PD_98647-98740	A11	G:G	6.05623	1.09980	rs34778348	98727			C43
4809903	Plate 1 PD_98647-98740	B11	G:G	6.33014	1.09845	rs34778348	98728			G43
4809903	Plate 1 PD_98647-98740	C11	G:G	5.50879	0.72942	rs34778348	98729			K43
4809903	Plate 1 PD_98647-98740	D11	G:G	5.23056	0.65609	rs34778348	98730			O43
4809903	Plate 1 PD_98647-98740	E11	G:G	5.59991	0.71568	rs34778348	98731			S43
4809903	Plate 1 PD_98647-98740	F11	G:G	5.22338	0.56869	rs34778348	98732			W43
4809903	Plate 1 PD_98647-98740	G11	G:G	5.66061	0.81796	rs34778348	98733			AA43
4809903	Plate 1 PD_98647-98740	H11	G:G	5.42464	0.97501	rs34778348	98734			AE43
4809903	Plate 1 PD_98647-98740	A12	G:G	5.15257	1.22668	rs34778348	98735			C47
4809903	Plate 1 PD_98647-98740	B12	G:G	5.02433	1.01499	rs34778348	98736			G47
4809903	Plate 1 PD_98647-98740	C12	G:G	5.05832	1.13934	rs34778348	98737			K47
4809903	Plate 1 PD_98647-98740	D12	G:G	5.43778	0.83318	rs34778348	98738			O47
4809903	Plate 1 PD_98647-98740	E12	G:G	5.58429	1.05364	rs34778348	98739			S47
4809903	Plate 1 PD_98647-98740	F12	G:G	6.20667	1.00010	rs34778348	98740			W47
4809903	Plate 1 PD_98647-98740	G12	NTC	0.23338	0.46854	rs34778348				AA47
4809903	Plate 1 PD_98647-98740	H12	NTC	0.22994	0.54173	rs34778348				AE47
4809903	Plate 2 PD_102271-98764	A01	G:G	5.07268	0.96458	rs34778348	102171			A02
4809903	Plate 2 PD_102271-98764	B01	G:G	5.38676	0.52833	rs34778348	102172			E02
4809903	Plate 2 PD_102271-98764	C01	G:G	5.80493	0.74631	rs34778348	102173			I02
4809903	Plate 2 PD_102271-98764	D01	G:G	5.89741	0.77712	rs34778348	102174			M02
4809903	Plate 2 PD_102271-98764	E01	G:G	5.62645	0.81812	rs34778348	102175			Q02
4809903	Plate 2 PD_102271-98764	F01	G:G	5.54284	0.62574	rs34778348	102176			U02
4809903	Plate 2 PD_102271-98764	G01	G:G	5.83023	0.73772	rs34778348	102177			Y02
4809903	Plate 2 PD_102271-98764	H01	G:G	5.69655	0.75563	rs34778348	102178			AC02
4809903	Plate 2 PD_102271-98764	A02	G:G	5.85427	1.04344	rs34778348	102179			A06
4809903	Plate 2 PD_102271-98764	B02	G:G	6.22673	0.96046	rs34778348	102180			E06
4809903	Plate 2 PD_102271-98764	C02	G:G	5.46504	0.69174	rs34778348	102181			I06
4809903	Plate 2 PD_102271-98764	D02	G:G	5.95581	0.63937	rs34778348	102182			M06
4809903	Plate 2 PD_102271-98764	E02	G:G	5.37502	0.62468	rs34778348	102183			Q06
4809903	Plate 2 PD_102271-98764	F02	G:G	5.69101	0.65368	rs34778348	102184			U06
4809903	Plate 2 PD_102271-98764	G02	G:G	5.69289	0.76697	rs34778348	102185			Y06
4809903	Plate 2 PD_102271-98764	H02	G:G	5.70066	0.89611	rs34778348	102186			AC06
4809903	Plate 2 PD_102271-98764	A03	G:G	5.69477	0.98600	rs34778348	102187			A10
4809903	Plate 2 PD_102271-98764	B03	G:G	5.21608	0.70155	rs34778348	102189			E10
4809903	Plate 2 PD_102271-98764	C03	G:G	5.30964	0.79949	rs34778348	102190			I10
4809903	Plate 2 PD_102271-98764	D03	G:G	5.71310	0.74044	rs34778348	102191			M10
4809903	Plate 2 PD_102271-98764	E03	G:G	5.50215	0.93709	rs34778348	102192			Q10
4809903	Plate 2 PD_102271-98764	F03	G:G	5.66437	0.63412	rs34778348	102193			U10
4809903	Plate 2 PD_102271-98764	G03	G:G	5.44484	0.74046	rs34778348	102194			Y10
4809903	Plate 2 PD_102271-98764	H03	G:G	5.57632	0.75294	rs34778348	102195			AC10
4809903	Plate 2 PD_102271-98764	A04	G:G	5.98006	1.10724	rs34778348	102196			A14
4809903	Plate 2 PD_102271-98764	B04	G:G	6.72480	1.25107	rs34778348	102197			E14
4809903	Plate 2 PD_102271-98764	C04	A:G	3.61017	3.35518	rs34778348	102198			I14
4809903	Plate 2 PD_102271-98764	D04	G:G	5.78424	0.50996	rs34778348	102199			M14
4809903	Plate 2 PD_102271-98764	E04	G:G	5.90461	0.76796	rs34778348	102200			Q14
4809903	Plate 2 PD_102271-98764	F04	G:G	5.33279	0.70794	rs34778348	102201			U14
4809903	Plate 2 PD_102271-98764	G04	G:G	5.74214	0.72896	rs34778348	102202			Y14
4809903	Plate 2 PD_102271-98764	H04	G:G	5.59213	0.93533	rs34778348	102203			AC14
4809903	Plate 2 PD_102271-98764	A05	G:G	5.60495	0.97009	rs34778348	102204			A18
4809903	Plate 2 PD_102271-98764	B05	G:G	5.71488	1.00550	rs34778348	102205			E18
4809903	Plate 2 PD_102271-98764	C05	G:G	5.80439	0.76445	rs34778348	102206			I18
4809903	Plate 2 PD_102271-98764	D05	G:G	5.66227	0.96807	rs34778348	102207			M18
4809903	Plate 2 PD_102271-98764	E05	G:G	5.83816	0.94021	rs34778348	102208			Q18
4809903	Plate 2 PD_102271-98764	F05	G:G	5.71298	0.74383	rs34778348	102209			U18
4809903	Plate 2 PD_102271-98764	G05	G:G	5.72796	0.73079	rs34778348	102210			Y18
4809903	Plate 2 PD_102271-98764	H05	G:G	4.72516	0.73925	rs34778348	102211			AC18
4809903	Plate 2 PD_102271-98764	A06	G:G	5.80855	1.30589	rs34778348	102212			A22
4809903	Plate 2 PD_102271-98764	B06	G:G	6.01978	0.97869	rs34778348	102213			E22
4809903	Plate 2 PD_102271-98764	C06	G:G	5.61340	0.87494	rs34778348	102214			I22
4809903	Plate 2 PD_102271-98764	D06	G:G	5.34603	0.68454	rs34778348	102215			M22
4809903	Plate 2 PD_102271-98764	E06	G:G	5.86684	0.87146	rs34778348	102216			Q22
4809903	Plate 2 PD_102271-98764	F06	G:G	5.46437	0.85321	rs34778348	102217			U22
4809903	Plate 2 PD_102271-98764	G06	G:G	5.36011	0.75076	rs34778348	102218			Y22
4809903	Plate 2 PD_102271-98764	H06	G:G	5.44540	0.87832	rs34778348	102219			AC22
4809903	Plate 2 PD_102271-98764	A07	G:G	6.11177	1.28318	rs34778348	102221			A26
4809903	Plate 2 PD_102271-98764	B07	G:G	5.66755	0.82679	rs34778348	102222			E26
4809903	Plate 2 PD_102271-98764	C07	G:G	5.40510	0.83080	rs34778348	102223			I26
4809903	Plate 2 PD_102271-98764	D07	G:G	5.38712	0.89913	rs34778348	102224			M26
4809903	Plate 2 PD_102271-98764	E07	G:G	5.58303	0.83412	rs34778348	102225			Q26
4809903	Plate 2 PD_102271-98764	F07	G:G	5.82021	1.01839	rs34778348	102226			U26
4809903	Plate 2 PD_102271-98764	G07	G:G	5.48613	0.94232	rs34778348	102227			Y26
4809903	Plate 2 PD_102271-98764	H07	G:G	6.18855	1.18051	rs34778348	102228			AC26
4809903	Plate 2 PD_102271-98764	A08	G:G	5.30076	1.23798	rs34778348	102229			A30
4809903	Plate 2 PD_102271-98764	B08	G:G	5.42794	0.99601	rs34778348	102230			E30
4809903	Plate 2 PD_102271-98764	C08	G:G	5.95286	0.82919	rs34778348	102231			I30
4809903	Plate 2 PD_102271-98764	D08	G:G	5.55911	0.77794	rs34778348	102232			M30
4809903	Plate 2 PD_102271-98764	E08	G:G	5.39903	0.83742	rs34778348	102233			Q30
4809903	Plate 2 PD_102271-98764	F08	G:G	5.19978	0.80029	rs34778348	102234			U30
4809903	Plate 2 PD_102271-98764	G08	G:G	5.98005	0.97104	rs34778348	102235			Y30
4809903	Plate 2 PD_102271-98764	H08	G:G	5.03564	0.89747	rs34778348	102236			AC30
4809903	Plate 2 PD_102271-98764	A09	G:G	5.39899	1.05678	rs34778348	102237			A34
4809903	Plate 2 PD_102271-98764	B09	G:G	6.20678	1.05312	rs34778348	102238			E34
4809903	Plate 2 PD_102271-98764	C09	G:G	5.39852	0.75743	rs34778348	102239			I34
4809903	Plate 2 PD_102271-98764	D09	G:G	5.76921	0.87417	rs34778348	102241			M34
4809903	Plate 2 PD_102271-98764	E09	G:G	5.52365	0.89737	rs34778348	102242			Q34
4809903	Plate 2 PD_102271-98764	F09	G:G	5.33942	0.76716	rs34778348	102243			U34
4809903	Plate 2 PD_102271-98764	G09	G:G	5.43246	0.91393	rs34778348	102244			Y34
4809903	Plate 2 PD_102271-98764	H09	G:G	6.61025	0.79167	rs34778348	102245			AC34
4809903	Plate 2 PD_102271-98764	A10	G:G	5.96176	1.24138	rs34778348	102246			A38
4809903	Plate 2 PD_102271-98764	B10	G:G	6.33074	0.99281	rs34778348	102247			E38
4809903	Plate 2 PD_102271-98764	C10	G:G	5.64293	0.79902	rs34778348	102248			I38
4809903	Plate 2 PD_102271-98764	D10	G:G	5.74941	0.81977	rs34778348	102249			M38
4809903	Plate 2 PD_102271-98764	E10	G:G	5.76152	0.60236	rs34778348	102250			Q38
4809903	Plate 2 PD_102271-98764	F10	G:G	5.76986	0.80678	rs34778348	102251			U38
4809903	Plate 2 PD_102271-98764	G10	G:G	5.38514	0.83542	rs34778348	102252			Y38
4809903	Plate 2 PD_102271-98764	H10	G:G	6.08741	1.16979	rs34778348	102253			AC38
4809903	Plate 2 PD_102271-98764	A11	G:G	5.49961	1.17002	rs34778348	102254			A42
4809903	Plate 2 PD_102271-98764	B11	G:G	5.43107	1.00130	rs34778348	102256			E42
4809903	Plate 2 PD_102271-98764	C11	G:G	5.75609	0.75018	rs34778348	102258			I42
4809903	Plate 2 PD_102271-98764	D11	G:G	5.76018	0.84962	rs34778348	102259			M42
4809903	Plate 2 PD_102271-98764	E11	G:G	5.97566	0.78142	rs34778348	102260			Q42
4809903	Plate 2 PD_102271-98764	F11	G:G	6.20847	0.72112	rs34778348	102263			U42
4809903	Plate 2 PD_102271-98764	G11	G:G	5.43716	0.84083	rs34778348	102265			Y42
4809903	Plate 2 PD_102271-98764	H11	G:G	5.45099	0.86756	rs34778348	102267			AC42
4809903	Plate 2 PD_102271-98764	A12	G:G	6.21180	1.53982	rs34778348	102269			A46
4809903	Plate 2 PD_102271-98764	B12	A:G	4.03976	3.72443	rs34778348	102270			E46
4809903	Plate 2 PD_102271-98764	C12	G:G	5.23452	0.78723	rs34778348	102240			I46
4809903	Plate 2 PD_102271-98764	D12	G:G	5.64148	0.91719	rs34778348	98762			M46
4809903	Plate 2 PD_102271-98764	E12	G:G	5.87459	0.90122	rs34778348	98763			Q46
4809903	Plate 2 PD_102271-98764	F12	G:G	5.86319	1.05087	rs34778348	98764			U46
4809903	Plate 2 PD_102271-98764	G12	NTC	0.18882	0.62210	rs34778348				Y46
4809903	Plate 2 PD_102271-98764	H12	NTC	0.27513	0.63784	rs34778348				AC46
4809903	Plate 3 PD_102271-98766	A01	G:G	5.82768	1.01256	rs34778348	102271			A04
4809903	Plate 3 PD_102271-98766	B01	G:G	5.21356	0.56806	rs34778348	102272			E04
4809903	Plate 3 PD_102271-98766	C01	G:G	5.49857	0.61631	rs34778348	102273			I04
4809903	Plate 3 PD_102271-98766	D01	G:G	5.04399	0.70289	rs34778348	102275			M04
4809903	Plate 3 PD_102271-98766	E01	G:G	5.13216	0.50798	rs34778348	102276			Q04
4809903	Plate 3 PD_102271-98766	F01	G:G	5.60893	0.77081	rs34778348	102277			U04
4809903	Plate 3 PD_102271-98766	G01	G:G	5.24694	0.74260	rs34778348	102280			Y04
4809903	Plate 3 PD_102271-98766	H01	G:G	5.24060	0.57003	rs34778348	102281			AC04
4809903	Plate 3 PD_102271-98766	A02	G:G	5.87569	1.00761	rs34778348	102282			A08
4809903	Plate 3 PD_102271-98766	B02	G:G	5.76297	0.87807	rs34778348	102284			E08
4809903	Plate 3 PD_102271-98766	C02	G:G	6.06060	0.82765	rs34778348	102285			I08
4809903	Plate 3 PD_102271-98766	D02	G:G	5.90084	0.71920	rs34778348	102286			M08
4809903	Plate 3 PD_102271-98766	E02	G:G	6.00321	0.74270	rs34778348	102287			Q08
4809903	Plate 3 PD_102271-98766	F02	G:G	5.11886	0.73349	rs34778348	102288			U08
4809903	Plate 3 PD_102271-98766	G02	G:G	5.92725	0.87112	rs34778348	102289			Y08
4809903	Plate 3 PD_102271-98766	H02	G:G	5.12540	0.76179	rs34778348	102291			AC08
4809903	Plate 3 PD_102271-98766	A03	?	5.11881	2.38883	rs34778348	102292			A12
4809903	Plate 3 PD_102271-98766	B03	G:G	5.98583	0.82068	rs34778348	102293			E12
4809903	Plate 3 PD_102271-98766	C03	G:G	5.79040	0.70688	rs34778348	102294			I12
4809903	Plate 3 PD_102271-98766	D03	G:G	6.03815	0.88538	rs34778348	102295			M12
4809903	Plate 3 PD_102271-98766	E03	?	4.04236	2.39718	rs34778348	102296			Q12
4809903	Plate 3 PD_102271-98766	F03	?	0.53582	0.70226	rs34778348	102297			U12
4809903	Plate 3 PD_102271-98766	G03	G:G	5.33969	0.68725	rs34778348	102298			Y12
4809903	Plate 3 PD_102271-98766	H03	G:G	5.28321	0.71298	rs34778348	102300			AC12
4809903	Plate 3 PD_102271-98766	A04	G:G	6.18617	1.20622	rs34778348	102301			A16
4809903	Plate 3 PD_102271-98766	B04	G:G	5.50373	0.98031	rs34778348	102302			E16
4809903	Plate 3 PD_102271-98766	C04	G:G	5.69476	0.89189	rs34778348	102304			I16
4809903	Plate 3 PD_102271-98766	D04	G:G	5.78547	0.98863	rs34778348	102306			M16
4809903	Plate 3 PD_102271-98766	E04	G:G	5.16115	0.75036	rs34778348	102308			Q16
4809903	Plate 3 PD_102271-98766	F04	G:G	5.81590	0.82113	rs34778348	102310			U16
4809903	Plate 3 PD_102271-98766	G04	G:G	5.14456	0.75009	rs34778348	102311			Y16
4809903	Plate 3 PD_102271-98766	H04	G:G	5.15867	0.70899	rs34778348	102312			AC16
4809903	Plate 3 PD_102271-98766	A05	G:G	6.11855	1.19095	rs34778348	102313			A20
4809903	Plate 3 PD_102271-98766	B05	G:G	5.91601	0.80434	rs34778348	102315			E20
4809903	Plate 3 PD_102271-98766	C05	G:G	5.23648	0.70485	rs34778348	102316			I20
4809903	Plate 3 PD_102271-98766	D05	G:G	5.25607	0.72505	rs34778348	102317			M20
4809903	Plate 3 PD_102271-98766	E05	G:G	6.38805	0.94254	rs34778348	102318			Q20
4809903	Plate 3 PD_102271-98766	F05	G:G	5.31540	0.54912	rs34778348	102319			U20
4809903	Plate 3 PD_102271-98766	G05	G:G	5.54020	0.82497	rs34778348	102320			Y20
4809903	Plate 3 PD_102271-98766	H05	G:G	6.14357	0.87861	rs34778348	102321			AC20
4809903	Plate 3 PD_102271-98766	A06	G:G	5.62325	1.24787	rs34778348	102322			A24
4809903	Plate 3 PD_102271-98766	B06	G:G	5.90930	0.84128	rs34778348	102188			E24
4809903	Plate 3 PD_102271-98766	C06	?	0.70653	0.93239	rs34778348	102324			I24
4809903	Plate 3 PD_102271-98766	D06	G:G	5.86787	0.87595	rs34778348	102325			M24
4809903	Plate 3 PD_102271-98766	E06	G:G	6.31122	0.95210	rs34778348	102326			Q24
4809903	Plate 3 PD_102271-98766	F06	G:G	5.21360	0.76212	rs34778348	102327			U24
4809903	Plate 3 PD_102271-98766	G06	G:G	5.46591	0.83732	rs34778348	102328			Y24
4809903	Plate 3 PD_102271-98766	H06	G:G	4.86858	0.95264	rs34778348	102329			AC24
4809903	Plate 3 PD_102271-98766	A07	G:G	6.26927	1.23167	rs34778348	102330			A28
4809903	Plate 3 PD_102271-98766	B07	G:G	6.07242	0.84816	rs34778348	102331			E28
4809903	Plate 3 PD_102271-98766	C07	G:G	5.82180	0.94782	rs34778348	102332			I28
4809903	Plate 3 PD_102271-98766	D07	G:G	5.70205	0.78539	rs34778348	102333			M28
4809903	Plate 3 PD_102271-98766	E07	G:G	5.60500	0.66615	rs34778348	102334			Q28
4809903	Plate 3 PD_102271-98766	F07	G:G	5.75842	0.75667	rs34778348	102335			U28
4809903	Plate 3 PD_102271-98766	G07	G:G	5.67889	0.93797	rs34778348	98760			Y28
4809903	Plate 3 PD_102271-98766	H07	G:G	5.22419	0.90178	rs34778348	98761			AC28
4809903	Plate 3 PD_102271-98766	A08	G:G	5.76528	1.24973	rs34778348	98765			A32
4809903	Plate 3 PD_102271-98766	B08	G:G	5.62035	0.96302	rs34778348	98766			E32
4809903	Plate 3 PD_102271-98766	G12	NTC	0.23379	0.60637	rs34778348				Y48
4809903	Plate 3 PD_102271-98766	H12	NTC	0.23503	0.65920	rs34778348				AC48
4809903	PD_Controls 1_KZ_102336-102435	A01	G:G	5.78556	1.08916	rs34778348	102336			A01
4809903	PD_Controls 1_KZ_102336-102435	B01	G:G	5.68443	0.72881	rs34778348	102345			E01
4809903	PD_Controls 1_KZ_102336-102435	C01	G:G	5.56543	0.73756	rs34778348	102337			I01
4809903	PD_Controls 1_KZ_102336-102435	D01	G:G	5.33580	0.54260	rs34778348	102339			M01
4809903	PD_Controls 1_KZ_102336-102435	E01	G:G	6.47964	0.76011	rs34778348	102341			Q01
4809903	PD_Controls 1_KZ_102336-102435	F01	G:G	5.26267	0.66738	rs34778348	102342			U01
4809903	PD_Controls 1_KZ_102336-102435	G01	G:G	5.86702	0.66296	rs34778348	102343			Y01
4809903	PD_Controls 1_KZ_102336-102435	H01	G:G	5.91365	0.60502	rs34778348	102344			AC01
4809903	PD_Controls 1_KZ_102336-102435	A02	G:G	5.52384	0.88670	rs34778348	102338			A05
4809903	PD_Controls 1_KZ_102336-102435	B02	G:G	5.41169	0.64925	rs34778348	102346			E05
4809903	PD_Controls 1_KZ_102336-102435	C02	G:G	5.64540	0.69388	rs34778348	102347			I05
4809903	PD_Controls 1_KZ_102336-102435	D02	G:G	5.73987	0.64839	rs34778348	102348			M05
4809903	PD_Controls 1_KZ_102336-102435	E02	A:G	3.45132	3.04070	rs34778348	102349			Q05
4809903	PD_Controls 1_KZ_102336-102435	F02	G:G	5.43582	0.53107	rs34778348	102350			U05
4809903	PD_Controls 1_KZ_102336-102435	G02	G:G	5.68347	0.71128	rs34778348	102351			Y05
4809903	PD_Controls 1_KZ_102336-102435	H02	G:G	5.19884	0.77215	rs34778348	102352			AC05
4809903	PD_Controls 1_KZ_102336-102435	A03	G:G	5.79185	1.07088	rs34778348	102353			A09
4809903	PD_Controls 1_KZ_102336-102435	B03	G:G	6.01810	0.88726	rs34778348	102355			E09
4809903	PD_Controls 1_KZ_102336-102435	C03	G:G	5.49636	0.79138	rs34778348	102356			I09
4809903	PD_Controls 1_KZ_102336-102435	D03	G:G	5.25282	0.86991	rs34778348	102358			M09
4809903	PD_Controls 1_KZ_102336-102435	E03	G:G	6.27295	0.97366	rs34778348	102359			Q09
4809903	PD_Controls 1_KZ_102336-102435	F03	G:G	6.30748	0.93405	rs34778348	102360			U09
4809903	PD_Controls 1_KZ_102336-102435	G03	G:G	5.87750	0.69022	rs34778348	102361			Y09
4809903	PD_Controls 1_KZ_102336-102435	H03	G:G	5.51915	0.74463	rs34778348	102362			AC09
4809903	PD_Controls 1_KZ_102336-102435	A04	G:G	5.81901	1.27910	rs34778348	102363			A13
4809903	PD_Controls 1_KZ_102336-102435	B04	G:G	5.93056	0.91319	rs34778348	102364			E13
4809903	PD_Controls 1_KZ_102336-102435	C04	G:G	5.28610	0.79901	rs34778348	102365			I13
4809903	PD_Controls 1_KZ_102336-102435	D04	G:G	5.96031	0.74923	rs34778348	102366			M13
4809903	PD_Controls 1_KZ_102336-102435	E04	G:G	5.43349	0.84130	rs34778348	102367			Q13
4809903	PD_Controls 1_KZ_102336-102435	F04	G:G	5.43437	0.74032	rs34778348	102368			U13
4809903	PD_Controls 1_KZ_102336-102435	G04	G:G	6.39990	0.80028	rs34778348	102369			Y13
4809903	PD_Controls 1_KZ_102336-102435	H04	G:G	5.35464	0.89510	rs34778348	102370			AC13
4809903	PD_Controls 1_KZ_102336-102435	A05	G:G	6.13730	1.33461	rs34778348	102371			A17
4809903	PD_Controls 1_KZ_102336-102435	B05	G:G	5.62285	0.87682	rs34778348	102372			E17
4809903	PD_Controls 1_KZ_102336-102435	C05	G:G	5.55764	0.74698	rs34778348	102373			I17
4809903	PD_Controls 1_KZ_102336-102435	D05	G:G	5.55707	0.81333	rs34778348	102374			M17
4809903	PD_Controls 1_KZ_102336-102435	E05	G:G	5.37770	0.77525	rs34778348	102375			Q17
4809903	PD_Controls 1_KZ_102336-102435	F05	G:G	5.89892	0.82753	rs34778348	102376			U17
4809903	PD_Controls 1_KZ_102336-102435	G05	G:G	5.71258	1.01677	rs34778348	102377			Y17
4809903	PD_Controls 1_KZ_102336-102435	H05	G:G	5.35234	0.80897	rs34778348	102378			AC17
4809903	PD_Controls 1_KZ_102336-102435	A06	G:G	5.52690	1.32053	rs34778348	102379			A21
4809903	PD_Controls 1_KZ_102336-102435	B06	G:G	5.96683	0.91512	rs34778348	102380			E21
4809903	PD_Controls 1_KZ_102336-102435	C06	G:G	5.73113	0.82402	rs34778348	102381			I21
4809903	PD_Controls 1_KZ_102336-102435	D06	G:G	5.28713	0.91422	rs34778348	102382			M21
4809903	PD_Controls 1_KZ_102336-102435	E06	G:G	5.39198	0.73085	rs34778348	102383			Q21
4809903	PD_Controls 1_KZ_102336-102435	F06	G:G	5.99920	0.74937	rs34778348	102384			U21
4809903	PD_Controls 1_KZ_102336-102435	G06	G:G	5.71966	0.88316	rs34778348	102385			Y21
4809903	PD_Controls 1_KZ_102336-102435	H06	G:G	5.79179	1.04296	rs34778348	102386			AC21
4809903	PD_Controls 1_KZ_102336-102435	A07	G:G	5.82556	1.26201	rs34778348	102387			A25
4809903	PD_Controls 1_KZ_102336-102435	B07	G:G	5.58047	0.73579	rs34778348	102388			E25
4809903	PD_Controls 1_KZ_102336-102435	C07	G:G	5.36071	0.85474	rs34778348	102389			I25
4809903	PD_Controls 1_KZ_102336-102435	D07	G:G	5.62935	0.74207	rs34778348	102390			M25
4809903	PD_Controls 1_KZ_102336-102435	E07	G:G	6.07508	0.79065	rs34778348	102391			Q25
4809903	PD_Controls 1_KZ_102336-102435	F07	G:G	5.93069	0.76736	rs34778348	102392			U25
4809903	PD_Controls 1_KZ_102336-102435	G07	G:G	5.30412	0.93248	rs34778348	102393			Y25
4809903	PD_Controls 1_KZ_102336-102435	H07	G:G	6.00357	1.22409	rs34778348	102394			AC25
4809903	PD_Controls 1_KZ_102336-102435	A08	G:G	5.98831	0.93817	rs34778348	102395			A29
4809903	PD_Controls 1_KZ_102336-102435	B08	G:G	6.17020	1.02878	rs34778348	102396			E29
4809903	PD_Controls 1_KZ_102336-102435	C08	G:G	6.12120	0.91604	rs34778348	102397			I29
4809903	PD_Controls 1_KZ_102336-102435	D08	G:G	5.49303	0.86626	rs34778348	102398			M29
4809903	PD_Controls 1_KZ_102336-102435	E08	G:G	5.46230	0.49086	rs34778348	102399			Q29
4809903	PD_Controls 1_KZ_102336-102435	F08	G:G	5.24714	0.79208	rs34778348	102400			U29
4809903	PD_Controls 1_KZ_102336-102435	G08	G:G	5.44097	0.64013	rs34778348	102401			Y29
4809903	PD_Controls 1_KZ_102336-102435	H08	G:G	4.90641	0.91986	rs34778348	102402			AC29
4809903	PD_Controls 1_KZ_102336-102435	A09	G:G	5.78685	1.07481	rs34778348	102403			A33
4809903	PD_Controls 1_KZ_102336-102435	B09	G:G	5.66733	0.65514	rs34778348	102413			E33
4809903	PD_Controls 1_KZ_102336-102435	C09	G:G	5.23107	0.54968	rs34778348	102405			I33
4809903	PD_Controls 1_KZ_102336-102435	D09	G:G	5.45205	0.65821	rs34778348	102406			M33
4809903	PD_Controls 1_KZ_102336-102435	E09	?	5.14957	1.68538	rs34778348	102407			Q33
4809903	PD_Controls 1_KZ_102336-102435	F09	G:G	5.84669	0.67450	rs34778348	102408			U33
4809903	PD_Controls 1_KZ_102336-102435	G09	G:G	5.19426	0.73320	rs34778348	102409			Y33
4809903	PD_Controls 1_KZ_102336-102435	H09	G:G	5.59779	0.76842	rs34778348	102410			AC33
4809903	PD_Controls 1_KZ_102336-102435	A10	G:G	5.36159	0.87003	rs34778348	102411			A37
4809903	PD_Controls 1_KZ_102336-102435	B10	G:G	5.96397	1.11016	rs34778348	102404			E37
4809903	PD_Controls 1_KZ_102336-102435	C10	G:G	6.32433	0.94468	rs34778348	102414			I37
4809903	PD_Controls 1_KZ_102336-102435	D10	G:G	5.88972	0.78212	rs34778348	102415			M37
4809903	PD_Controls 1_KZ_102336-102435	E10	G:G	5.51127	0.71349	rs34778348	102416			Q37
4809903	PD_Controls 1_KZ_102336-102435	F10	G:G	6.60702	0.77184	rs34778348	102417			U37
4809903	PD_Controls 1_KZ_102336-102435	G10	A:G	3.16989	3.11363	rs34778348	102418			Y37
4809903	PD_Controls 1_KZ_102336-102435	H10	G:G	5.11845	0.93283	rs34778348	102420			AC37
4809903	PD_Controls 1_KZ_102336-102435	A11	G:G	5.66866	1.16230	rs34778348	102421			A41
4809903	PD_Controls 1_KZ_102336-102435	B11	G:G	5.84670	0.97051	rs34778348	102422			E41
4809903	PD_Controls 1_KZ_102336-102435	C11	G:G	5.44933	0.77132	rs34778348	102423			I41
4809903	PD_Controls 1_KZ_102336-102435	D11	?	0.32199	0.47742	rs34778348	102424			M41
4809903	PD_Controls 1_KZ_102336-102435	E11	G:G	4.39200	0.84505	rs34778348	102425			Q41
4809903	PD_Controls 1_KZ_102336-102435	F11	G:G	5.97737	0.96825	rs34778348	102426			U41
4809903	PD_Controls 1_KZ_102336-102435	G11	G:G	6.32053	0.87161	rs34778348	102427			Y41
4809903	PD_Controls 1_KZ_102336-102435	H11	G:G	5.63029	1.04804	rs34778348	102428			AC41
4809903	PD_Controls 1_KZ_102336-102435	A12	G:G	4.99156	0.88168	rs34778348	102429			A45
4809903	PD_Controls 1_KZ_102336-102435	B12	G:G	5.56256	0.92527	rs34778348	102430			E45
4809903	PD_Controls 1_KZ_102336-102435	C12	G:G	5.69848	0.59089	rs34778348	102431			I45
4809903	PD_Controls 1_KZ_102336-102435	D12	G:G	5.36243	0.73827	rs34778348	102433			M45
4809903	PD_Controls 1_KZ_102336-102435	E12	G:G	6.07464	0.78400	rs34778348	102434			Q45
4809903	PD_Controls 1_KZ_102336-102435	F12	G:G	5.53610	0.86799	rs34778348	102435			U45
4809903	PD_Controls 1_KZ_102336-102435	G12	NTC	0.11179	0.62486	rs34778348				Y45
4809903	PD_Controls 1_KZ_102336-102435	H12	NTC	0.12030	0.69420	rs34778348				AC45
4809903	PD_Controls 2_KZ_102438-102533	A01	G:G	5.07209	0.96192	rs34778348	102438			A03
4809903	PD_Controls 2_KZ_102438-102533	B01	G:G	5.58970	0.76241	rs34778348	102439			E03
4809903	PD_Controls 2_KZ_102438-102533	C01	G:G	5.55362	0.72615	rs34778348	102440			I03
4809903	PD_Controls 2_KZ_102438-102533	D01	G:G	5.61694	0.91692	rs34778348	102441			M03
4809903	PD_Controls 2_KZ_102438-102533	E01	G:G	5.76788	0.59577	rs34778348	102442			Q03
4809903	PD_Controls 2_KZ_102438-102533	F01	?	0.40471	0.61384	rs34778348	102443			U03
4809903	PD_Controls 2_KZ_102438-102533	G01	G:G	5.01365	0.61703	rs34778348	102444			Y03
4809903	PD_Controls 2_KZ_102438-102533	H01	G:G	5.89693	0.75349	rs34778348	102445			AC03
4809903	PD_Controls 2_KZ_102438-102533	A02	G:G	5.28958	0.88485	rs34778348	102446			A07
4809903	PD_Controls 2_KZ_102438-102533	B02	G:G	5.65603	0.68478	rs34778348	102447			E07
4809903	PD_Controls 2_KZ_102438-102533	C02	G:G	5.68742	0.80937	rs34778348	102448			I07
4809903	PD_Controls 2_KZ_102438-102533	D02	G:G	5.53585	0.66397	rs34778348	102449			M07
4809903	PD_Controls 2_KZ_102438-102533	E02	G:G	5.87092	0.68363	rs34778348	102450			Q07
4809903	PD_Controls 2_KZ_102438-102533	F02	G:G	5.82266	0.71025	rs34778348	102451			U07
4809903	PD_Controls 2_KZ_102438-102533	G02	G:G	5.20929	0.73871	rs34778348	102452			Y07
4809903	PD_Controls 2_KZ_102438-102533	H02	G:G	5.82094	0.58239	rs34778348	102453			AC07
4809903	PD_Controls 2_KZ_102438-102533	A03	G:G	5.73494	1.07031	rs34778348	102454			A11
4809903	PD_Controls 2_KZ_102438-102533	B03	G:G	5.70366	0.70490	rs34778348	102455			E11
4809903	PD_Controls 2_KZ_102438-102533	C03	G:G	5.18157	0.77993	rs34778348	102456			I11
4809903	PD_Controls 2_KZ_102438-102533	D03	G:G	6.06330	0.91238	rs34778348	102457			M11
4809903	PD_Controls 2_KZ_102438-102533	E03	G:G	6.08998	0.63044	rs34778348	102458			Q11
4809903	PD_Controls 2_KZ_102438-102533	F03	G:G	5.53038	0.76345	rs34778348	102459			U11
4809903	PD_Controls 2_KZ_102438-102533	G03	G:G	5.52050	0.89558	rs34778348	102460			Y11
4809903	PD_Controls 2_KZ_102438-102533	H03	G:G	6.16241	1.00538	rs34778348	102461			AC11
4809903	PD_Controls 2_KZ_102438-102533	A04	G:G	5.40162	1.09414	rs34778348	102462			A15
4809903	PD_Controls 2_KZ_102438-102533	B04	G:G	5.59551	0.95122	rs34778348	102463			E15
4809903	PD_Controls 2_KZ_102438-102533	C04	G:G	5.78257	0.79028	rs34778348	102464			I15
4809903	PD_Controls 2_KZ_102438-102533	D04	G:G	5.20818	0.74678	rs34778348	102465			M15
4809903	PD_Controls 2_KZ_102438-102533	E04	G:G	5.54850	0.81587	rs34778348	102466			Q15
4809903	PD_Controls 2_KZ_102438-102533	F04	G:G	5.51557	0.79327	rs34778348	102467			U15
4809903	PD_Controls 2_KZ_102438-102533	G04	G:G	5.83995	0.68113	rs34778348	102468			Y15
4809903	PD_Controls 2_KZ_102438-102533	H04	G:G	5.08089	0.79446	rs34778348	102469			AC15
4809903	PD_Controls 2_KZ_102438-102533	A05	G:G	5.65704	1.05578	rs34778348	102470			A19
4809903	PD_Controls 2_KZ_102438-102533	B05	G:G	5.62232	0.97522	rs34778348	102471			E19
4809903	PD_Controls 2_KZ_102438-102533	C05	G:G	5.72206	0.89583	rs34778348	102472			I19
4809903	PD_Controls 2_KZ_102438-102533	D05	G:G	5.85471	0.89400	rs34778348	102473			M19
4809903	PD_Controls 2_KZ_102438-102533	E05	G:G	5.87306	0.74724	rs34778348	102474			Q19
4809903	PD_Controls 2_KZ_102438-102533	F05	G:G	5.81186	0.84289	rs34778348	102475			U19
4809903	PD_Controls 2_KZ_102438-102533	G05	G:G	4.46058	0.98538	rs34778348	102476			Y19
4809903	PD_Controls 2_KZ_102438-102533	H05	G:G	5.27912	0.75072	rs34778348	102478			AC19
4809903	PD_Controls 2_KZ_102438-102533	A06	G:G	5.66008	1.20323	rs34778348	102479			A23
4809903	PD_Controls 2_KZ_102438-102533	B06	G:G	5.59908	0.77472	rs34778348	102480			E23
4809903	PD_Controls 2_KZ_102438-102533	C06	G:G	5.51063	0.85457	rs34778348	102481			I23
4809903	PD_Controls 2_KZ_102438-102533	D06	G:G	5.76631	0.82731	rs34778348	102482			M23
4809903	PD_Controls 2_KZ_102438-102533	E06	G:G	5.32026	0.74459	rs34778348	102483			Q23
4809903	PD_Controls 2_KZ_102438-102533	F06	G:G	6.32070	0.95787	rs34778348	102484			U23
4809903	PD_Controls 2_KZ_102438-102533	G06	G:G	6.12305	0.79194	rs34778348	102485			Y23
4809903	PD_Controls 2_KZ_102438-102533	H06	G:G	5.07036	0.76292	rs34778348	102486			AC23
4809903	PD_Controls 2_KZ_102438-102533	A07	G:G	5.69486	1.21290	rs34778348	102487			A27
4809903	PD_Controls 2_KZ_102438-102533	B07	G:G	6.04151	1.00203	rs34778348	102488			E27
4809903	PD_Controls 2_KZ_102438-102533	C07	G:G	5.38446	0.77983	rs34778348	102489			I27
4809903	PD_Controls 2_KZ_102438-102533	D07	G:G	5.76145	0.83021	rs34778348	102490			M27
4809903	PD_Controls 2_KZ_102438-102533	E07	G:G	5.70154	0.98871	rs34778348	102492			Q27
4809903	PD_Controls 2_KZ_102438-102533	F07	G:G	5.02828	0.71393	rs34778348	102493			U27
4809903	PD_Controls 2_KZ_102438-102533	G07	G:G	6.12046	1.03794	rs34778348	102494			Y27
4809903	PD_Controls 2_KZ_102438-102533	H07	G:G	5.22896	1.03665	rs34778348	102495			AC27
4809903	PD_Controls 2_KZ_102438-102533	A08	G:G	5.67947	1.19575	rs34778348	102496			A31
4809903	PD_Controls 2_KZ_102438-102533	B08	G:G	5.93678	0.78663	rs34778348	102497			E31
4809903	PD_Controls 2_KZ_102438-102533	C08	G:G	6.10489	0.56061	rs34778348	102498			I31
4809903	PD_Controls 2_KZ_102438-102533	D08	G:G	6.03402	0.63237	rs34778348	102499			M31
4809903	PD_Controls 2_KZ_102438-102533	E08	G:G	5.23899	0.77844	rs34778348	102500			Q31
4809903	PD_Controls 2_KZ_102438-102533	F08	G:G	5.29794	0.75768	rs34778348	102501			U31
4809903	PD_Controls 2_KZ_102438-102533	G08	G:G	5.80757	0.84059	rs34778348	102502			Y31
4809903	PD_Controls 2_KZ_102438-102533	H08	G:G	5.23225	0.64984	rs34778348	102503			AC31
4809903	PD_Controls 2_KZ_102438-102533	A09	G:G	6.15891	1.12325	rs34778348	102504			A35
4809903	PD_Controls 2_KZ_102438-102533	B09	G:G	6.07246	0.62786	rs34778348	102505			E35
4809903	PD_Controls 2_KZ_102438-102533	C09	G:G	5.76725	0.92243	rs34778348	102506			I35
4809903	PD_Controls 2_KZ_102438-102533	D09	G:G	5.84517	0.75396	rs34778348	102507			M35
4809903	PD_Controls 2_KZ_102438-102533	E09	?	3.32459	0.47077	rs34778348	102508			Q35
4809903	PD_Controls 2_KZ_102438-102533	F09	G:G	5.62671	0.84280	rs34778348	102509			U35
4809903	PD_Controls 2_KZ_102438-102533	G09	G:G	6.40025	1.13680	rs34778348	102510			Y35
4809903	PD_Controls 2_KZ_102438-102533	H09	G:G	5.99365	0.83445	rs34778348	102511			AC35
4809903	PD_Controls 2_KZ_102438-102533	A10	G:G	5.40316	1.12136	rs34778348	102512			A39
4809903	PD_Controls 2_KZ_102438-102533	B10	G:G	5.84488	0.87598	rs34778348	102513			E39
4809903	PD_Controls 2_KZ_102438-102533	C10	G:G	5.74677	0.78689	rs34778348	102514			I39
4809903	PD_Controls 2_KZ_102438-102533	D10	G:G	5.67992	0.66103	rs34778348	102515			M39
4809903	PD_Controls 2_KZ_102438-102533	E10	G:G	6.35355	0.92618	rs34778348	102516			Q39
4809903	PD_Controls 2_KZ_102438-102533	F10	G:G	6.21513	0.99795	rs34778348	102517			U39
4809903	PD_Controls 2_KZ_102438-102533	G10	G:G	5.49362	0.71760	rs34778348	102518			Y39
4809903	PD_Controls 2_KZ_102438-102533	H10	G:G	5.25589	0.93448	rs34778348	102519			AC39
4809903	PD_Controls 2_KZ_102438-102533	A11	G:G	5.97121	1.11030	rs34778348	102520			A43
4809903	PD_Controls 2_KZ_102438-102533	B11	G:G	5.72901	0.76051	rs34778348	102521			E43
4809903	PD_Controls 2_KZ_102438-102533	C11	G:G	5.42894	0.70387	rs34778348	102522			I43
4809903	PD_Controls 2_KZ_102438-102533	D11	G:G	5.32189	0.68037	rs34778348	102523			M43
4809903	PD_Controls 2_KZ_102438-102533	E11	G:G	5.89008	0.68377	rs34778348	102524			Q43
4809903	PD_Controls 2_KZ_102438-102533	F11	G:G	5.44949	0.79034	rs34778348	102525			U43
4809903	PD_Controls 2_KZ_102438-102533	G11	G:G	5.16437	0.50183	rs34778348	102526			Y43
4809903	PD_Controls 2_KZ_102438-102533	H11	G:G	5.50517	0.74475	rs34778348	102527			AC43
4809903	PD_Controls 2_KZ_102438-102533	A12	G:G	5.49689	1.21536	rs34778348	102528			A47
4809903	PD_Controls 2_KZ_102438-102533	B12	G:G	5.55013	0.99903	rs34778348	102529			E47
4809903	PD_Controls 2_KZ_102438-102533	C12	G:G	5.94640	0.79472	rs34778348	102530			I47
4809903	PD_Controls 2_KZ_102438-102533	D12	G:G	5.66284	0.93818	rs34778348	102531			M47
4809903	PD_Controls 2_KZ_102438-102533	E12	G:G	5.44626	0.96637	rs34778348	102532			Q47
4809903	PD_Controls 2_KZ_102438-102533	F12	G:G	5.70126	0.89904	rs34778348	102533			U47
4809903	PD_Controls 2_KZ_102438-102533	G12	NTC	0.13621	0.54893	rs34778348				Y47
4809903	PD_Controls 2_KZ_102438-102533	H12	NTC	0.25092	0.67714	rs34778348				AC47
4809903	PD_Controls 3_KZ_102354-102535	A01	G:G	6.18062	0.73914	rs34778348	102354			C01
4809903	PD_Controls 3_KZ_102354-102535	B01	G:G	5.32676	0.58912	rs34778348	102491			G01
4809903	PD_Controls 3_KZ_102354-102535	C01	G:G	5.00147	0.57208	rs34778348	102340			K01
4809903	PD_Controls 3_KZ_102354-102535	D01	G:G	5.38926	0.69651	rs34778348	102357			O01
4809903	PD_Controls 3_KZ_102354-102535	E01	G:G	5.64276	1.30661	rs34778348	102412			S01
4809903	PD_Controls 3_KZ_102354-102535	F01	G:G	5.69507	0.76244	rs34778348	102419			W01
4809903	PD_Controls 3_KZ_102354-102535	G01	G:G	5.17892	0.59397	rs34778348	102432			AA01
4809903	PD_Controls 3_KZ_102354-102535	H01	G:G	5.08096	0.68952	rs34778348	102477			AE01
4809903	PD_Controls 3_KZ_102354-102535	A02	G:G	4.83186	0.69552	rs34778348	102436			C05
4809903	PD_Controls 3_KZ_102354-102535	B02	G:G	5.90685	0.80013	rs34778348	102437			G05
4809903	PD_Controls 3_KZ_102354-102535	C02	G:G	4.78655	0.61951	rs34778348	102534			K05
4809903	PD_Controls 3_KZ_102354-102535	D02	G:G	5.98097	0.71778	rs34778348	102535			O05
4809903	PD_Controls 3_KZ_102354-102535	G12	NTC	0.15595	0.54759	rs34778348				AA45
4809903	PD_Controls 3_KZ_102354-102535	H12	NTC	0.20824	0.36904	rs34778348				AE45
4893656	Plate 1 PD_98647-98740	A01	G:G	2.06000	1.25343	rs33949390	98647			C03
4893656	Plate 1 PD_98647-98740	A01	G:G	1.02801	1.02886	rs33949390	98647			D03
4893656	Plate 1 PD_98647-98740	B01	G:G	1.45116	1.10297	rs33949390	98648			G03
4893656	Plate 1 PD_98647-98740	B01	G:G	1.10611	1.16117	rs33949390	98648			H03
4893656	Plate 1 PD_98647-98740	C01	G:G	2.50143	1.29331	rs33949390	98649			K03
4893656	Plate 1 PD_98647-98740	C01	G:G	1.32917	0.91320	rs33949390	98649			L03
4893656	Plate 1 PD_98647-98740	D01	G:G	2.32627	1.32454	rs33949390	98650			O03
4893656	Plate 1 PD_98647-98740	D01	G:G	2.30776	1.10253	rs33949390	98650			P03
4893656	Plate 1 PD_98647-98740	E01	?	0.19336	1.14363	rs33949390	98651			S03
4893656	Plate 1 PD_98647-98740	E01	?	0.18115	1.04810	rs33949390	98651			T03
4893656	Plate 1 PD_98647-98740	F01	G:G	2.32249	1.19992	rs33949390	98652			W03
4893656	Plate 1 PD_98647-98740	F01	G:G	2.18623	1.05745	rs33949390	98652			X03
4893656	Plate 1 PD_98647-98740	G01	G:G	2.62424	1.29481	rs33949390	98653			AA03
4893656	Plate 1 PD_98647-98740	G01	G:G	2.57814	1.09702	rs33949390	98653			AB03
4893656	Plate 1 PD_98647-98740	H01	?	0.30292	1.13115	rs33949390	98654			AE03
4893656	Plate 1 PD_98647-98740	H01	?	0.20218	1.42884	rs33949390	98654			AF03
4893656	Plate 1 PD_98647-98740	A02	?	0.13691	1.38160	rs33949390	98655			C07
4893656	Plate 1 PD_98647-98740	A02	?	0.25225	1.01752	rs33949390	98655			D07
4893656	Plate 1 PD_98647-98740	B02	?	0.14204	1.07454	rs33949390	98656			G07
4893656	Plate 1 PD_98647-98740	B02	?	0.18601	1.25052	rs33949390	98656			H07
4893656	Plate 1 PD_98647-98740	C02	?	0.41906	1.20599	rs33949390	98657			K07
4893656	Plate 1 PD_98647-98740	C02	?	0.47408	1.15357	rs33949390	98657			L07
4893656	Plate 1 PD_98647-98740	D02	G:G	2.14949	1.25979	rs33949390	98658			O07
4893656	Plate 1 PD_98647-98740	D02	G:G	2.42344	1.12941	rs33949390	98658			P07
4893656	Plate 1 PD_98647-98740	E02	G:G	2.87683	1.39914	rs33949390	98659			S07
4893656	Plate 1 PD_98647-98740	E02	G:G	2.66235	1.25636	rs33949390	98659			T07
4893656	Plate 1 PD_98647-98740	F02	G:G	2.36011	1.11961	rs33949390	98660			W07
4893656	Plate 1 PD_98647-98740	F02	G:G	2.47950	1.15599	rs33949390	98660			X07
4893656	Plate 1 PD_98647-98740	G02	G:G	1.42781	1.10113	rs33949390	98661			AA07
4893656	Plate 1 PD_98647-98740	G02	G:G	1.16280	1.06674	rs33949390	98661			AB07
4893656	Plate 1 PD_98647-98740	H02	G:G	2.56866	1.04857	rs33949390	98662			AE07
4893656	Plate 1 PD_98647-98740	H02	G:G	2.69983	1.30769	rs33949390	98662			AF07
4893656	Plate 1 PD_98647-98740	A03	G:G	1.91356	1.70202	rs33949390	98663			C11
4893656	Plate 1 PD_98647-98740	A03	G:G	1.95241	0.94614	rs33949390	98663			D11
4893656	Plate 1 PD_98647-98740	B03	G:G	1.95424	1.19157	rs33949390	98664			G11
4893656	Plate 1 PD_98647-98740	B03	G:G	2.01570	1.30418	rs33949390	98664			H11
4893656	Plate 1 PD_98647-98740	C03	G:G	2.08711	1.24685	rs33949390	98665			K11
4893656	Plate 1 PD_98647-98740	C03	G:G	1.64956	0.96830	rs33949390	98665			L11
4893656	Plate 1 PD_98647-98740	D03	G:G	2.56112	1.16643	rs33949390	98666			O11
4893656	Plate 1 PD_98647-98740	D03	G:G	2.81163	1.17928	rs33949390	98666			P11
4893656	Plate 1 PD_98647-98740	E03	G:G	2.42657	1.08321	rs33949390	98667			S11
4893656	Plate 1 PD_98647-98740	E03	G:G	2.74846	1.15125	rs33949390	98667			T11
4893656	Plate 1 PD_98647-98740	F03	G:G	2.57709	1.27156	rs33949390	98668			W11
4893656	Plate 1 PD_98647-98740	F03	G:G	2.49752	1.26184	rs33949390	98668			X11
4893656	Plate 1 PD_98647-98740	G03	?	0.89077	1.51636	rs33949390	98669			AA11
4893656	Plate 1 PD_98647-98740	G03	?	0.59924	1.13766	rs33949390	98669			AB11
4893656	Plate 1 PD_98647-98740	H03	G:G	2.73958	1.44002	rs33949390	98670			AE11
4893656	Plate 1 PD_98647-98740	H03	G:G	2.65527	1.14758	rs33949390	98670			AF11
4893656	Plate 1 PD_98647-98740	A04	G:G	2.74218	1.19935	rs33949390	98671			C15
4893656	Plate 1 PD_98647-98740	A04	G:G	2.73043	1.39956	rs33949390	98671			D15
4893656	Plate 1 PD_98647-98740	B04	G:G	2.74719	1.16085	rs33949390	98672			G15
4893656	Plate 1 PD_98647-98740	B04	G:G	2.63400	1.24466	rs33949390	98672			H15
4893656	Plate 1 PD_98647-98740	C04	?	0.10556	1.10892	rs33949390	98673			K15
4893656	Plate 1 PD_98647-98740	C04	?	0.09648	1.03093	rs33949390	98673			L15
4893656	Plate 1 PD_98647-98740	D04	G:G	2.82744	1.34366	rs33949390	98674			O15
4893656	Plate 1 PD_98647-98740	D04	G:G	2.78906	1.27766	rs33949390	98674			P15
4893656	Plate 1 PD_98647-98740	E04	?	0.12256	1.42387	rs33949390	98675			S15
4893656	Plate 1 PD_98647-98740	E04	?	0.13124	1.14176	rs33949390	98675			T15
4893656	Plate 1 PD_98647-98740	F04	?	0.12905	1.22811	rs33949390	98676			W15
[truncated: 2,231 more rows]
